# Supplementary material for: Direct oxidative lactonization of alkenoic acids mediated solely by NaIO4: beyond a simple oxidant
Source: Royal Society of Chemistry journal article supplement (doi:10.1039/c6cc02246d), 2016-01-01

# Direct oxidative lactonization of alkenoic acids mediated solely by NaIO<sub>4</sub>: beyond oxidant

Yan-Biao Kang,\* Xian-Min Chen, Chuan-Zhi Yao, and Xiao-Shan Ning

Center of Advanced Nanocatalysis, Department of Chemistry, University of Science and Technology of China, Hefei, Anhui 230026, China

E-mail: ybkang@ustc.edu.cn

## Contents

|                                |           |
|--------------------------------|-----------|
| (1) General information        | S1        |
| (2) General procedures         | S1 – S11  |
| (3) Control reactions          | S11       |
| (4) NMR monitoring experiments | S11 – S12 |
| (5) ICP-AES experiments        | S13       |
| (6) References                 | S14       |
| (7) NMR spectra                | S15 – S46 |

## 1. General information

<sup>1</sup>H and <sup>13</sup>C NMR spectra were recorded on a Bruker 400 spectrometer. Chemical shifts are reported in δ units relative to CHCl<sub>3</sub> [<sup>1</sup>H δ = 7.26, <sup>13</sup>C δ = 77.36]. ICP-AES were recorded on a PerkinElmer Optima 7300 DV. Mass spectra were recorded by the mass spectrometry service at the University of Science and Technology of China. Glycial acid (ACS reagent 99.7%), allylacetic acid, triflic acid, and NaIO<sub>4</sub> were purchased from commercially sources. TfOH solution (1 M in AcOH-Ac<sub>2</sub>O) was prepared by dilution of TfOH into the mixture of AcOH and Ac<sub>2</sub>O (2:1). Acetic anhydride was purified by distillation over P<sub>2</sub>O<sub>5</sub> under an argon atmosphere.

## 2. General procedures

### 2.1. Procedure for the synthesis of acids

### 2,2-diphenylpent-4-enoic acid (**1b**)

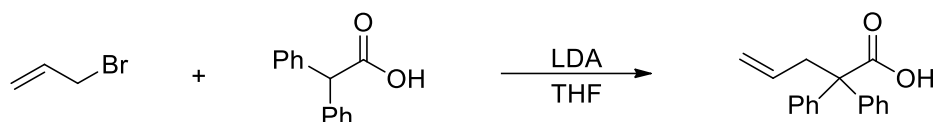

Prepared by literature procedure.<sup>1</sup> A solution containing 10 mmol of 2,2-diphenylacetic acid in 5 mL of dry THF was added to 25 mmol of lithium diisopropylamide (LDA, 2.0 mol/L in THF) in 25 mL of THF at 0 °C. The suspension was stirred for 1 h at 25 °C and 0.5 h at 60 °C. After the mixture was cooled to 0 °C, 25 mmol of 3-bromoprop-1-ene was added and the reaction stirred for 2 h at 60 °C. The mixture was poured into ice-cold water (50 mL) and washed with ether (50 mL × 3). The aqueous phase was acidification with 2 M HCl solution and extracted with ether (50 mL × 3). The organic layer was dried over MgSO<sub>4</sub>, filtered and concentrated under reduced pressure. The crude product was purified by column chromatography on silica gel using petroleum ether and ethyl acetate as eluent to give the titled compound as a white solid (1.80 g, 71%).

### 2,2-dipropylpent-4-enoic acid (**1c**)

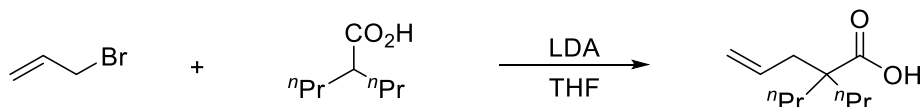

Above procedure for 2,2-diphenylpent-4-enoic acid (**1b**) was used and the titled compound was obtained as colorless oil (1.12 g, 61%).

### 4-methyl-2,2-diphenylpent-4-enoic acid (**1d**)

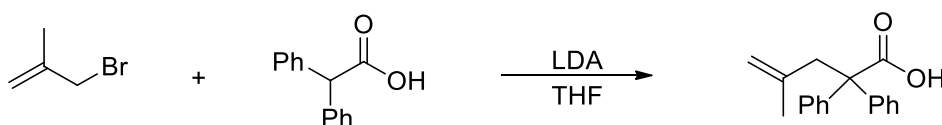

Above procedure for 2,2-diphenylpent-4-enoic acid (**1b**) was used and the titled compound was obtained as a pale yellow solid (0.99 g, 74%).

### 4-phenylpent-4-enoic acid (**1e**)

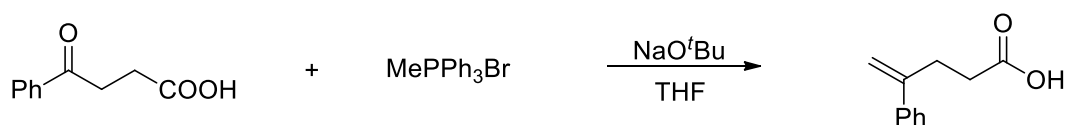

Prepared by literature procedure.<sup>2</sup> To a suspension of methyltriphenylphosphonium bromide (4.64

g, 13 mmol) in THF (20 mL) was added sodium *tert*-butoxide (2.92 g, 26 mmol) at 0 °C. The mixture was then stirred for 30 min. 3-benzoylpropionic acid (1.71 g, 10 mmol) was then added to the reaction mixture at 0 °C. The mixture was allowed to warm to room temperature, and was then stirred for 16 h. After evaporation of THF, dichloromethane and 1 M NaOH solution were added. The aqueous layer was washed with dichloromethane. 2 M HCl solution was then added until the pH of the aqueous layer was to 2, then extracted with dichloromethane twice and dried over NaSO<sub>4</sub>, filtered and concentrated under reduced pressure. The crude product was purified by column chromatography on silica gel using petroleum ether and ethyl acetate as eluent to give the title compound as white solid (1.80 g, 67%).

### 2-methylpent-4-enoic acid (**1f**)

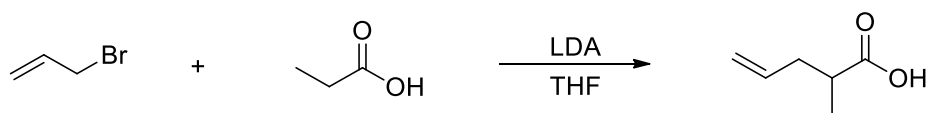

Above procedure for 2,2-diphenylpent-4-enoic acid (**1b**) was used and the titled compound was obtained as colorless oil (1.62 g, 95%).

### 1-allylcyclopentanecarboxylic acid (**1g**)

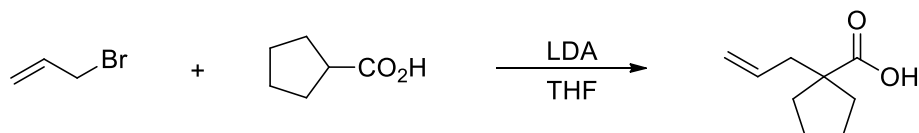

Above procedure for 2,2-diphenylpent-4-enoic acid (**1b**) was used and the titled compound was obtained as colorless oil (1.15 g, 75%).

### 1-allylcyclohexanecarboxylic acid (**1h**)

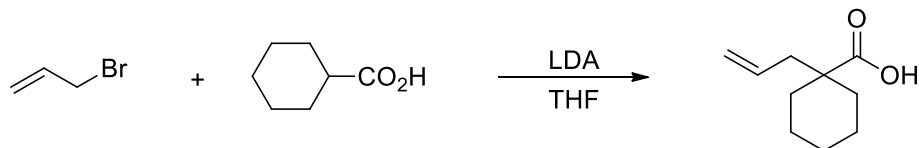

Above procedure for 2,2-diphenylpent-4-enoic acid (**1b**) was used and the titled compound was obtained as colorless oil (1.36 g, 75%).

### 3,3-dimethylpent-4-enoic acid (**1i**)

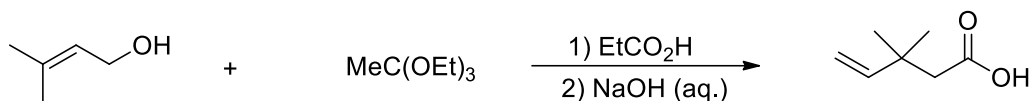

Prepared by literature procedure.<sup>4</sup> 3-Methyl-2-buten-1-ol (1.72 g, 20 mmol) and propionic acid (50 mg, 0.7 mmol) were added in 25 mL of triethyl orthoacetate, the solution was heated at 120-130 °C for 11 h. Then the reaction mixture was cooled to room temperature and poured into a mixture of 50 mL of ice cold 5% H<sub>2</sub>SO<sub>4</sub>. After being stirred overnight, the mixture was extracted with Et<sub>2</sub>O, washed with saturated NaHCO<sub>3</sub>, saturated NaCl and dried over Na<sub>2</sub>SO<sub>4</sub>. The solvent was removed by distillation at reduced pressure to give the crude product. The residue was added over 1 h to a solution of 50% NaOH (aq.) in 50 mL of EtOH-H<sub>2</sub>O (1:1, v/v) at 5 °C. After the addition was complete, the reaction mixture was warmed to room temperature, stirred for 4 h, partitioned between Et<sub>2</sub>O and H<sub>2</sub>O. The organic phase was washed with 5% KOH, and the combined aqueous phases were cooled in ice bath, acidified with concentrated HCl, and extracted with three portions of CH<sub>2</sub>Cl<sub>2</sub>. The combined organic extracts were dried over Na<sub>2</sub>SO<sub>4</sub>, and the solvent was removed by distillation at reduced pressure. The crude product was purified by column chromatography on silica gel using petroleum ether and ethyl acetate as eluent to give the title compound as colorless oil (0.65 g, 51%).

### 2-allylbenzoic acid (1k)

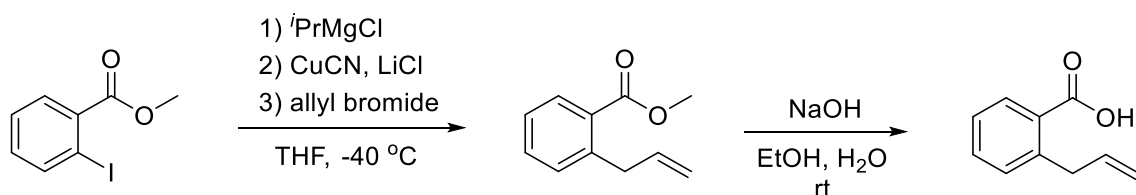

Prepared by literature procedure.<sup>5</sup> *i*PrMgCl (2.0 M in THF) (5.25 mL, 10.5 mmol) was added dropwise to a solution of methyl 2-iodobenzoate (1.83 g, 7.00 mmol) in THF (74 mL) at -40 °C. The resulting mixture was stirred at -40 °C for 1.5 h. Then was added to a freshly prepared solution of CuCN (0.63 g, 7.00 mmol) and LiCl (0.59 g, 14.0 mmol) in THF (20 mL), followed dropwise addition of allyl bromide (2.43 mL, 28.0 mmol). After being stirred at -40 °C, the mixture was allowed to warm to room temperature, diluted with EtOAc (50 mL) and filtered over Celite. The organic solution was washed with a 25% ammonia aqueous solution (100 mL). The aqueous layer was extracted with EtOAc (100 mL × 2). The combined organic layers were washed with brine (100 mL), dried over MgSO<sub>4</sub>,

filtered and concentrated *in vacuo*. The crude product was filtered through a short pad of chromatography column (SiO<sub>2</sub>, PE/EA = 50/1) and then dissolved in EtOH (50 mL). 2 M NaOH solution (50 mL) was added and the resulting mixture was stirred at room temperature for 4 h. EtOH was then removed under reduced pressure and the aqueous layer was extracted with Et<sub>2</sub>O (75 mL × 2). The solution was acidified to pH 3 with 2 M HCl solution and extracted with Et<sub>2</sub>O (75 mL × 3). The combined organic layers were dried over MgSO<sub>4</sub>, filtered and concentrated *in vacuo* to afford 2-allyl benzoic acid (0.76 g, 67% over two steps) as a white solid without further purification.

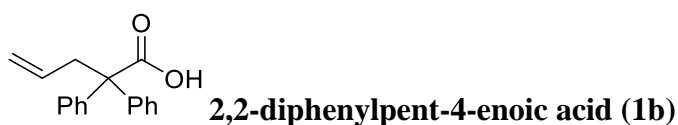

<sup>1</sup>H NMR (CDCl<sub>3</sub>, 400 MHz) δ 7.34-7.25 (m, 10 H), 5.65-5.55 (m, 1 H), 4.97-4.91 (m, 2 H), 3.18 (d, *J* = 6.8 Hz, 2 H).<sup>1</sup>

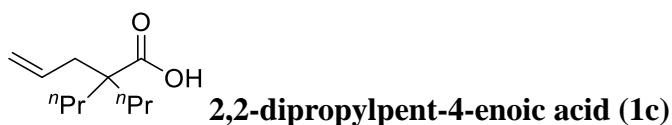

<sup>1</sup>H NMR (CDCl<sub>3</sub>, 400 MHz) δ 5.77-5.66 (m, 1 H), 5.10-5.06 (m, 2 H), 2.35 (d, *J* = 7.6 Hz, 2 H), 1.58-1.47 (m, 4 H), 1.33-1.18 (m, 4 H), 0.90 (t, *J* = 7.2 Hz, 6 H); <sup>13</sup>C NMR (100 MHz, CDCl<sub>3</sub>) δ 184.0, 134.1, 118.3, 49.5, 38.4, 37.5, 17.6, 14.9; HRMS (ESI) calcd for C<sub>11</sub>H<sub>19</sub>O<sub>2</sub> [M-H]<sup>-</sup> 183.1380, found: 183.1386; IR (neat): 3078, 2961, 2936, 2874, 1700, 1641, 1466, 1236, 916 cm<sup>-1</sup>.

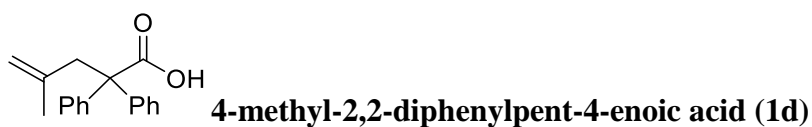

<sup>1</sup>H NMR (CDCl<sub>3</sub>, 400 MHz) δ 7.38-7.25 (m, 10 H), 4.73 (d, *J* = 1.2 Hz, 1 H), 4.58 (d, *J* = 1.2 Hz, 1 H), 3.21 (s, 2 H), 1.36 (s, 3 H); <sup>13</sup>C NMR (100 MHz, CDCl<sub>3</sub>) δ 179.9, 143.0, 142.2, 129.4, 128.2, 127.3, 115.9, 60.5, 46.0, 24.7; HRMS (ESI) calcd for C<sub>18</sub>H<sub>17</sub>O<sub>2</sub> [M-H]<sup>-</sup> 265.1223, found: 265.1223; IR (neat): 3057, 2938, 1698, 1642, 1494, 1445, 1225, 898, 729, 699 cm<sup>-1</sup>.

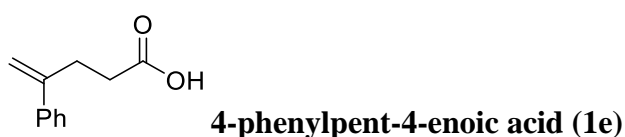

**<sup>1</sup>H NMR** (400 MHz, CDCl<sub>3</sub>) δ 7.42-7.27 (m, 5 H), 5.33 (s, 1 H), 5.12 (d, *J* = 0.8 Hz, 1 H), 2.86 (t, *J* = 7.8 Hz, 2 H), 2.54 (t, *J* = 7.8 Hz, 2 H).<sup>2</sup>

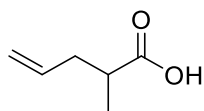

**2-methylpent-4-enoic acid (1f)**

**<sup>1</sup>H NMR** (400 MHz, CDCl<sub>3</sub>) δ 11.31 (br s, 1 H), 5.82-5.72 (m, 1 H), 5.11-5.04 (m, 2 H), 2.60-2.51 (m, 1 H), 2.48-2.41 (m, 1 H), 2.24-2.17 (m, 1 H), 1.19 (d, *J* = 7.2 Hz, 3 H).<sup>3</sup>

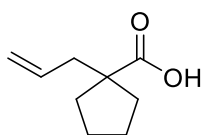

**1-allylcyclopentanecarboxylic acid (1g)**

**<sup>1</sup>H NMR** (CDCl<sub>3</sub>, 400 MHz) δ 11.87 (br s, 1 H), 5.83-5.72 (m, 1 H), 5.10-5.04 (m, 2 H), 2.39 (d, *J* = 7.2 Hz, 2 H), 2.14-2.08 (m, 2 H), 1.73-1.63 (m, 4 H), 1.61-1.55 (m, 2 H); **<sup>13</sup>C NMR** (100 MHz, CDCl<sub>3</sub>) δ 184.8, 135.0, 118.0, 53.7, 43.0, 35.9, 25.5; **HRMS (ESI)** calcd for C<sub>9</sub>H<sub>13</sub>O<sub>2</sub> [M-H]<sup>-</sup> 153.0910, found: 153.0918; **IR** (neat): 3078, 2957, 2874, 1698, 1641, 1453, 1406, 1279, 1234, 1196, 917 cm<sup>-1</sup>.

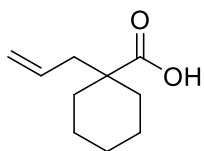

**1-allylcyclohexanecarboxylic acid (1h)**

**<sup>1</sup>H NMR** (CDCl<sub>3</sub>, 400 MHz) δ 11.78 (br s, 1 H), 5.81-5.71 (m, 1 H), 5.08-5.03 (m, 2 H), 2.29 (d, *J* = 7.6 Hz, 2 H), 2.04 (d, *J* = 13.2 Hz, 2 H), 1.63-1.58 (m, 3 H), 1.46-1.36 (m, 2 H), 1.30-1.21 (m, 3 H); **<sup>13</sup>C NMR** (100 MHz, CDCl<sub>3</sub>) δ 183.2, 133.7, 118.3, 47.5, 44.7, 33.8, 26.1, 23.4; **HRMS (ESI)** calcd for C<sub>10</sub>H<sub>15</sub>O<sub>2</sub> [M-H]<sup>-</sup> 167.1067, found: 167.1074; **IR** (neat): 3078, 2934, 2858, 1698, 1641, 1454, 1416, 1283, 1245, 1139, 917 cm<sup>-1</sup>.

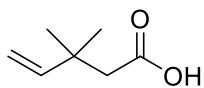

**3,3-dimethylpent-4-enoic acid (1i)**

**<sup>1</sup>H NMR** (CDCl<sub>3</sub>, 400 MHz) δ 5.92 (dd, *J* = 17.4, 10.6 Hz, 1 H), 5.03-4.96 (m, 2 H), 2.35 (s, 2 H), 1.17 (s, 6 H).<sup>4</sup>

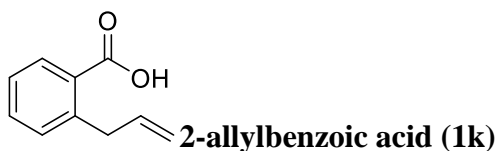

$^1\text{H NMR}$  ( $\text{CDCl}_3$ , 400 MHz)  $\delta$  8.06 (d,  $J = 8.0$  Hz, 1 H), 7.53-7.49 (m, 1 H), 7.34-7.31 (m, 2 H), 6.11-6.00 (m, 1 H), 5.07-5.03 (m, 2 H), 3.84 (d,  $J = 6.4$  Hz, 2 H).<sup>5</sup>

## 2.2. General reaction conditions.

$\text{NaIO}_4$  (1.25 mmol, 267 mg) was added to 2 mL solvent of  $\text{AcOH-Ac}_2\text{O}$  (2:1, v/v), followed by the addition of allylacetic acid (1 mmol, 100 mg) and  $\text{TfOH}$  (0.05 mmol). The resulting reaction mixture was stirred at corresponding temperature for desired time. After cooled down to room temperature,  $\text{H}_2\text{O}$  (20 mL) was added and resulting mixture was extracted with ethyl ether (20 mL  $\times$  3). The organic layer was dried over  $\text{MgSO}_4$ , filtered and concentrated under reduced pressure. The crude mixture was purified by silica gel chromatography.

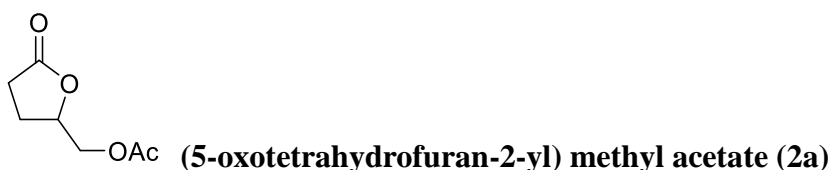

Colorless oil, 112.3 mg, 71% yield ( $\text{NaIO}_4$ : 1.25 mmol, 0.267 g, 70  $^\circ\text{C}$ , 14 h).  $^1\text{H NMR}$  (400 MHz,  $\text{CDCl}_3$ )  $\delta$  4.75-4.70 (m, 1 H), 4.30 (dd,  $J = 12.4, 3.2$  Hz, 1 H), 4.13 (dd,  $J = 12.4, 5.6$  Hz, 1 H), 2.64-2.50 (m, 2 H), 2.39-2.30 (m, 1 H), 2.11-1.98 (m, 1 H), 2.09 (s, 3 H).<sup>6</sup>

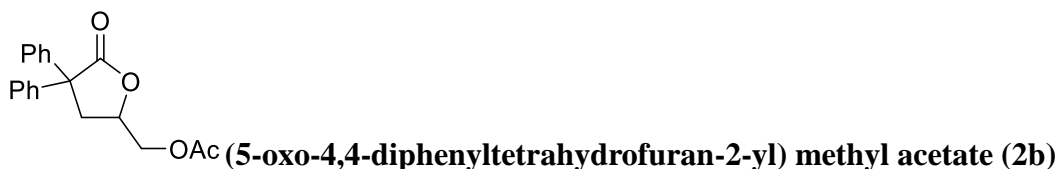

Colorless oil, 257.6 mg, 83% yield ( $\text{NaIO}_4$ : 1.25 mmol, 0.267 g, 80  $^\circ\text{C}$ , 24 h).  $^1\text{H NMR}$  (400 MHz,  $\text{CDCl}_3$ )  $\delta$  7.40-7.25 (m, 10 H), 4.62-4.55 (m, 1 H), 4.41 (dd,  $J = 12.4, 3.2$  Hz, 1 H), 4.19 (dd,  $J = 12.4, 6.0$  Hz, 1 H), 3.02 (dd,  $J = 12.8, 5.2$  Hz, 1 H), 2.78 (dd,  $J = 13.0, 10.6$  Hz, 1 H), 2.09 (s, 3 H).<sup>7</sup>

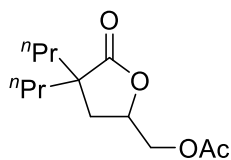

**(5-oxo-4,4-dipropyltetrahydrofuran-2-yl) methyl acetate (2c)**

Colorless oil, 171.2 mg, 71% yield (NaIO<sub>4</sub>: 1.25 mmol, 0.267 g, TfOH: 5 mol %, 60 °C, 68 h). **<sup>1</sup>H NMR** (400 MHz, CDCl<sub>3</sub>) δ 4.62-4.55 (m, 1 H), 4.27 (dd, *J* = 12.2, 3.0 Hz, 1 H), 4.04 (dd, *J* = 12.2, 6.2 Hz, 1 H), 2.08 (dd, *J* = 11.6, 6.4 Hz, 1 H), 2.06 (s, 3 H), 1.92 (dd, *J* = 12.6, 9.0 Hz, 1 H), 1.61-1.44 (m, 4 H), 1.39-1.14 (m, 4 H), 0.92-0.87 (m, 6 H); **<sup>13</sup>C NMR** (100 MHz, CDCl<sub>3</sub>) δ 180.6, 170.9, 74.4, 65.7, 47.9, 39.8, 38.8, 34.2, 21.0, 17.9, 14.6 (two peaks); **HRMS (ESI)** calcd for C<sub>13</sub>H<sub>23</sub>O<sub>4</sub> [M+H]<sup>+</sup> 243.1591, found: 243.1587; **IR** (neat): 2961, 2936, 2875, 1770, 1747, 1459, 1371, 1236, 1192, 1130, 1045, 975, 934 cm<sup>-1</sup>.

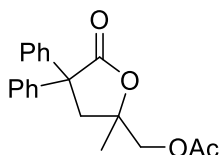

**(2-methyl-5-oxo-4,4-diphenyltetrahydrofuran-2-yl) methyl acetate (2d)**

White solid, 204.4 mg, 63% yield (NaIO<sub>4</sub>: 1.25 mmol, 0.267 g, TfOH: 10 mol %, 80 °C, 96 h). **<sup>1</sup>H NMR** (400 MHz, CDCl<sub>3</sub>) δ 7.40-7.25 (m, 10 H), 4.11 (d, *J* = 11.6 Hz, 1 H), 4.05 (d, *J* = 12.0 Hz, 1 H), 3.17 (d, *J* = 14.0 Hz, 1 H), 2.96 (d, *J* = 14.0 Hz, 2 H), 1.99 (s, 3 H), 1.35 (s, 3 H); **<sup>13</sup>C NMR** (100 MHz, CDCl<sub>3</sub>) δ 177.0, 170.8, 142.9, 142.6, 129.2, 129.0, 127.8 (three peaks), 127.7, 81.3, 68.7, 58.8, 45.4, 24.3, 20.9; **HRMS (ESI)** calcd for C<sub>20</sub>H<sub>21</sub>O<sub>4</sub> [M+H]<sup>+</sup> 325.1434, found: 325.1435; **IR** (neat): 3055, 2974, 2929, 1754, 1732, 1496, 1449, 1385, 1297, 1248, 1234, 1176, 1140, 1091, 1061, 982, 766, 709, 648 cm<sup>-1</sup>.

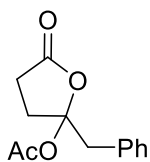

**(5-oxo-2-phenyltetrahydrofuran-2-yl) methyl acetate (2e)**

Colorless oil, 175.4 mg, 75% yield (NaIO<sub>4</sub>: 1.25 mmol, 0.267 g, 70 °C, 39 h). **<sup>1</sup>H NMR** (400 MHz, CDCl<sub>3</sub>) δ 7.35-7.26 (m, 5 H), 3.35 (d, *J* = 14.0 Hz, 1 H), 3.25 (d, *J* = 14.4 Hz, 1 H), 2.82-2.73 (m, 1 H), 2.54-2.46 (m, 1H), 2.43-2.35 (m, 1 H), 2.25-2.16 (m, 1 H), 2.07 (s, 3 H).<sup>6</sup>



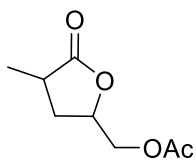

**(4-methyl-5-oxotetrahydrofuran-2-yl) methyl acetate (2f)**

Colorless oil, 131.9 mg, 77% yield (NaIO<sub>4</sub>: 1.25 mmol, 0.267 g, 70 °C, 24 h). For the mixture of *cis* and *trans* isomers: **<sup>1</sup>H NMR** (400 MHz, CDCl<sub>3</sub>) δ 4.68-4.63 (m, 0.54 H), 4.56-4.49 (m, 1 H), 4.25 (dd, *J* = 12.4, 3.2 Hz, 1 H), 4.19 (dd, *J* = 12.2, 3.4 Hz, 0.56 H), 4.07 (dd, *J* = 12.0, 5.2 Hz, 0.54 H), 4.04 (dd, *J* = 12.4, 6.2 Hz, 1 H), 2.72-2.61 (m, 1.58 H), 2.47-2.40 (m, 1 H), 2.26-2.20 (m, 0.62 H), 2.04-1.97 (m, 0.55 H), 2.02 (s, 3 H), 2.02 (s, 1.57 H), 1.63-1.54 (m, 1 H), 1.23 (s, 3 H), 1.21 (s, 1.71 H).

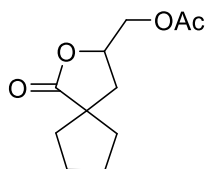

**(1-oxo-2-oxaspiro [4.4] nonan-3-yl) methyl acetate (2g)**

Colorless oil, 161.8 mg, 76% yield (NaIO<sub>4</sub>: 1.25 mmol, 0.267 g, TfOH: 5 mol %, 70 °C, 24 h). **<sup>1</sup>H NMR** (400 MHz, CDCl<sub>3</sub>) δ 4.62-4.56 (m, 1 H), 4.28 (dd, *J* = 12.4, 3.2 Hz, 1 H), 4.09 (dd, *J* = 12.4, 6.4 Hz, 1 H), 2.20-2.11 (m, 2 H), 2.07 (s, 3 H), 1.93-1.79 (m, 4 H), 1.76-1.58 (m, 4 H); **<sup>13</sup>C NMR** (100 MHz, CDCl<sub>3</sub>) δ 182.0, 170.9, 74.8, 65.4, 49.9, 39.0, 38.0, 37.2, 25.7, 25.6, 21.0; **HRMS (ESI)** calcd for C<sub>11</sub>H<sub>17</sub>O<sub>4</sub> [M+H]<sup>+</sup> 213.1121, found: 213.1121; **IR** (neat): 2956, 2872, 1770, 1746, 1448, 1371, 1234, 1188, 1155, 1043, 975, 933 cm<sup>-1</sup>.

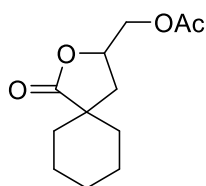

**(1-oxo-2-oxaspiro [4.5] decan-3-yl) methyl acetate (2h)**

Colorless oil, 172.0 mg, 76% yield (NaIO<sub>4</sub>: 1.25 mmol, 0.267 g, TfOH: 5 mol %, 70 °C, 24 h). **<sup>1</sup>H NMR** (400 MHz, CDCl<sub>3</sub>) δ 4.66-4.60 (m, 1 H), 4.31 (dd, *J* = 12.4, 3.2 Hz, 1 H), 4.09 (dd, *J* = 12.4, 6.4 Hz, 1 H), 2.33 (dd, *J* = 12.8, 6.8 Hz, 1 H), 2.09 (s, 3 H), 1.86-1.72 (m, 4 H), 1.67-1.49 (m, 4 H), 1.42-1.21 (m, 3 H); **<sup>13</sup>C NMR** (100 MHz, CDCl<sub>3</sub>) δ 181.1, 171.0, 74.5, 65.7, 44.7, 35.5, 34.4, 32.3, 25.5, 22.4 (two peaks), 21.1; **HRMS (ESI)** calcd for C<sub>12</sub>H<sub>19</sub>O<sub>4</sub> [M+H]<sup>+</sup> 227.1278, found: 227.1276; **IR** (neat): 2935, 2859, 1766, 1743, 1450, 1372, 1236, 1194, 1167, 1032, 963, 942 cm<sup>-1</sup>.

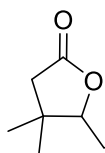

**(3,3-dimethyl-5-oxotetrahydrofuran-2-yl) methyl acetate (2i)**

Colorless oil, 80.1 mg, 43% yield (NaIO<sub>4</sub>: 1.25 mmol, 0.267 g, 70 °C, 24 h). <sup>1</sup>H NMR (400 MHz, CDCl<sub>3</sub>) δ 4.30-4.24 (m, 2 H), 4.11 (dd, *J* = 11.2, 6.0 Hz, 1 H), 2.37 (s, 2 H), 2.06 (s, 3 H), 1.22 (s, 3 H), 1.08 (s, 3 H).<sup>8</sup>

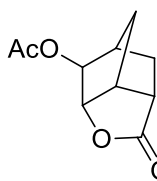

**5-exo-Acetoxy-6-endo-hydroxybicyclo[2.2.1]heptane-2-endo-carboxylic acid lactone**

**(2j)**

White solid, 131.5 mg, 67% yield (NaIO<sub>4</sub>: 1.25 mmol, 0.267 g, TfOH: 5 mol %, 60 °C, 36 h). <sup>1</sup>H NMR (400 MHz, CDCl<sub>3</sub>) δ 4.99 (s, 1 H), 4.86 (d, *J* = 7.2 Hz, 1 H), 2.76 (s, 1 H), 2.68 (d, *J* = 5.2 Hz, 1 H), 2.61 (d, *J* = 6.4 Hz, 1 H), 2.05 (dd, *J* = 15.4, 7.0 Hz, 1 H), 2.04 (s, 3 H), 1.76 (dd, *J* = 13.6, 6.4 Hz, 1 H), 1.69 (dd, *J* = 15.4, 5.8 Hz, 1 H), 1.47 (dd, *J* = 13.6, 5.2 Hz, 1 H); <sup>13</sup>C NMR (100 MHz, CDCl<sub>3</sub>) δ 178.4, 170.4, 84.3, 76.1, 46.2, 43.7, 42.7, 29.8, 25.4, 21.4; **HRMS (ESI)** calcd for C<sub>10</sub>H<sub>13</sub>O<sub>4</sub> [M+H]<sup>+</sup> 197.0808, found: 197.0808; **IR** (neat): 2988, 1784, 1728, 1378, 1249, 1197, 1113, 1024, 1005, 961, 930, 834 cm<sup>-1</sup>.

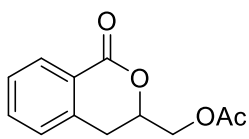

**(1-oxoisochroman-3-yl) methyl acetate (2k)**

Colorless oil, 200.9 mg, 91% yield (NaIO<sub>4</sub>: 1.25 mmol, 0.267 g, TfOH: 5 mol %, 70 °C, 48 h). <sup>1</sup>H NMR (400 MHz, CDCl<sub>3</sub>) δ 8.08 (d, *J* = 8.0 Hz, 1 H), 7.55 (t, *J* = 7.6 Hz, 1 H), 7.40 (t, *J* = 7.6 Hz, 1 H), 7.26 (d, *J* = 7.6 Hz, 1 H), 4.79-4.75 (m, 1 H), 4.36 (d, *J* = 4.4 Hz, 2 H), 3.12 (dd, *J* = 16.4, 11.6 Hz, 1 H), 2.94 (dd, *J* = 16.4, 3.2 Hz, 1 H), 2.09 (s, 3 H); <sup>13</sup>C NMR (100 MHz, CDCl<sub>3</sub>) δ 171.0, 164.9, 138.4, 134.3, 130.7, 128.2, 127.8, 125.1, 76.1, 65.3, 30.0, 21.0; **HRMS (ESI)** calcd for C<sub>12</sub>H<sub>12</sub>O<sub>4</sub>Na [M+Na]<sup>+</sup> 243.0633, found: 243.0635; **IR** (neat): 2954, 1728, 1608, 1460, 1368, 1227, 1085, 1031 963, 942, 747, 695, 605 cm<sup>-1</sup>.

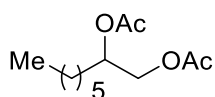

**octane-1,2-diyl diacetate (2l)**

Colorless oil, 126.8 mg, 55% yield (NaIO<sub>4</sub>: 0.5 mmol, 0.107 g, 80 °C, 36 h). <sup>1</sup>H NMR (400 MHz, CDCl<sub>3</sub>) δ 5.07-5.02 (m, 1 H), 4.20 (dd, *J* = 12.0, 3.2 Hz, 1 H), 4.00 (dd, *J* = 12.0, 6.8 Hz, 1 H), 2.04 (s, 3 H, two peaks), 1.58-1.50 (m, 2 H), 1.27-1.25 (m, 8 H), 0.85 (t, *J* = 6.6 Hz, 3 H).<sup>9</sup>

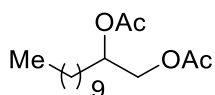

**dodecane-1,2-diyl diacetate (2m)**

Colorless oil, 54% yield (NaIO<sub>4</sub>: 0.50 mmol, 0.107 g, 80 °C, 46 h). <sup>1</sup>H NMR (400 MHz, CDCl<sub>3</sub>) δ 5.07-5.01 (m, 1 H), 4.20 (dd, *J* = 11.6, 3.2 Hz, 1 H), 4.00 (dd, *J* = 11.8, 6.6 Hz, 1 H), 2.04 (s, 3 H), 2.03 (s, 3 H), 1.57-1.52 (m, 2 H), 1.27-1.23 (m, 16 H), 0.86 (t, *J* = 6.4 Hz, 3 H).<sup>9</sup>

### 3. Control reactions

**Equation 1, Scheme 4.** NaIO<sub>4</sub> (0-1.25 mmol, 0-267.4 mg) was added to 2 mL premixed solvent of AcOH-Ac<sub>2</sub>O (2:1, v/v), followed by the addition of 5-(iodomethyl)-dihydrofuran-2(3*H*)-one (1 mmol, 226 mg) and TfOH (0.05 mmol). The resulting reaction mixture was stirred at 70 °C for 14 h. The conversions were collected on GC using ethyl 3-phenylpropionate as internal standard.

**Equation 2, Scheme 4.** NaIO<sub>4</sub> (0.25-1.25 equiv, 53.5-267.4 mg) was added to 2 mL premixed solvent of AcOH-Ac<sub>2</sub>O (2:1, v/v), followed by the addition of allylacetic acid (1 mmol, 100 mg) and TfOH (0.05 mmol). The resulting reaction mixture was stirred at 70 °C for 14 h. The conversions were collected on GC using ethyl 3-phenylpropionate as internal standard.

**Equation 3, Scheme 4.** NaIO<sub>3</sub> (1.25 equiv, 247 mg) was added to 2 mL premixed solvent of AcOH-Ac<sub>2</sub>O (2:1, v/v), followed by the addition of allylacetic acid (1 mmol, 100 mg) and TfOH (0.05 mmol). The resulting reaction mixture was stirred at 70 °C for 14 h. The conversions were collected on GC using ethyl 3-phenylpropionate as internal standard.

### 4. NMR monitoring experiments

All data were collected by <sup>1</sup>H NMR using ethyl 3-phenylpropionate as internal standard.

**General procedure:** Ethyl 3-phenyl-propionate (0.5 mmol, 89 mg) and NaIO<sub>4</sub> (6.25 mmol, 1.34 g) were added to 10 mL solvent of AcOH-Ac<sub>2</sub>O (2:1, v/v), followed by the addition of allylacetic acid (5 mmol, 501 mg) and TfOH (0.25 mmol, 38 mg). The resulting reaction mixture was stirred at 70 °C and sampled 30 μL of reaction mixture for <sup>1</sup>H NMR tests. Allylacetic acid [**1a**], (3-oxocyclopentyl)methyl acetate [**2a**] and 3-(iodomethyl)cyclopentan-1-one [**3a**] were determined using ethyl 3-phenylpropionate as internal standard by <sup>1</sup>H NMR. The results were demonstrated in Table S1 and Figure S1.

**Table S1. [1a], [2a] and [3a] v.s. Time.**

| Time (min) | <b>1a</b> (%) | <b>2a</b> (%) | <b>3a</b> (%) |
|------------|---------------|---------------|---------------|
| 0          | 100           | 0             | 0             |
| 30         | 94            | 4             | 3             |
| 60         | 89            | 6             | 5             |
| 120        | 84            | 10            | 7             |
| 180        | 76            | 16            | 10            |
| 240        | 67            | 22            | 12            |
| 360        | 45            | 34            | 18            |
| 480        | 17            | 45            | 27            |
| 600        | 0             | 60            | 30            |
| 720        |               | 66            | 20            |
| 840        |               | 71            | 9             |
| 960        |               | 73            | 6             |

Conditions: NaIO<sub>4</sub> (6.25 mmol, 1.34 g), allylacetic acid (5 mmol, 501 mg), TfOH (0.25 mmol, 38 mg), solvent (10 mL), 70 °C, ethyl 3-phenylpropionate (0.5 mmol, 89 mg) as internal standard.

## 5. ICP-AES experiments

The trace metals in the reaction mixture were measured by ICP-AES at Instruments Center for Physical Science of the University of Science and Technology of China.

中国科学技术大学理化科学实验中心

### 检测报告

样品名称:

报告日期: 2014.9.19

送样单位:

报告编号:

| 样品名称 | 测定元素含量( $\mu\text{g}/\text{mL}$ ) |              |              |              |
|------|-----------------------------------|--------------|--------------|--------------|
|      | Fe                                | Cu           | Ru           | Ir           |
|      | Not detected                      | Not detected | Not detected | Not detected |
|      | Pb                                | Pt           | Pd           | Ag           |
|      | Not detected                      | Not detected | Not detected | Not detected |
|      | Au                                |              |              |              |
|      | Not detected                      |              |              |              |
|      |                                   |              |              |              |
|      |                                   | 俞平明          |              | 2014.9.19    |
|      |                                   |              |              |              |

## 6. References

- 1 N. T. Barczak, E. R. Jarvo, *Chem. Eur. J.* **2011**, *17*, 12912.
- 2 A. Takemiya, J. F. Hartwig, *J. Am. Chem. Soc.* **2006**, *128*, 6042.
- 3 C. Taillier, B. Gille, V. Bellosta, J. Cossy, *J. Org. Chem.* **2005**, *70*, 2097.
- 4 W. A. Kleschick, *J. Org. Chem.* **1986**, *51*, 5429; V. Jaeger, H. J. Guenther, *Tetrahedron Lett.* **1977**, *29*, 2543.
- 5 S. Nicolai, C. Piemontesi, J. Waser, *Angew. Chem. Int. Ed.* **2011**, *50*, 4680.
- 6 Y.-B. Kang, L. H. Gade, *J. Am. Chem. Soc.* **2011**, *133*, 3658.
- 7 T. Marcello, T. Lorenzo, T. Marco, B. Donatella, *Tetrahedron* **1990**, *46*, 7139.
- 8 H.-J. Ha, K.-N. Yoon, S.-Y. Lee, Y.-S. Park, M.-S. Lim, Y.-G. Yim, *J. Org. Chem.* **1998**, *63*, 8062.
- 9 Y.-B. Kang, L. H. Gade, *J. Org. Chem.* **2012**, *77*, 1610.

# 7 NMR spectra

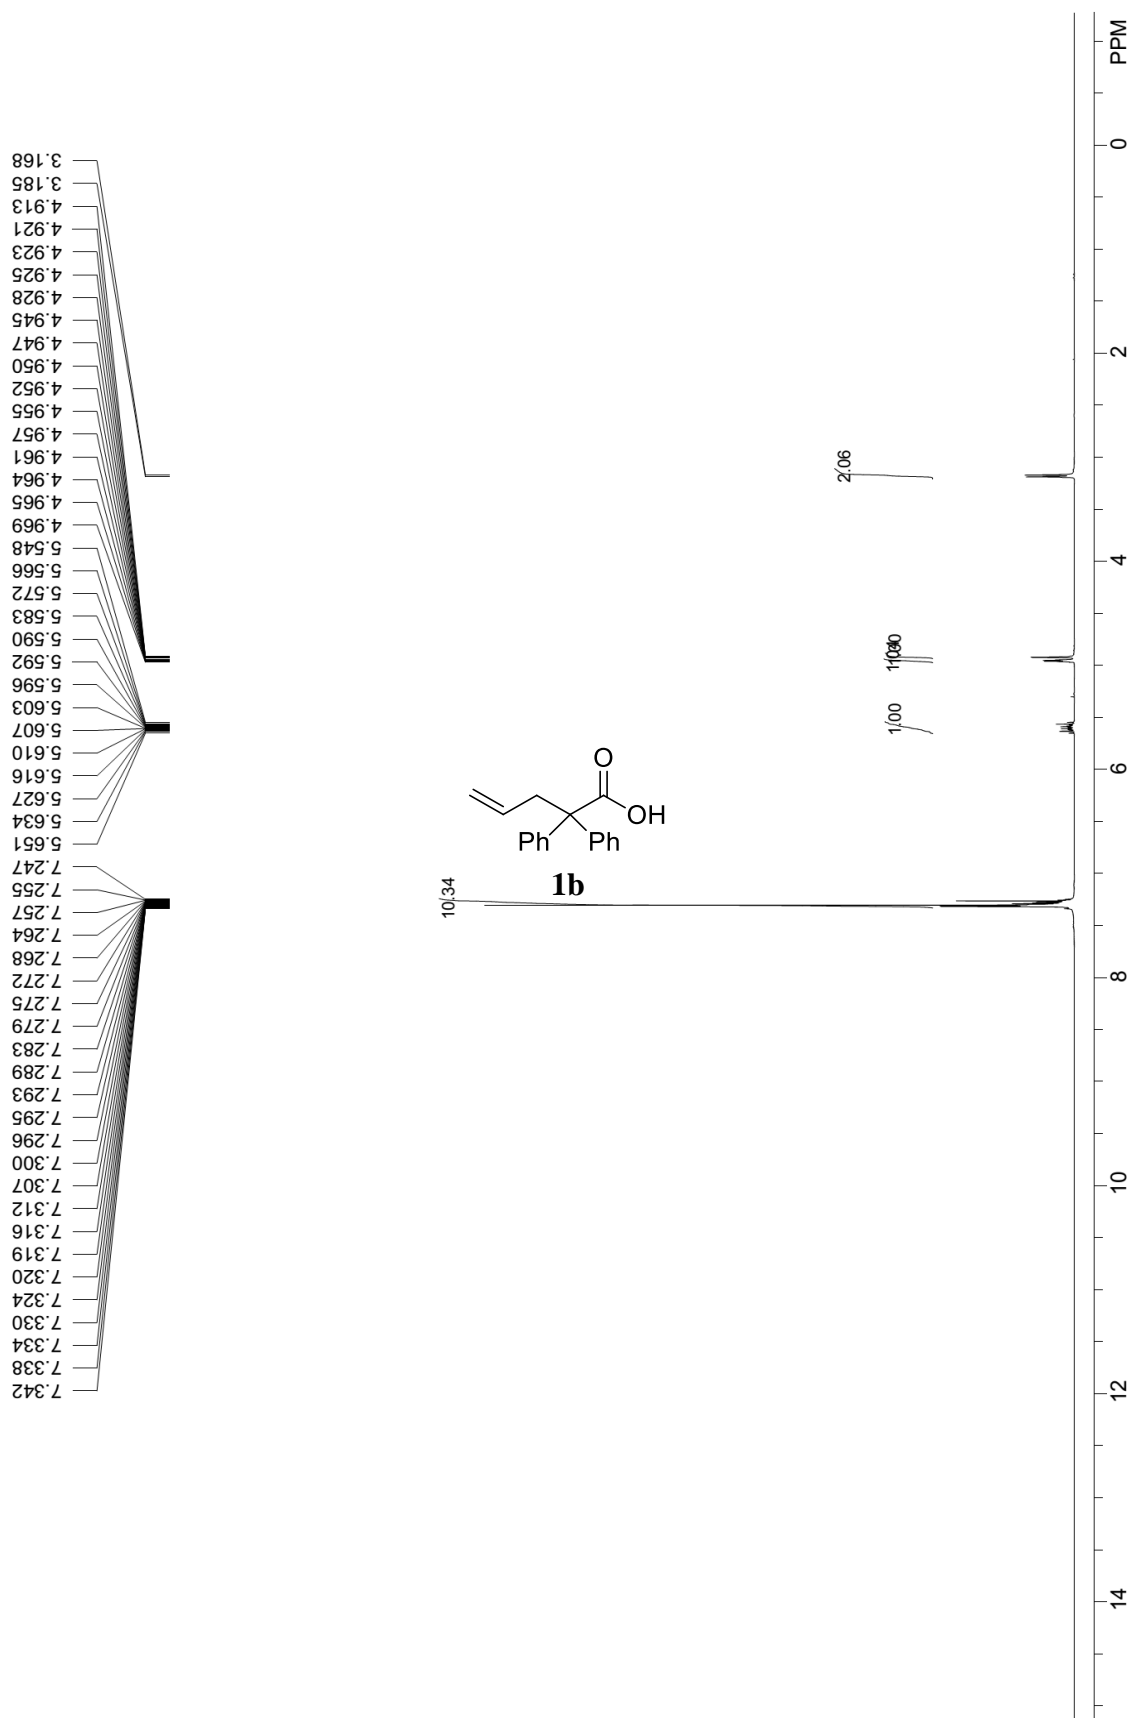

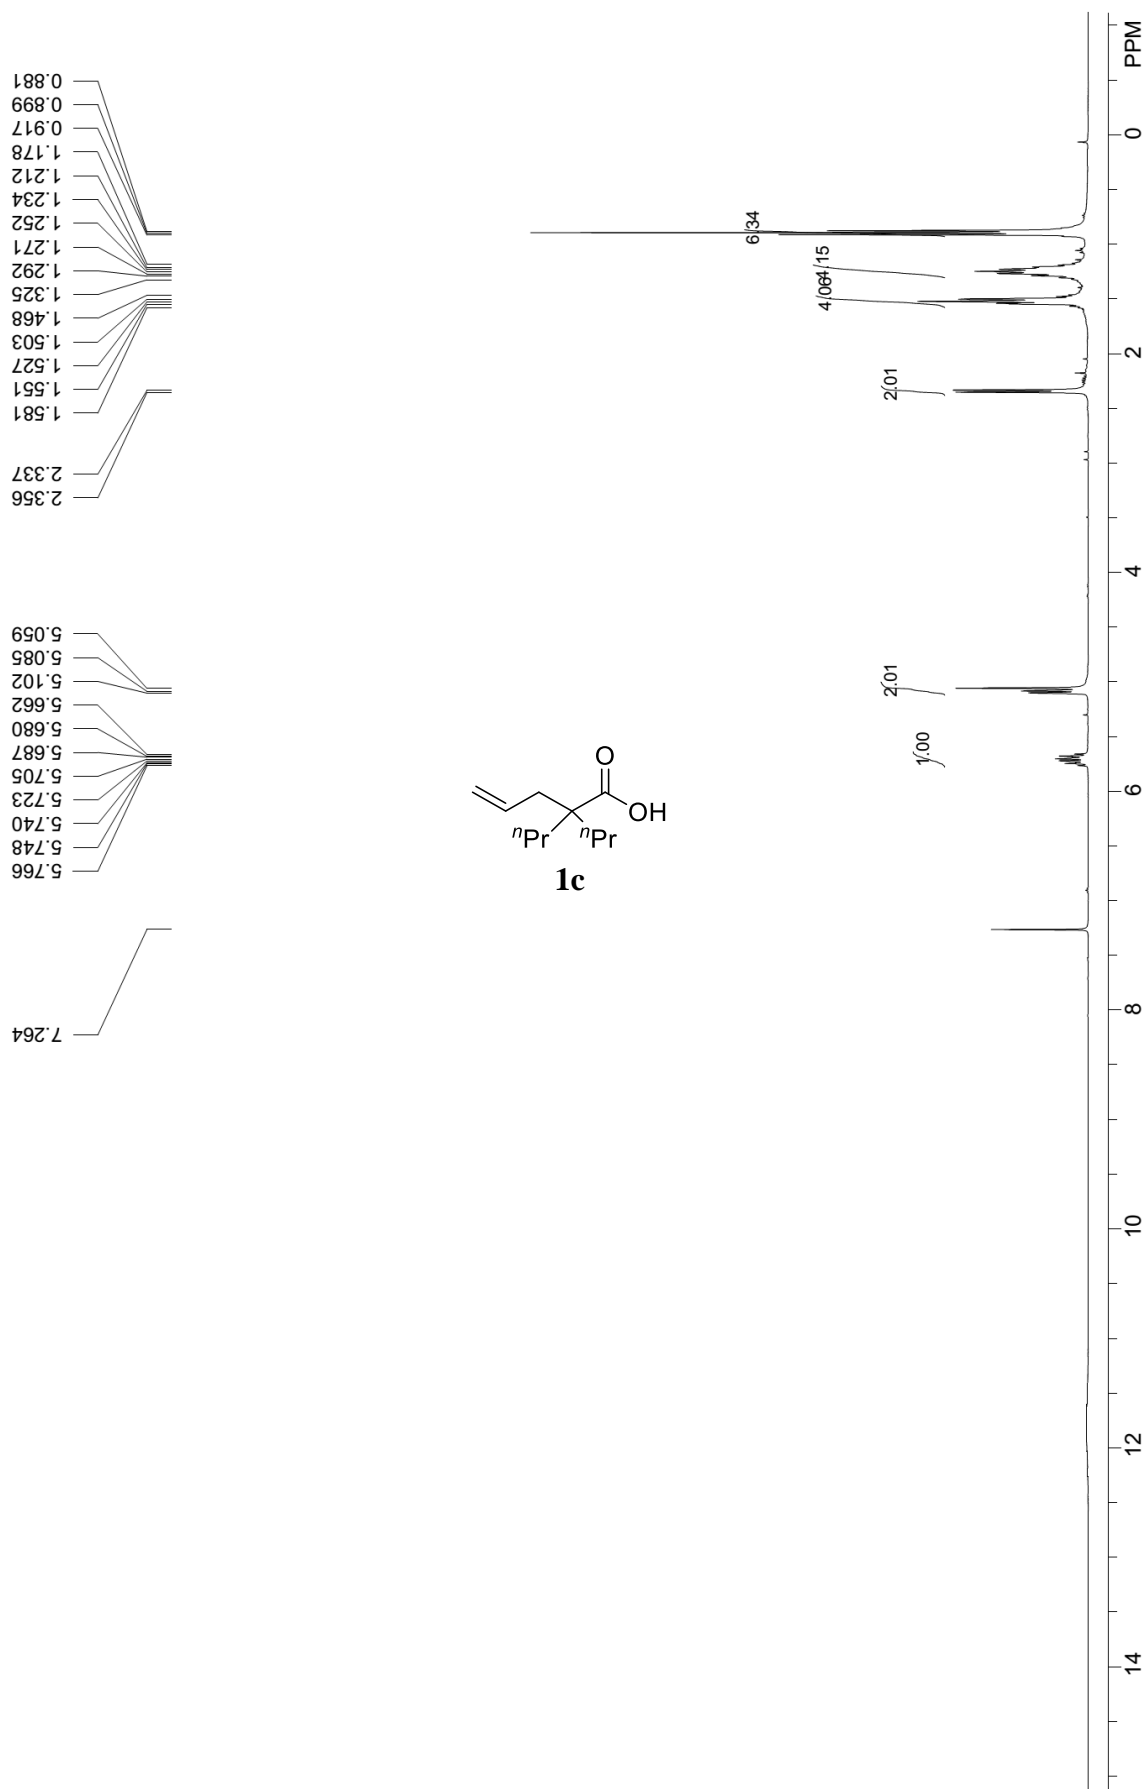



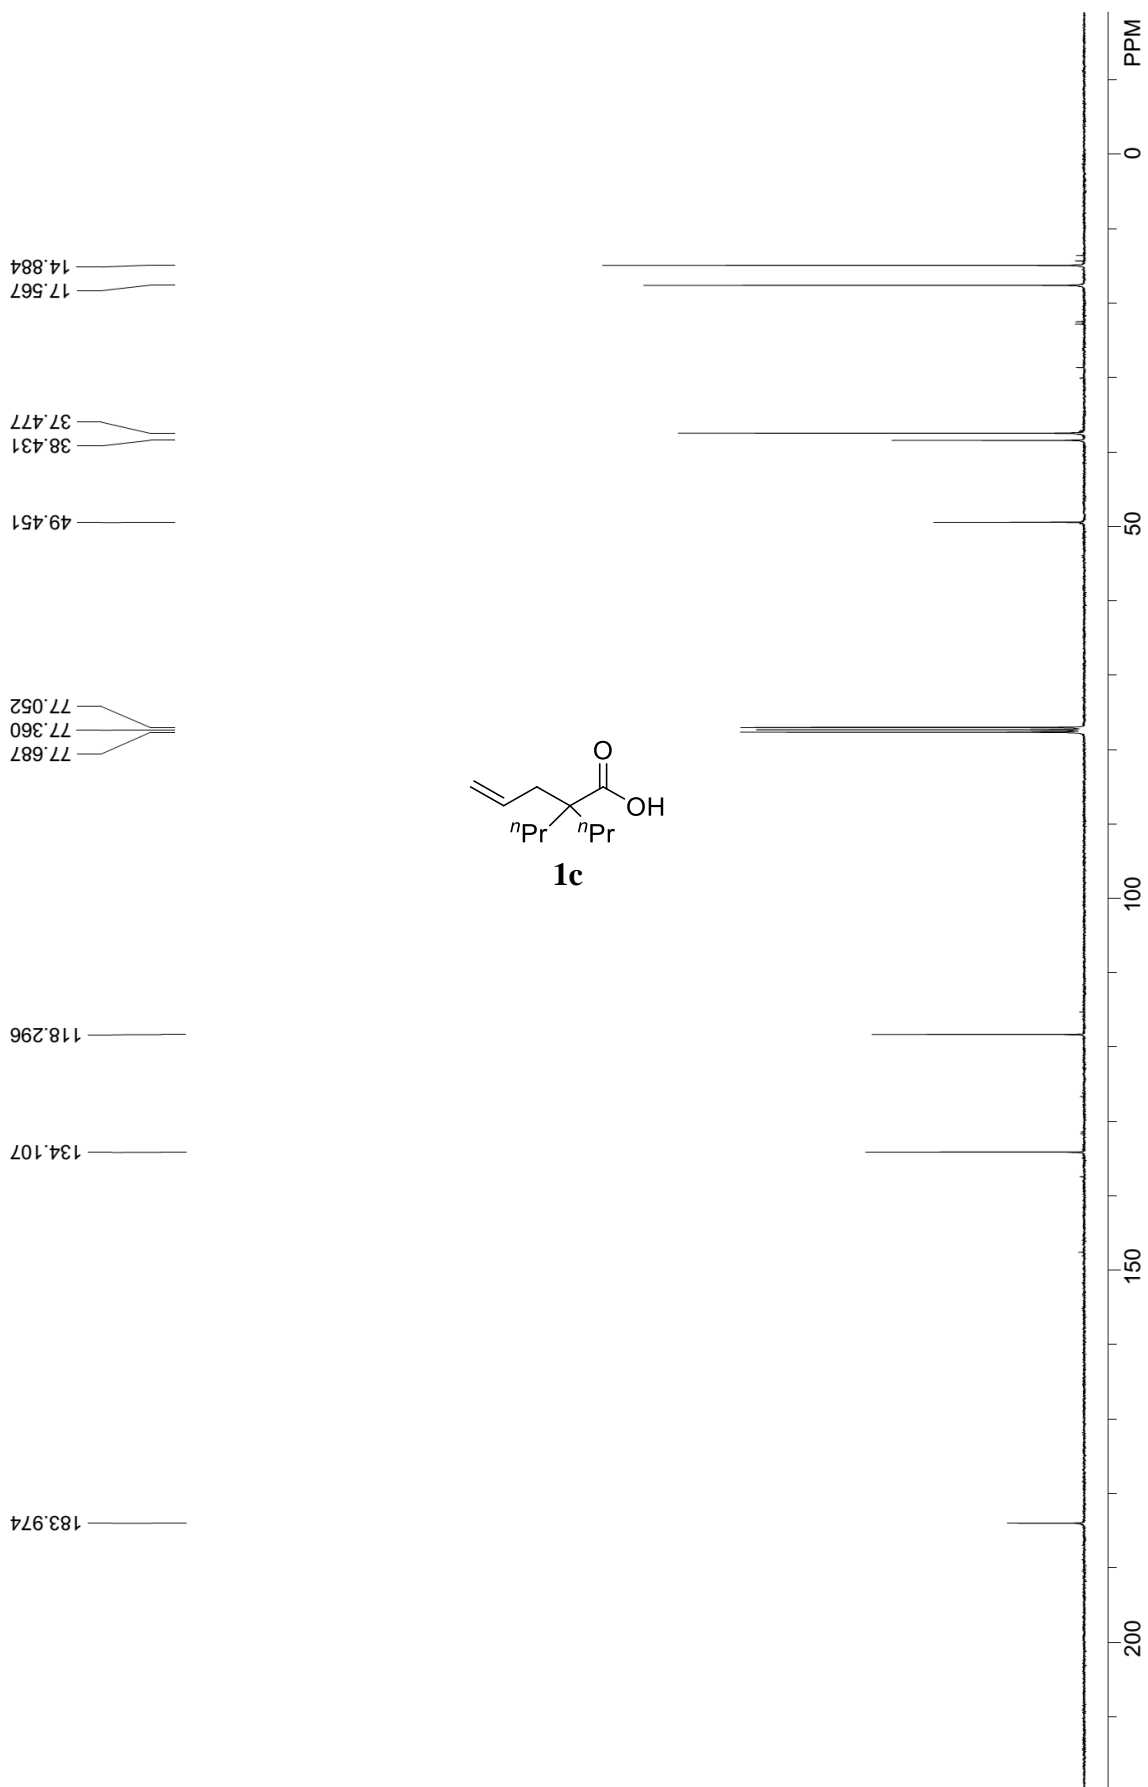

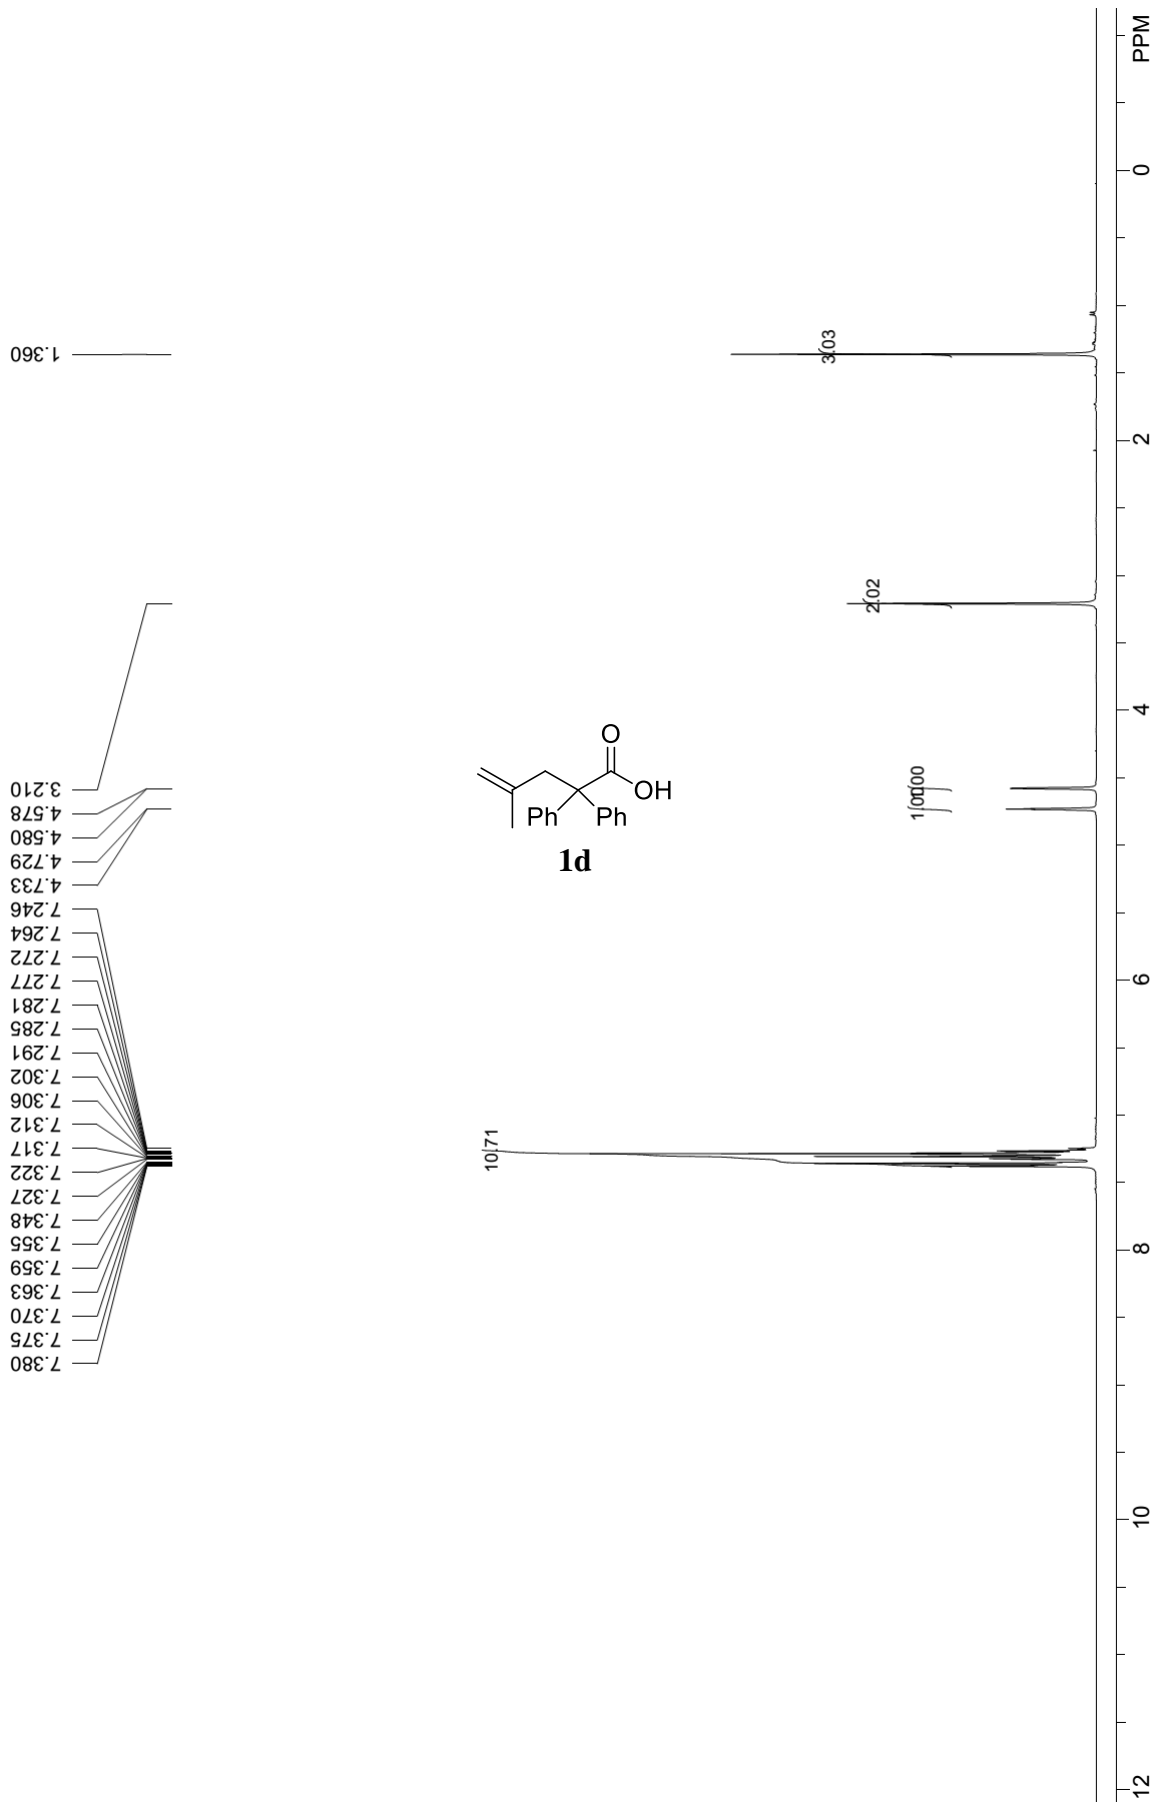

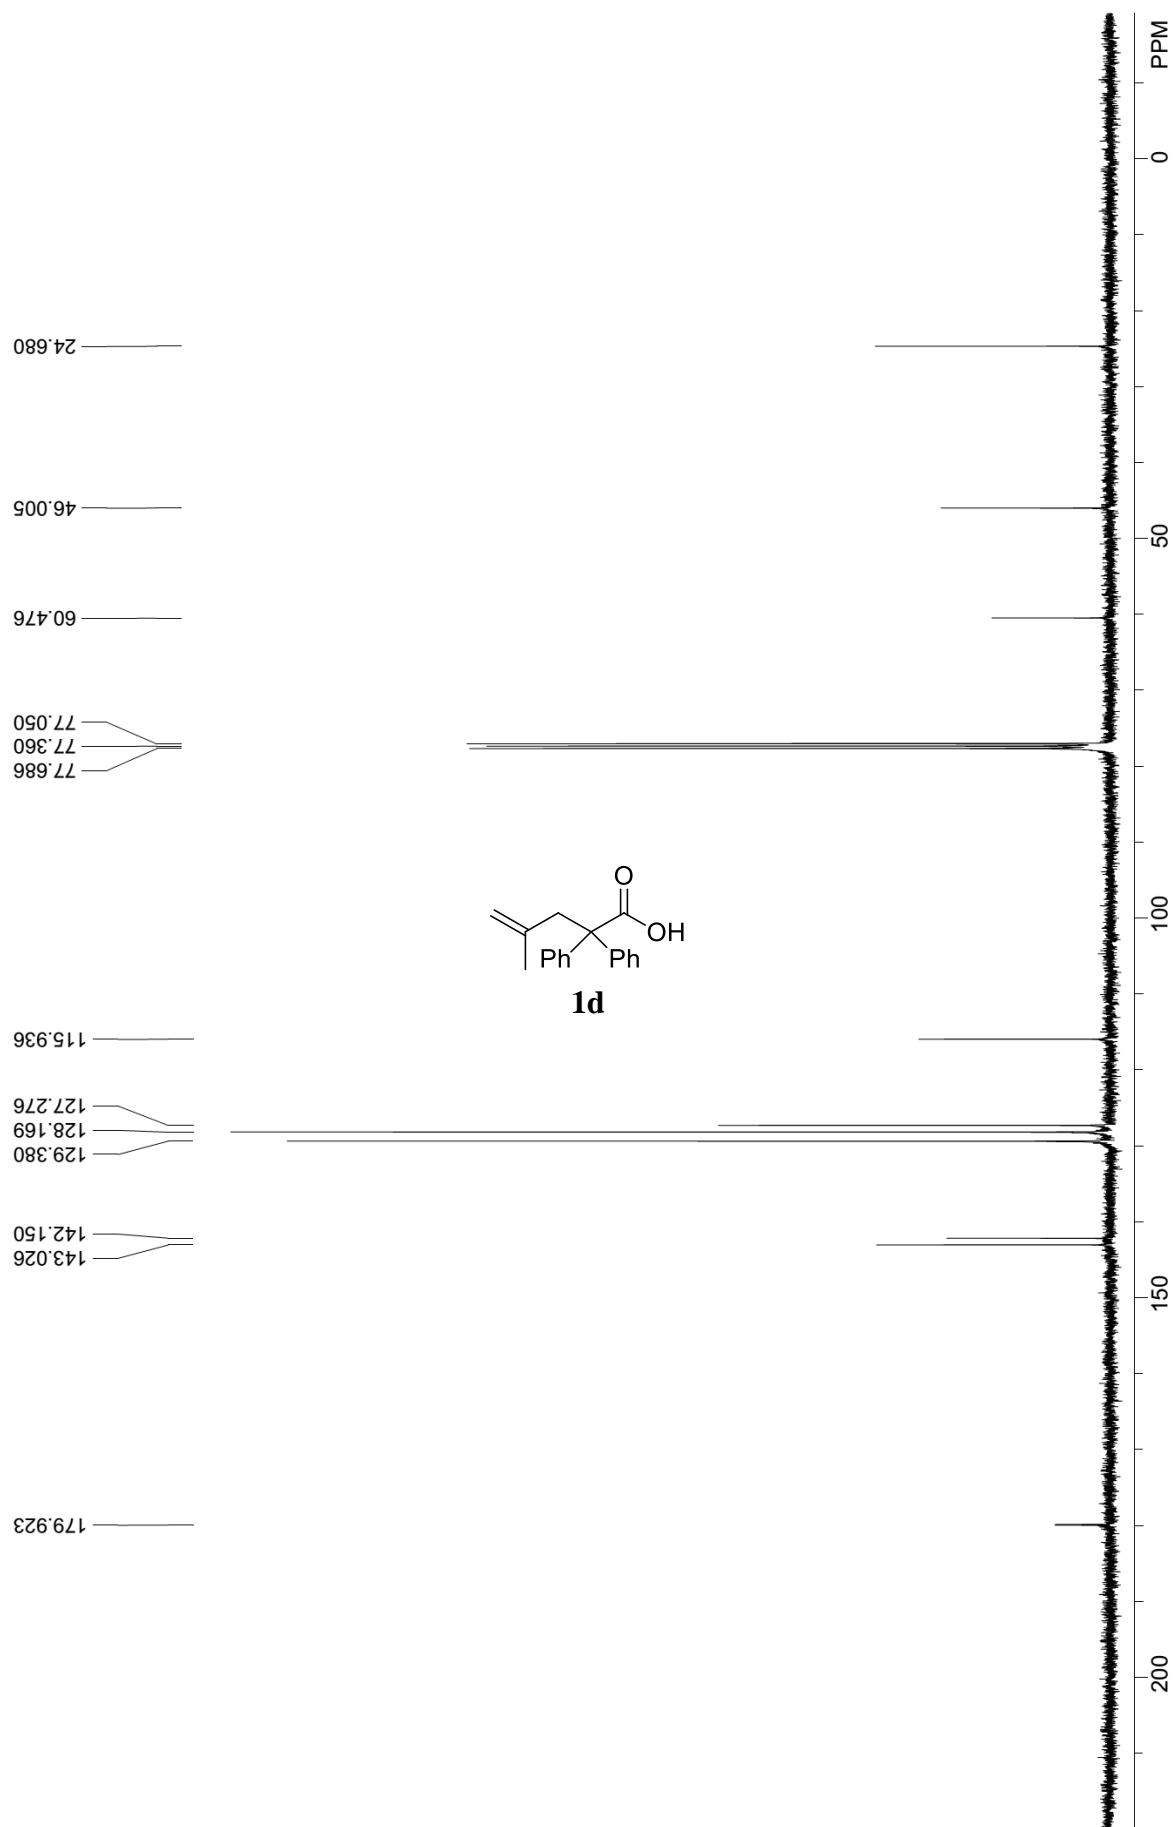

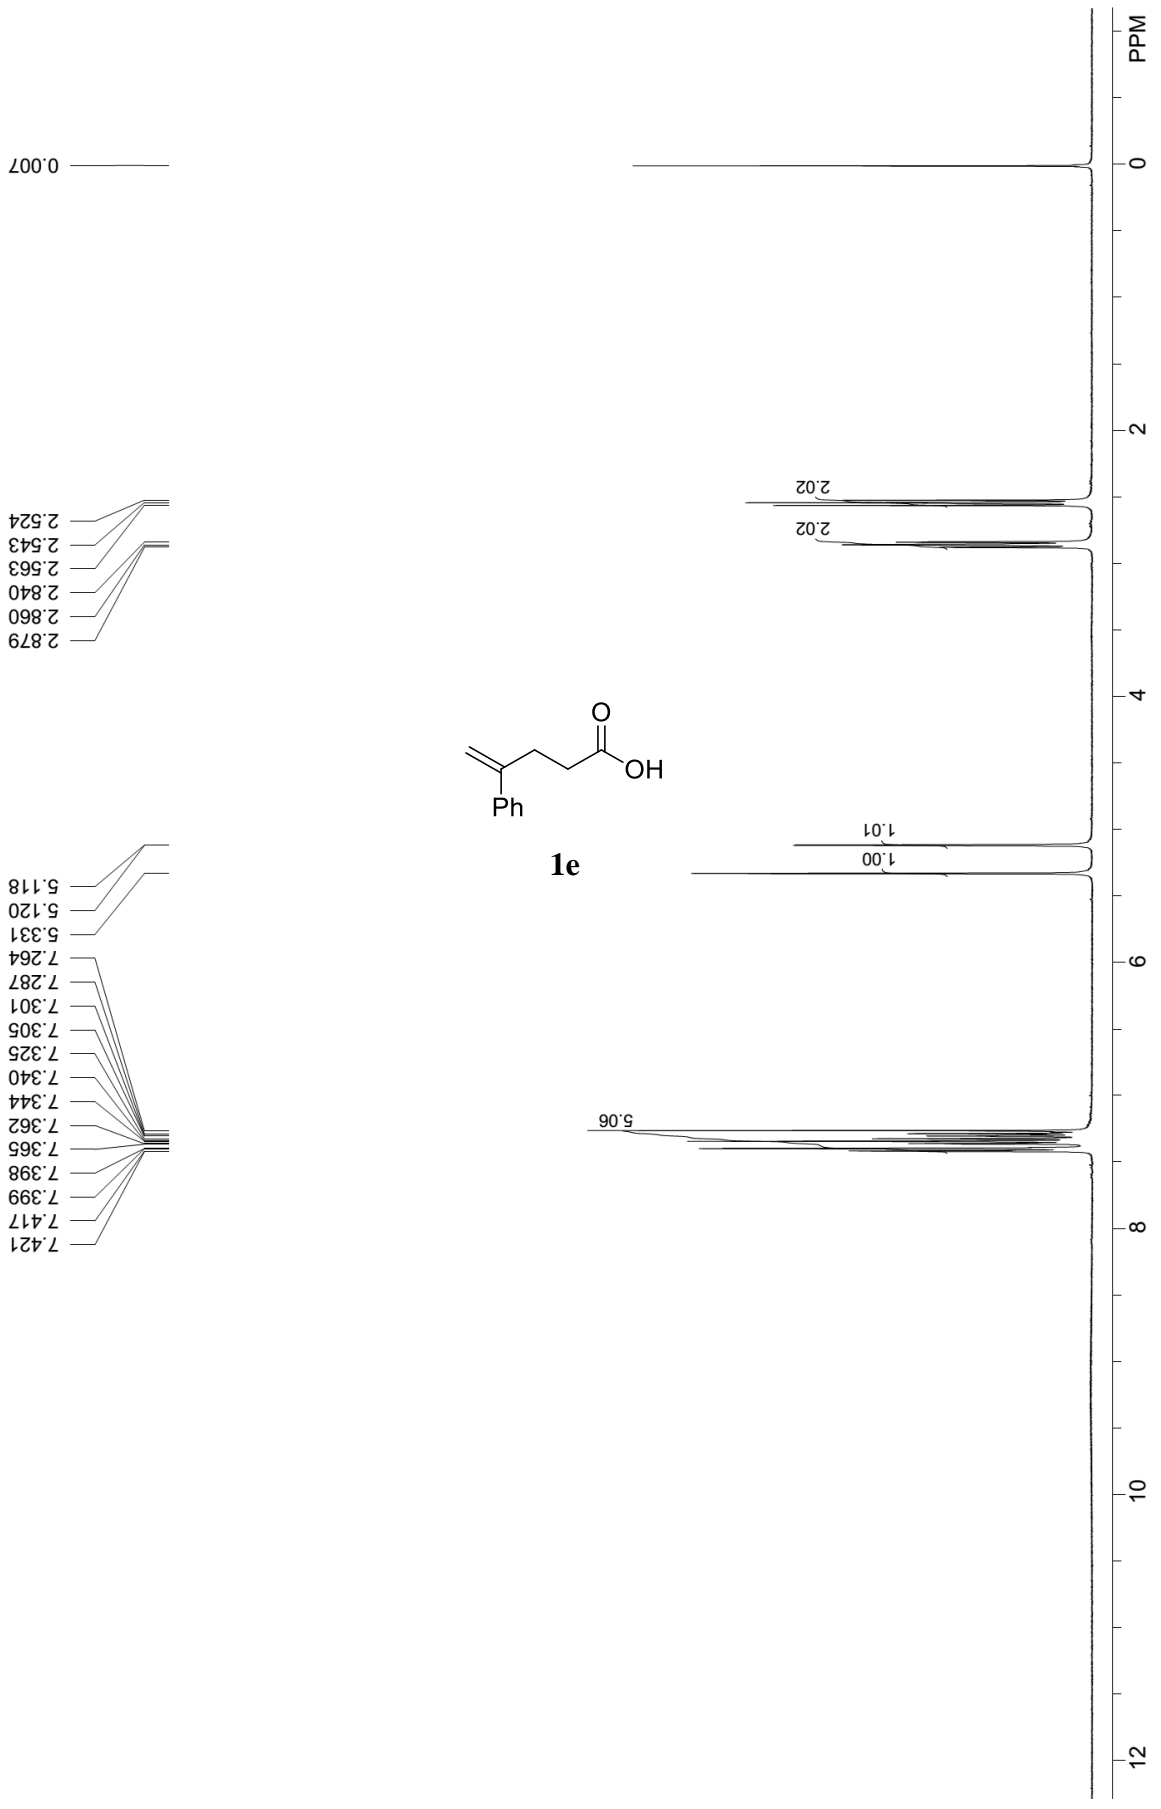

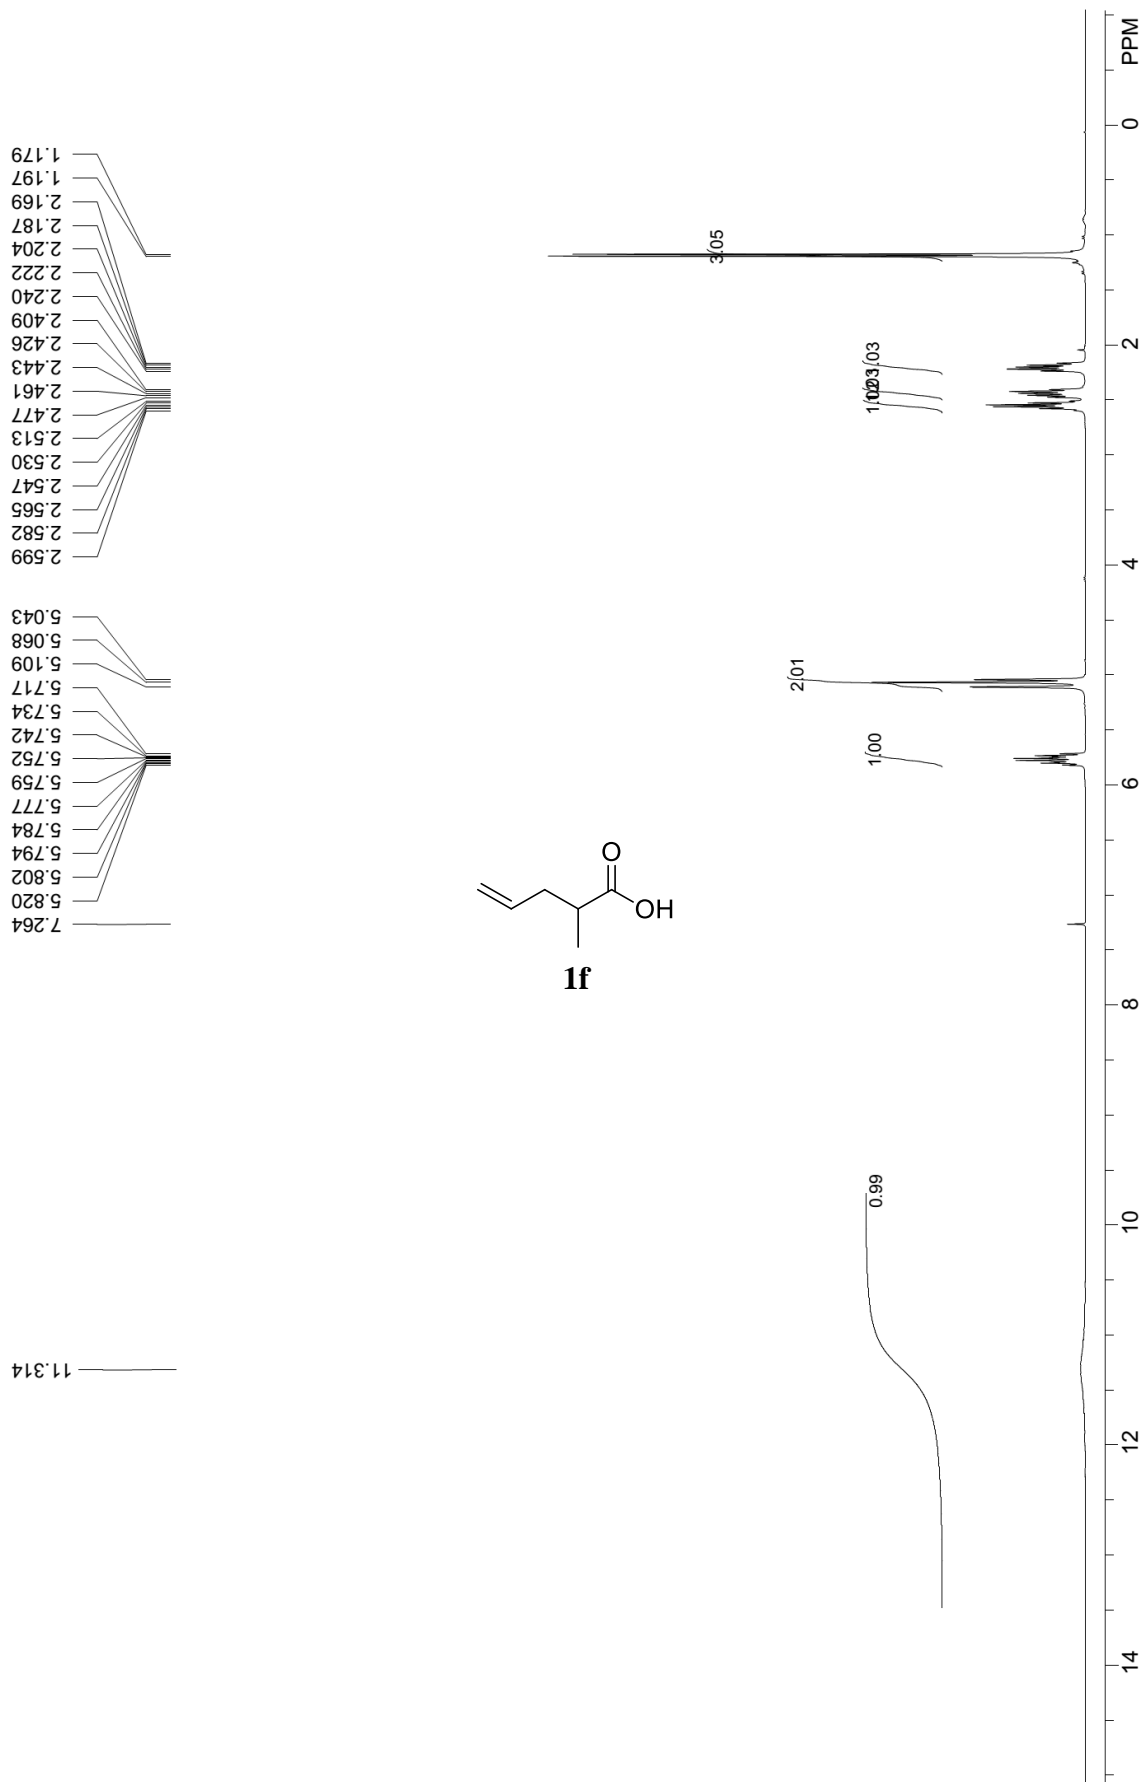

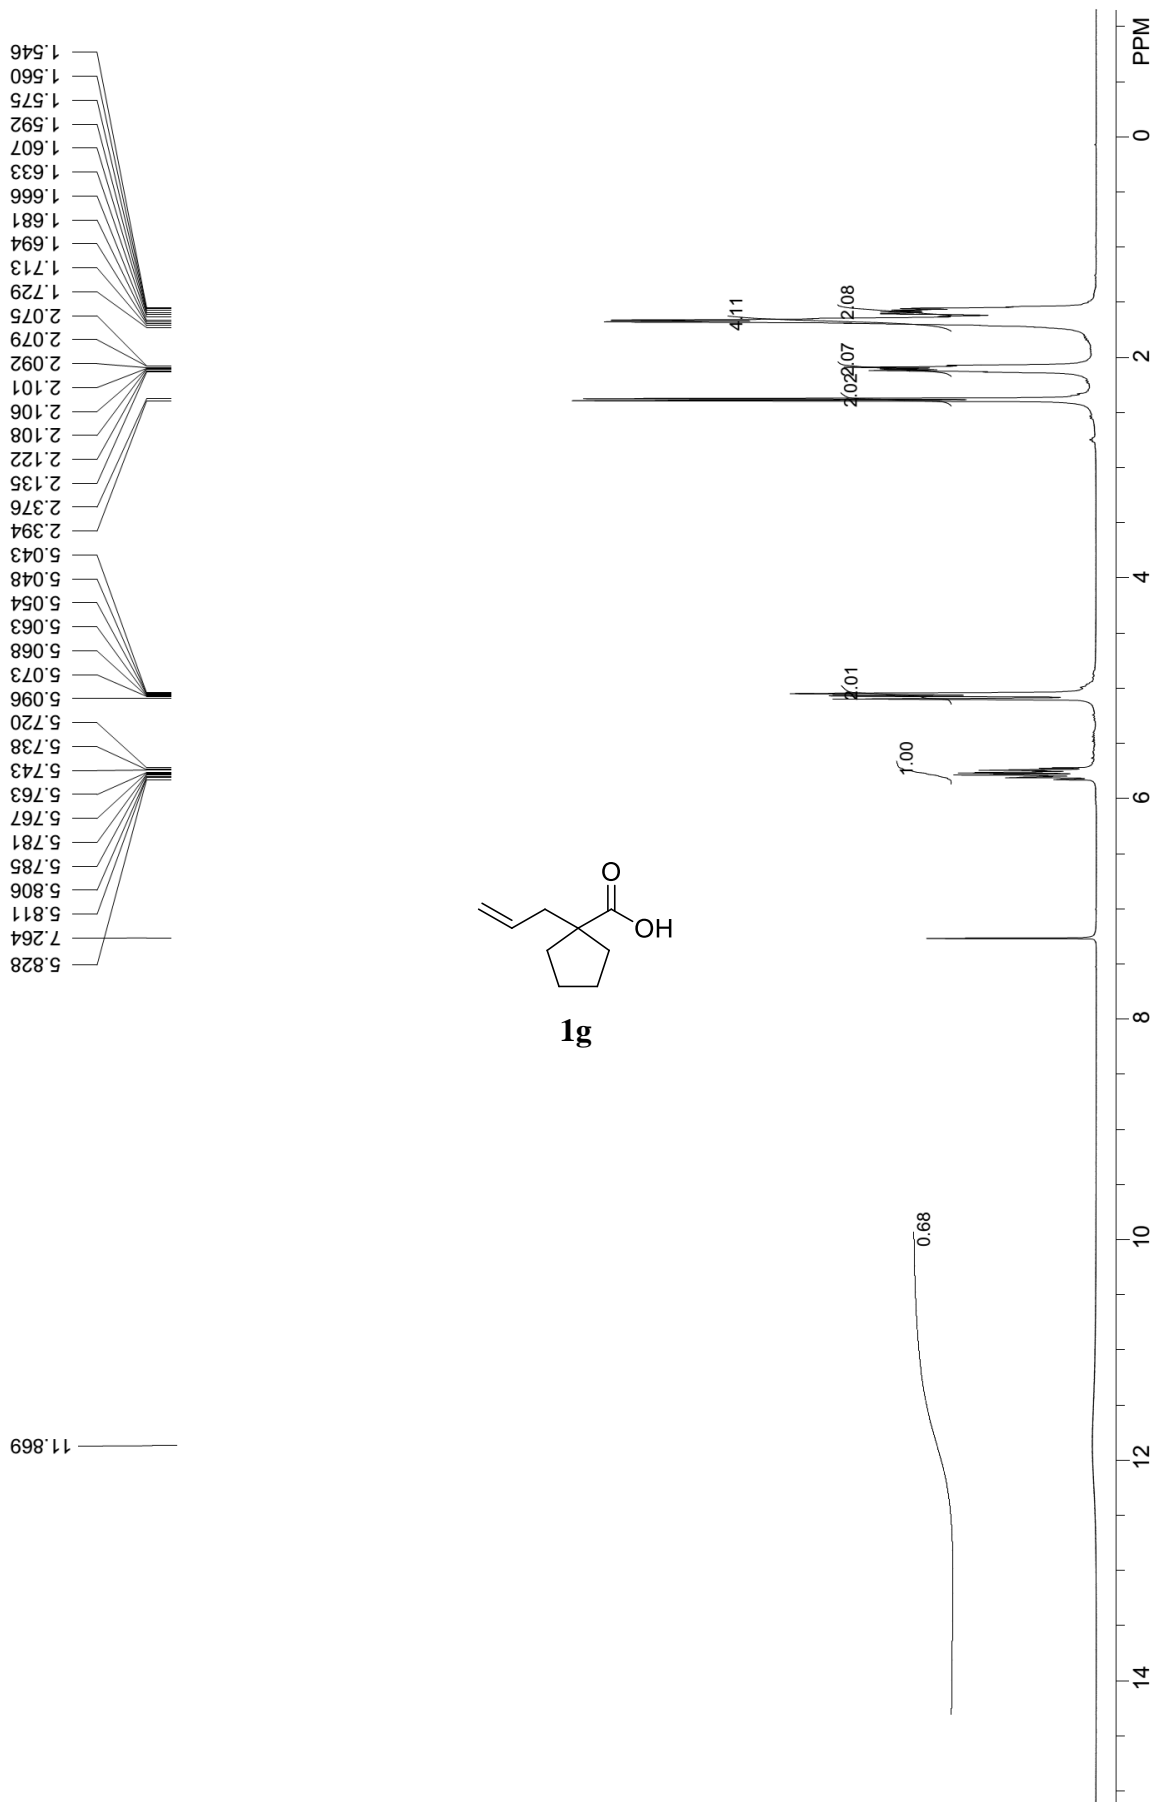

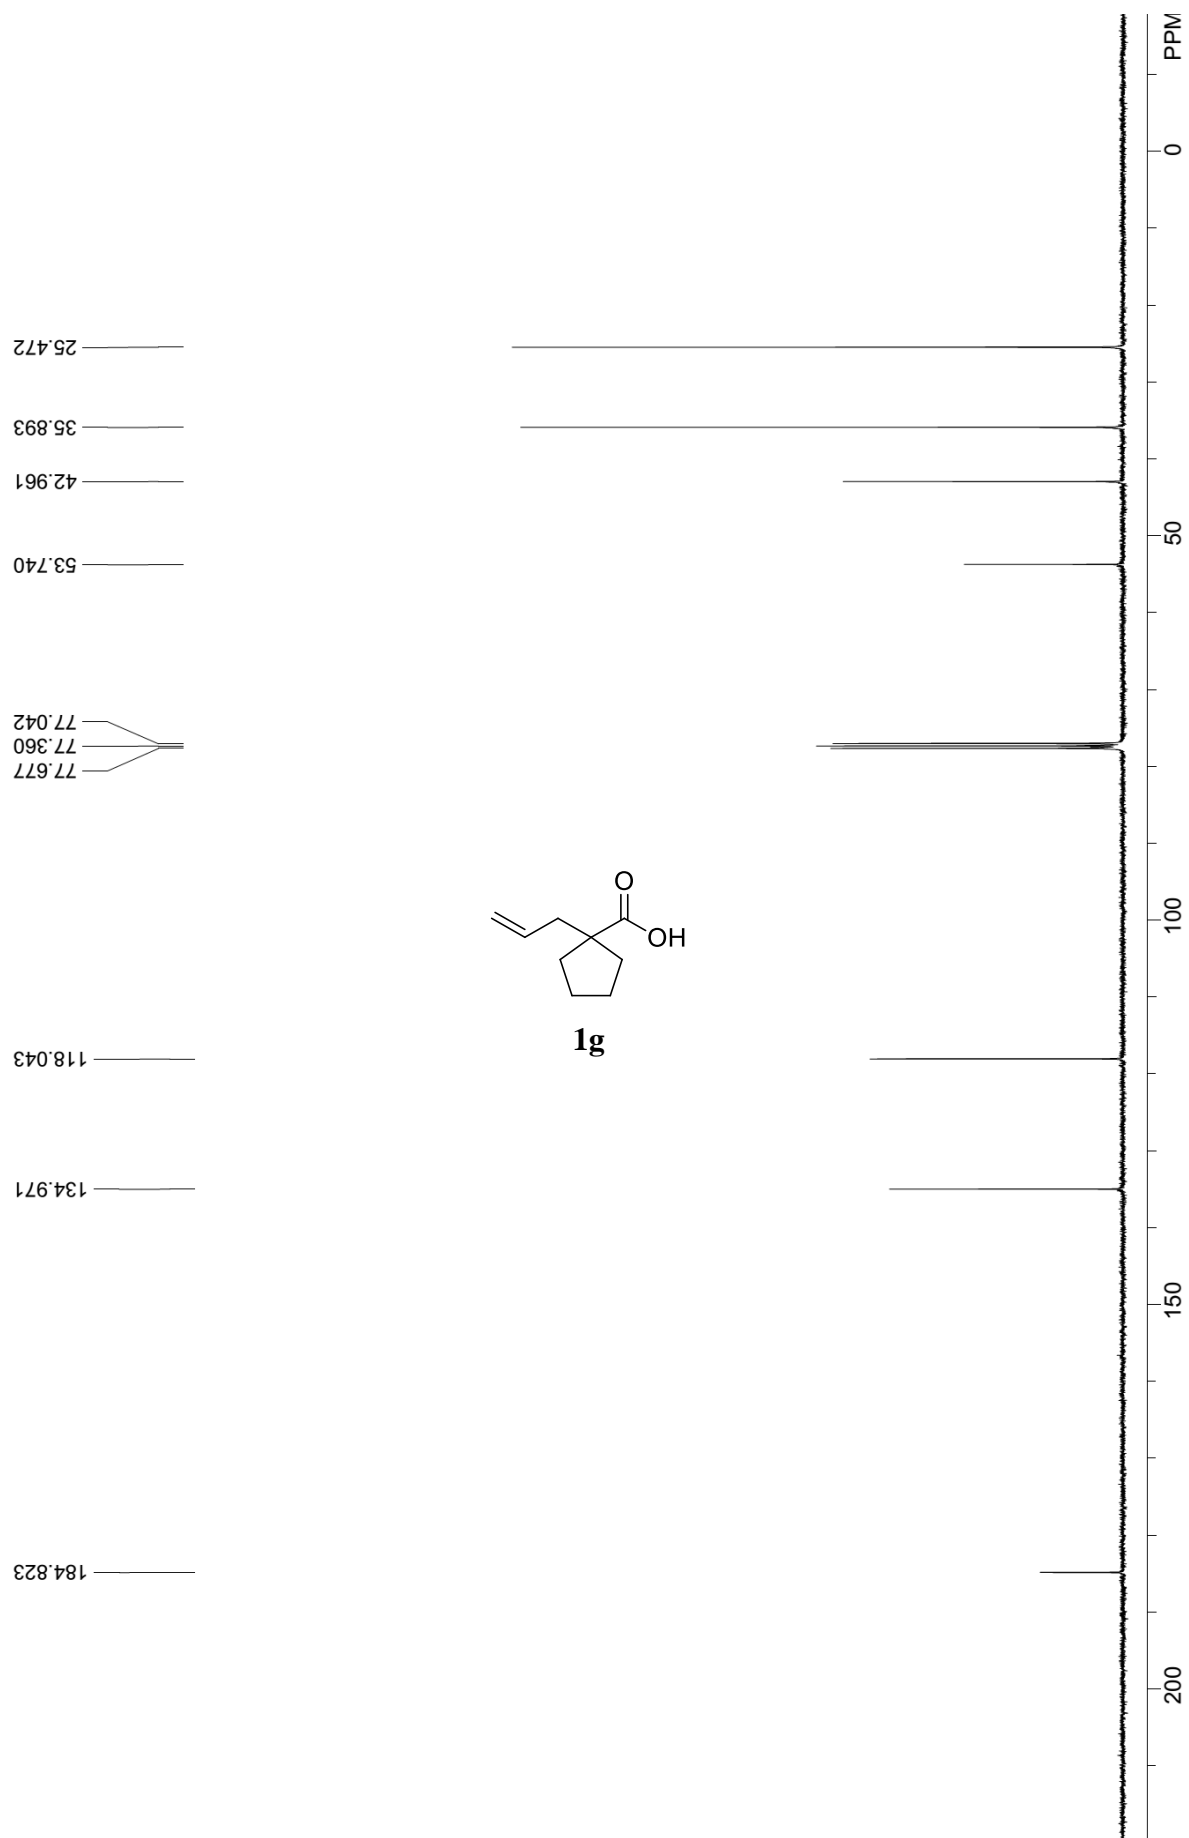

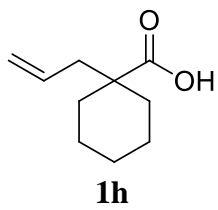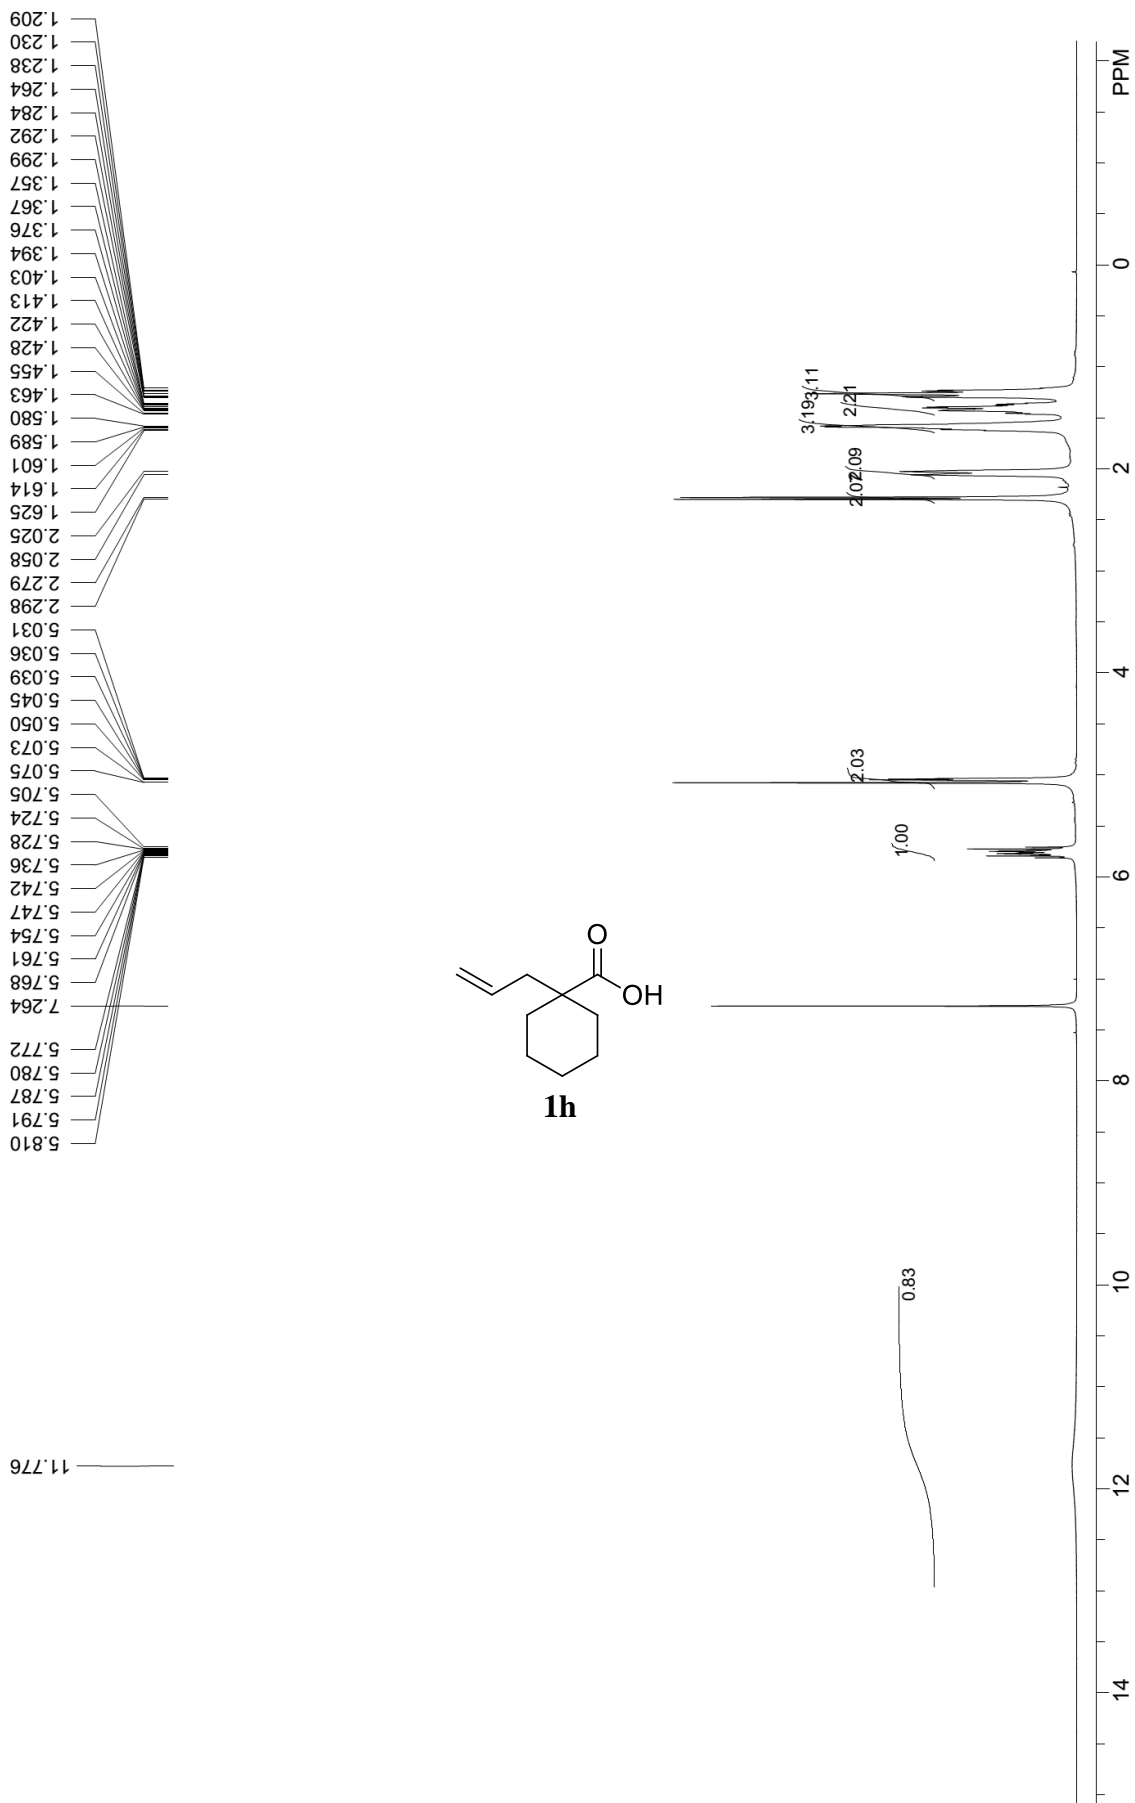



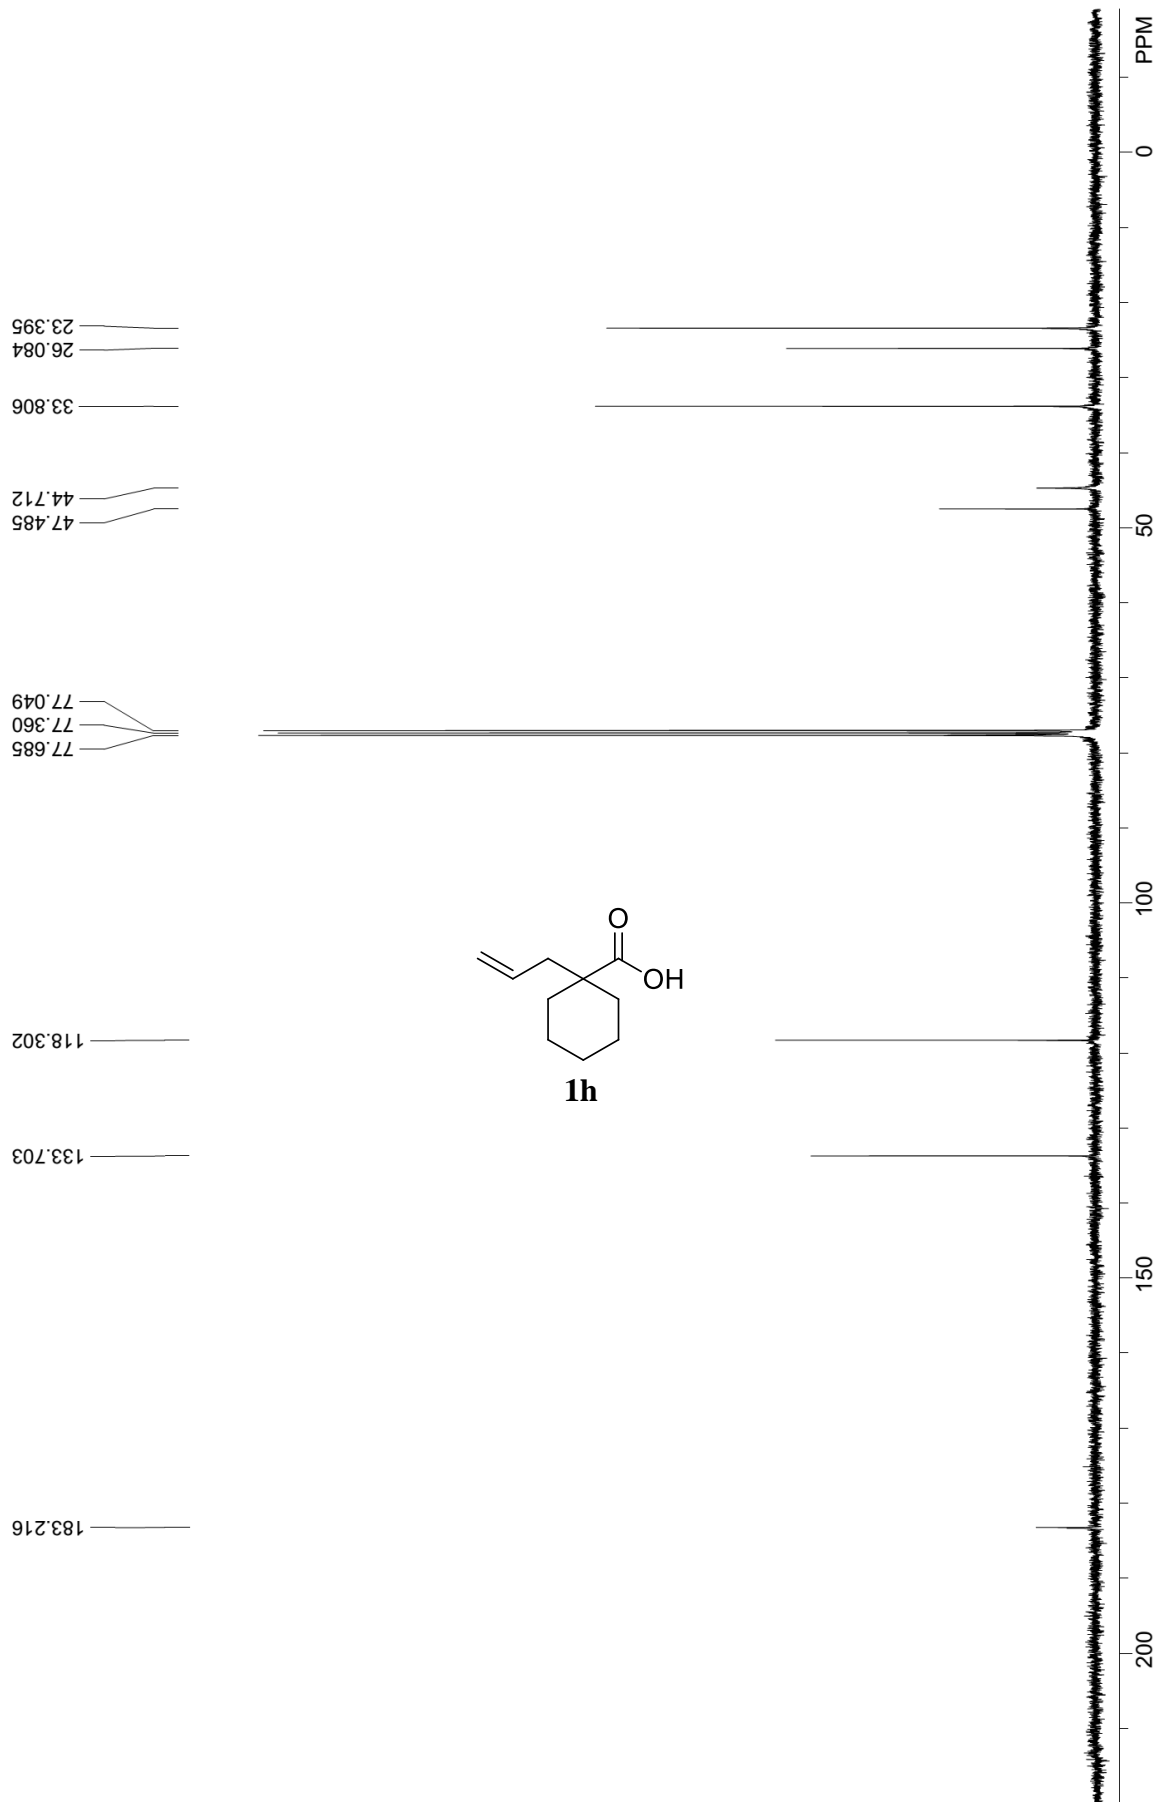

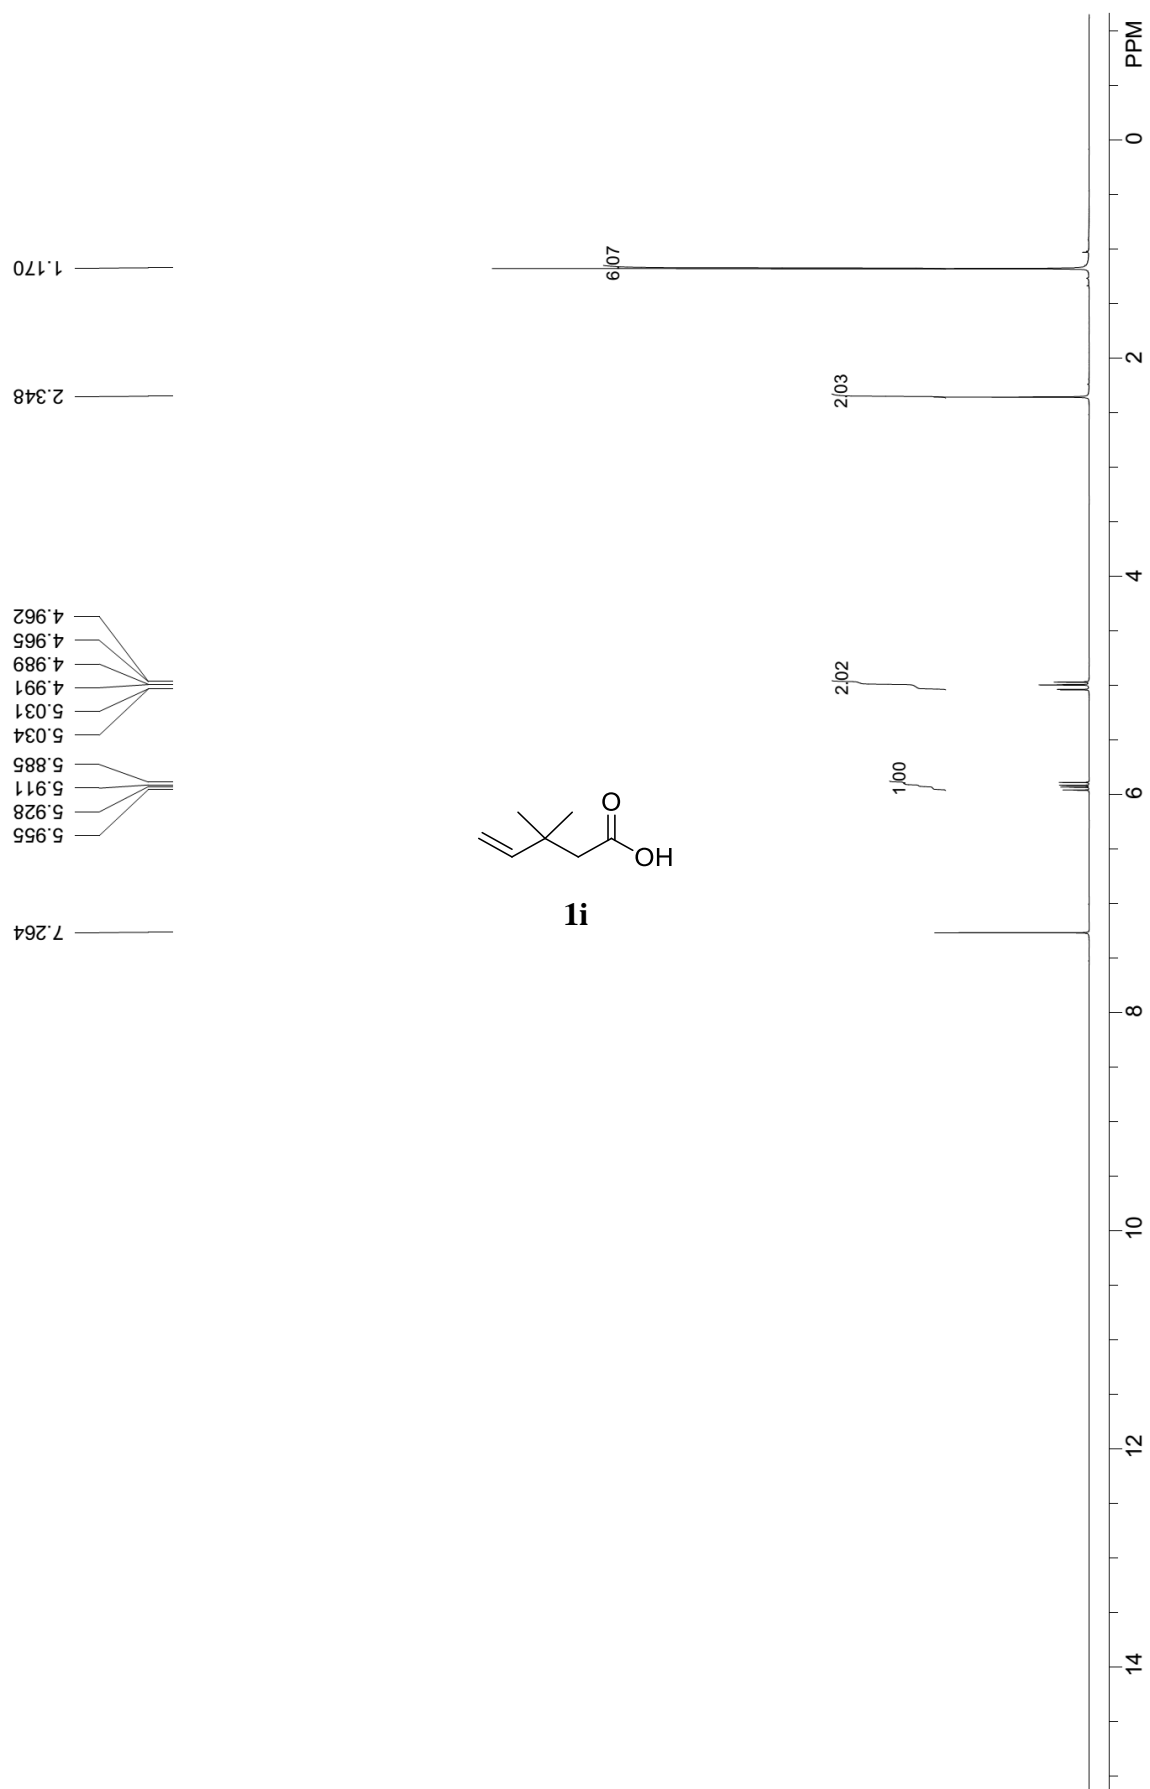

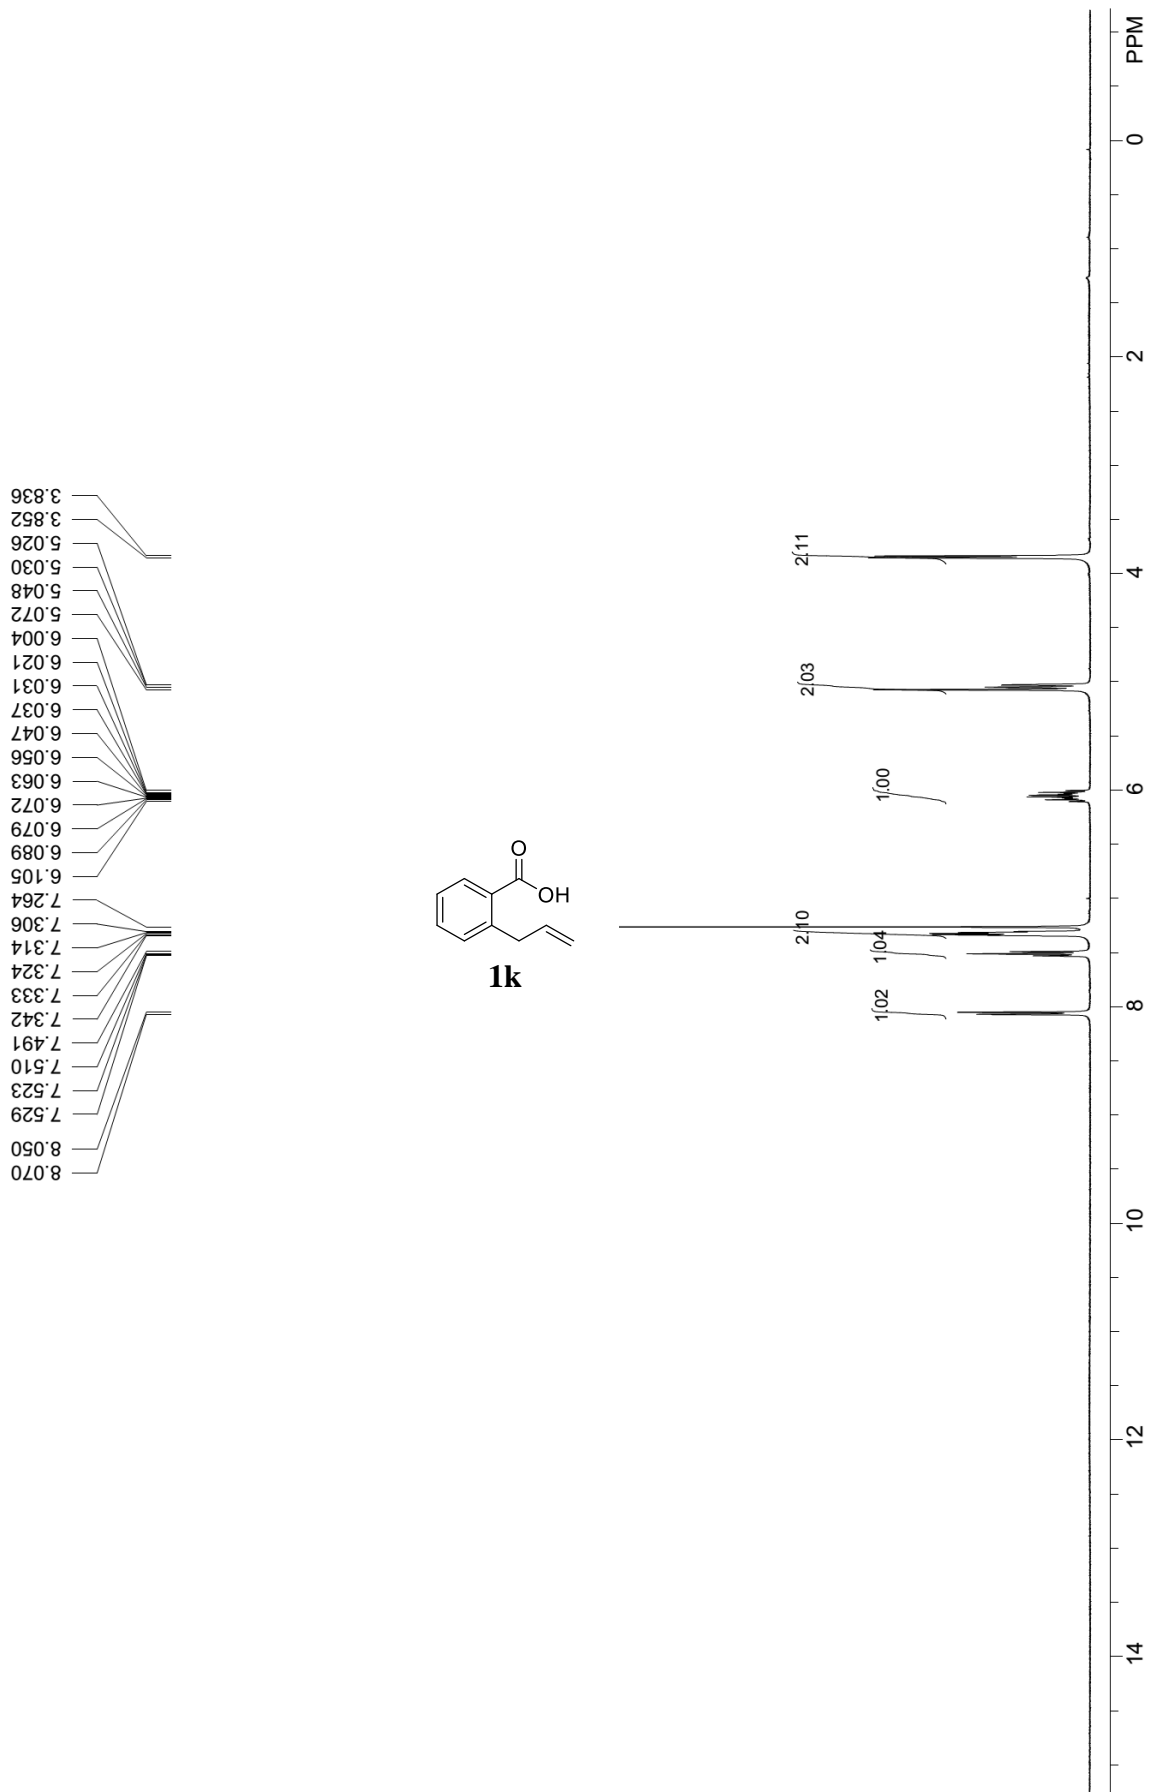

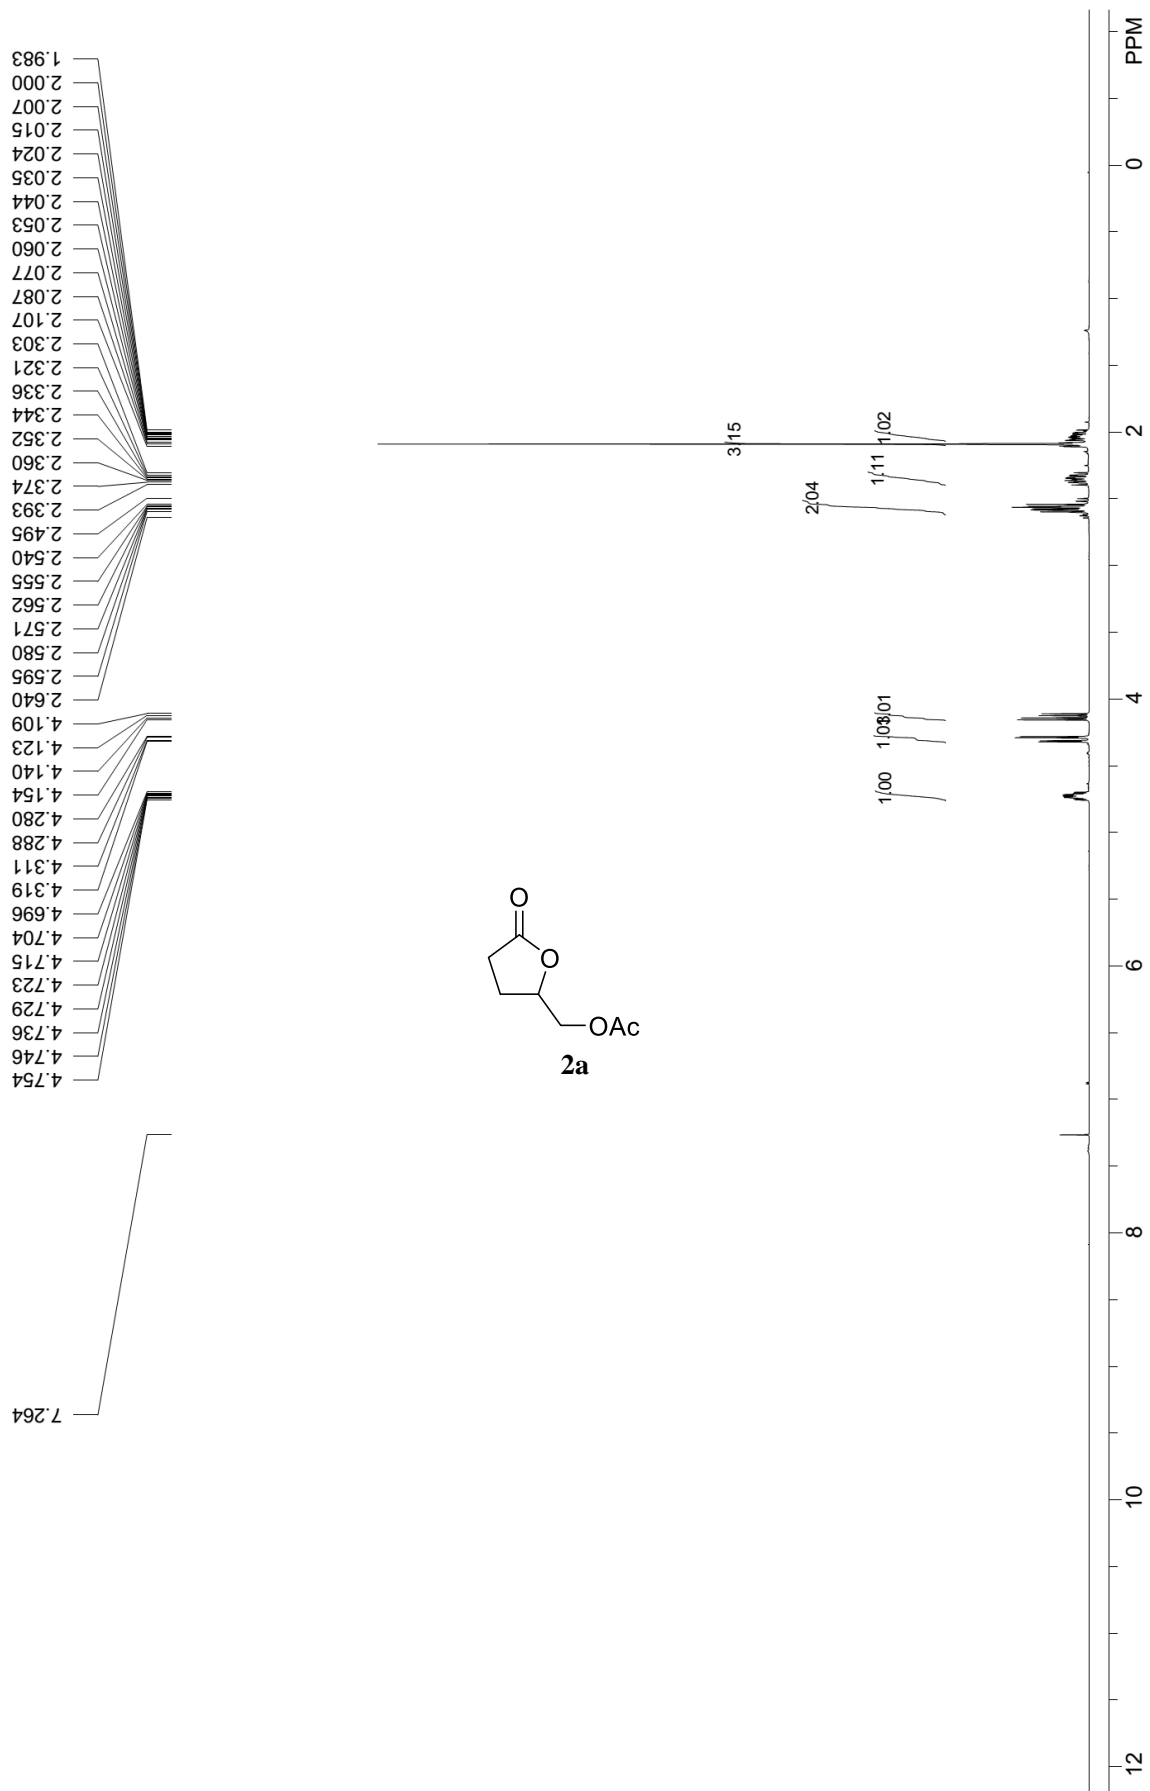

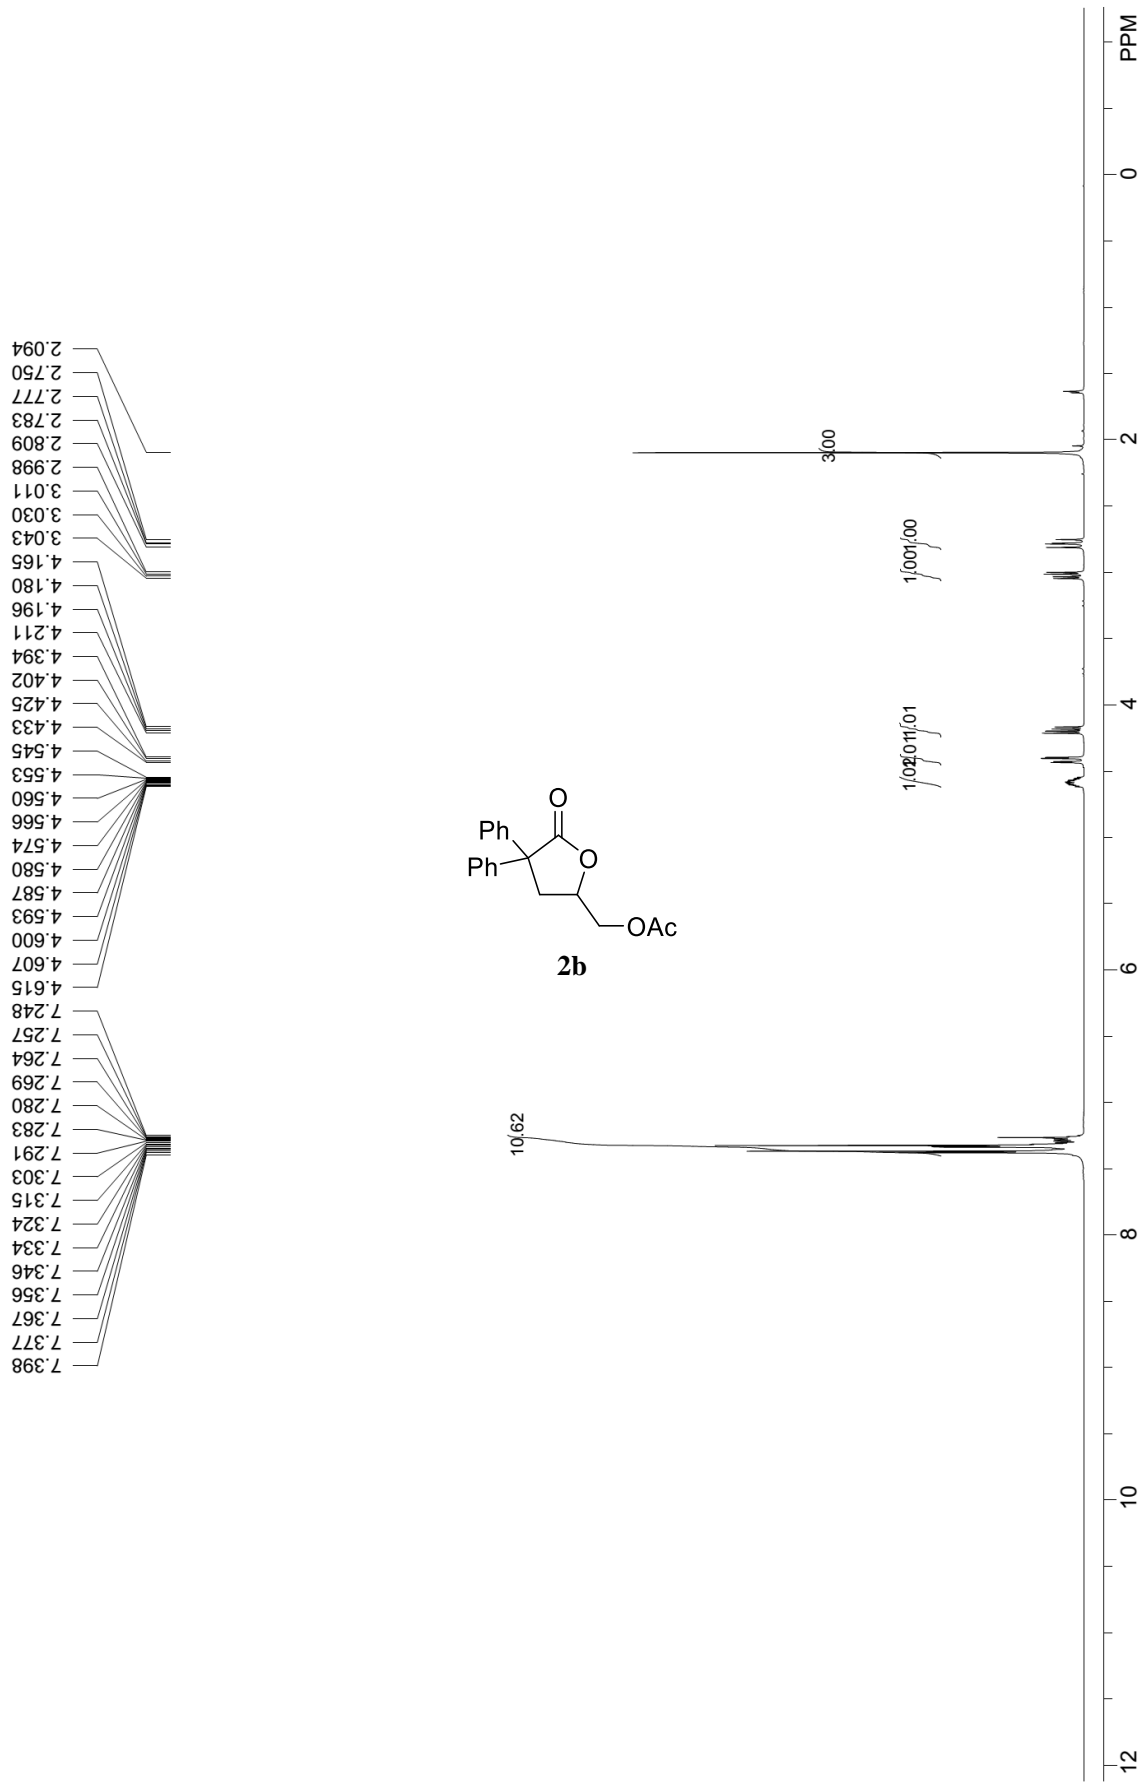



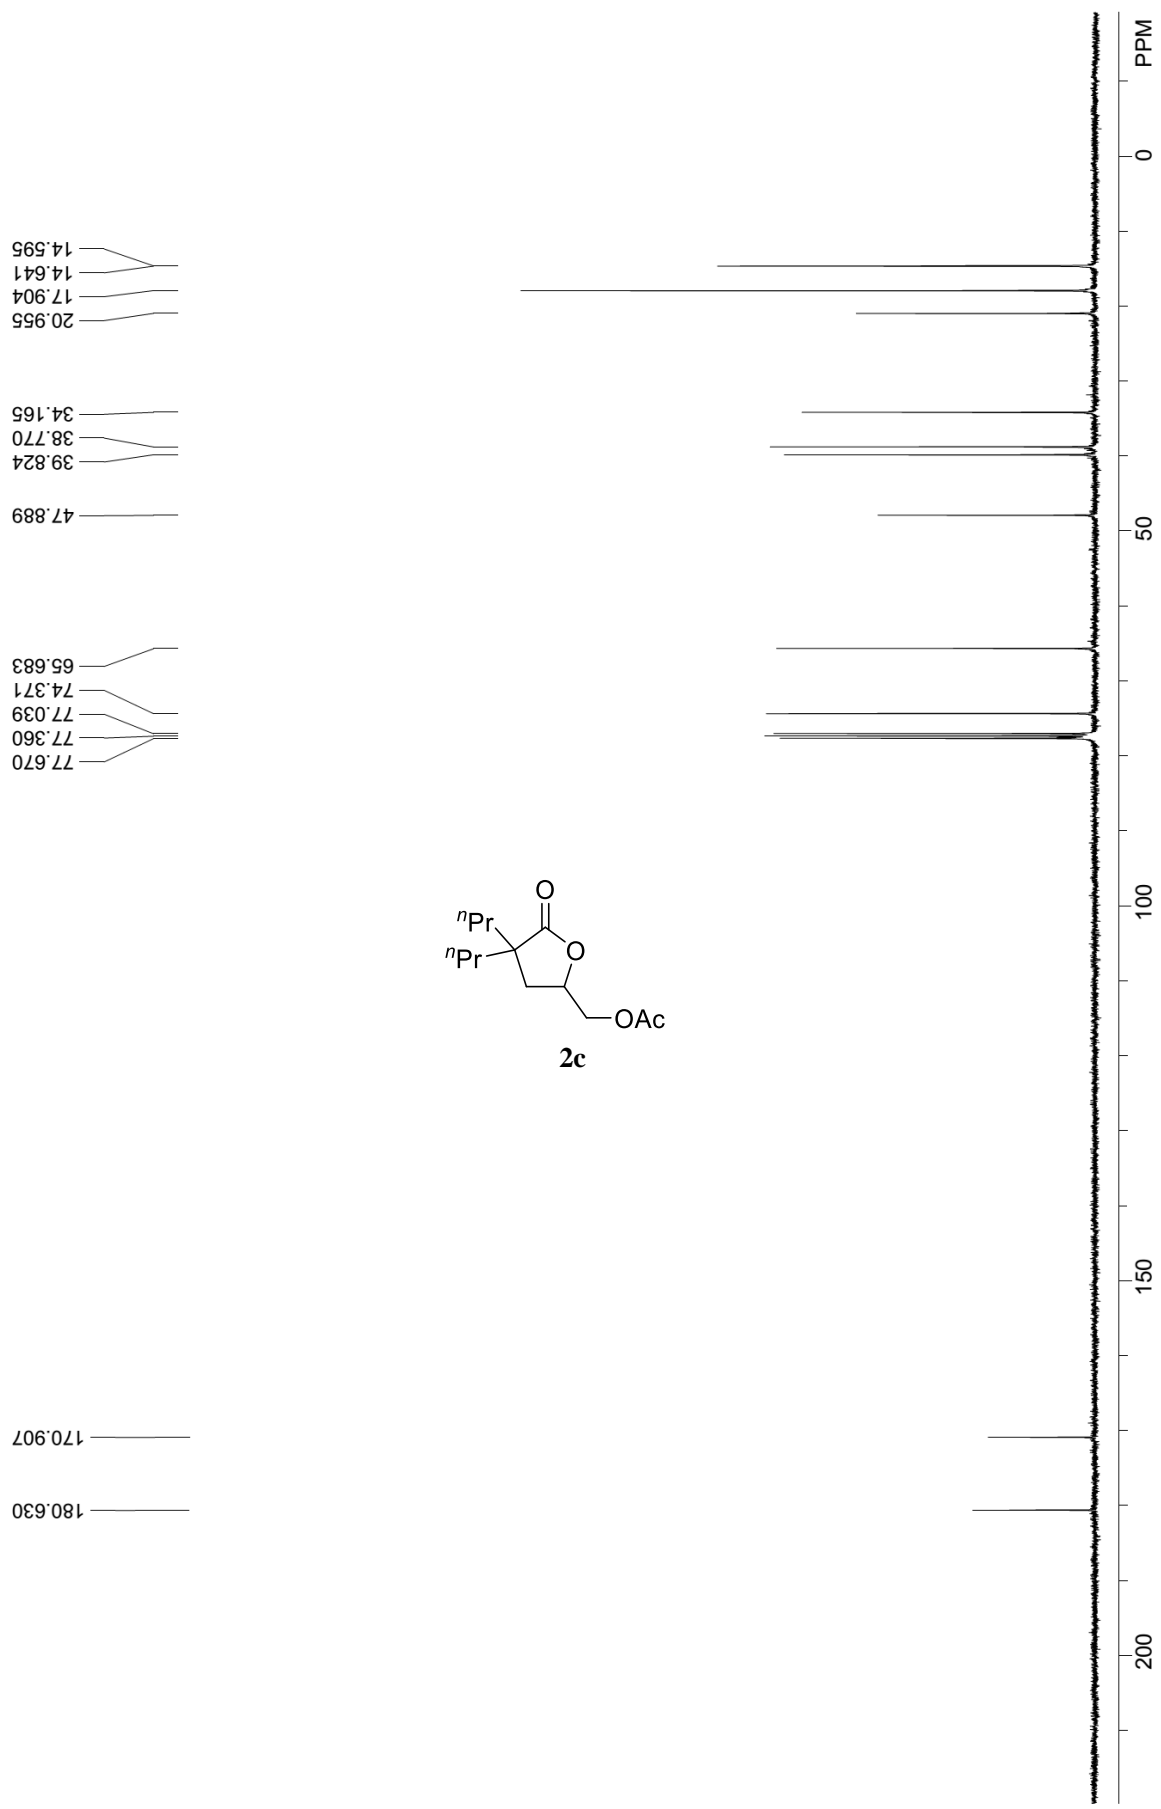

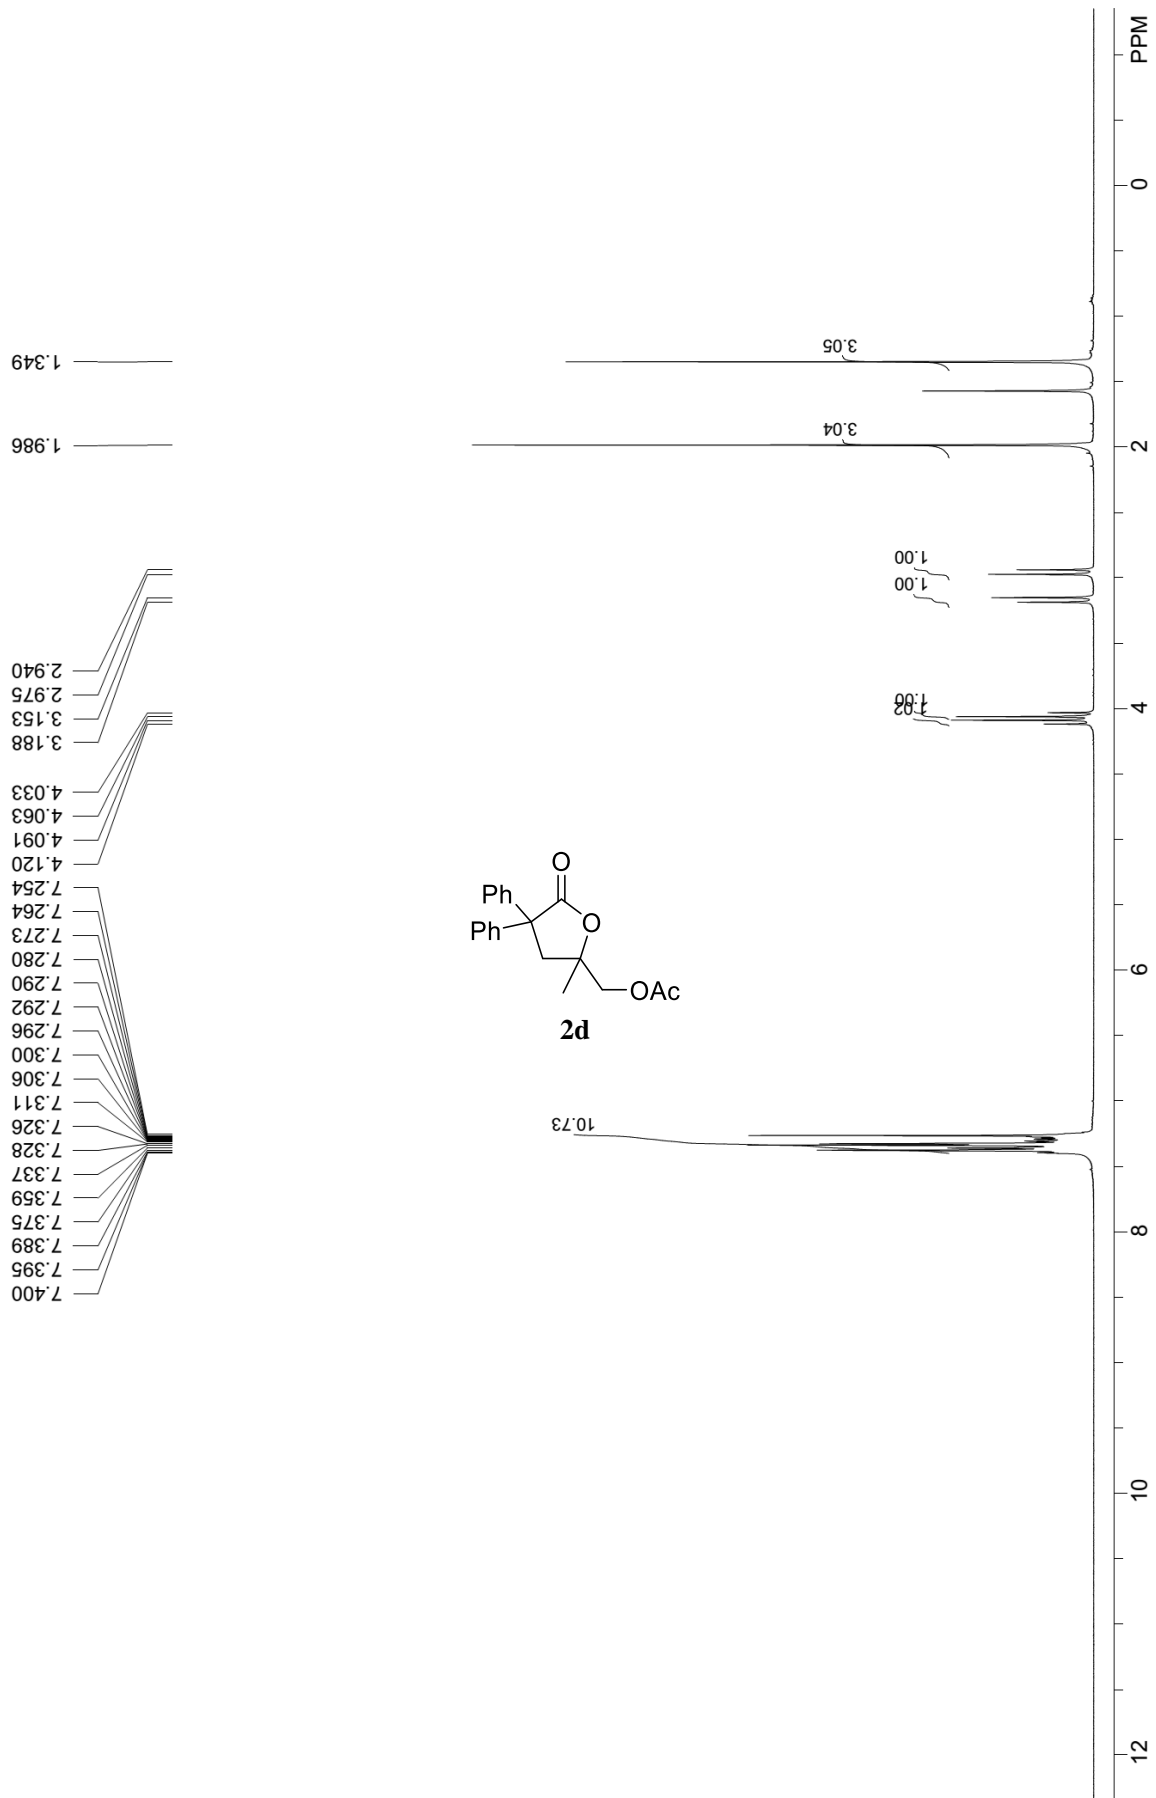



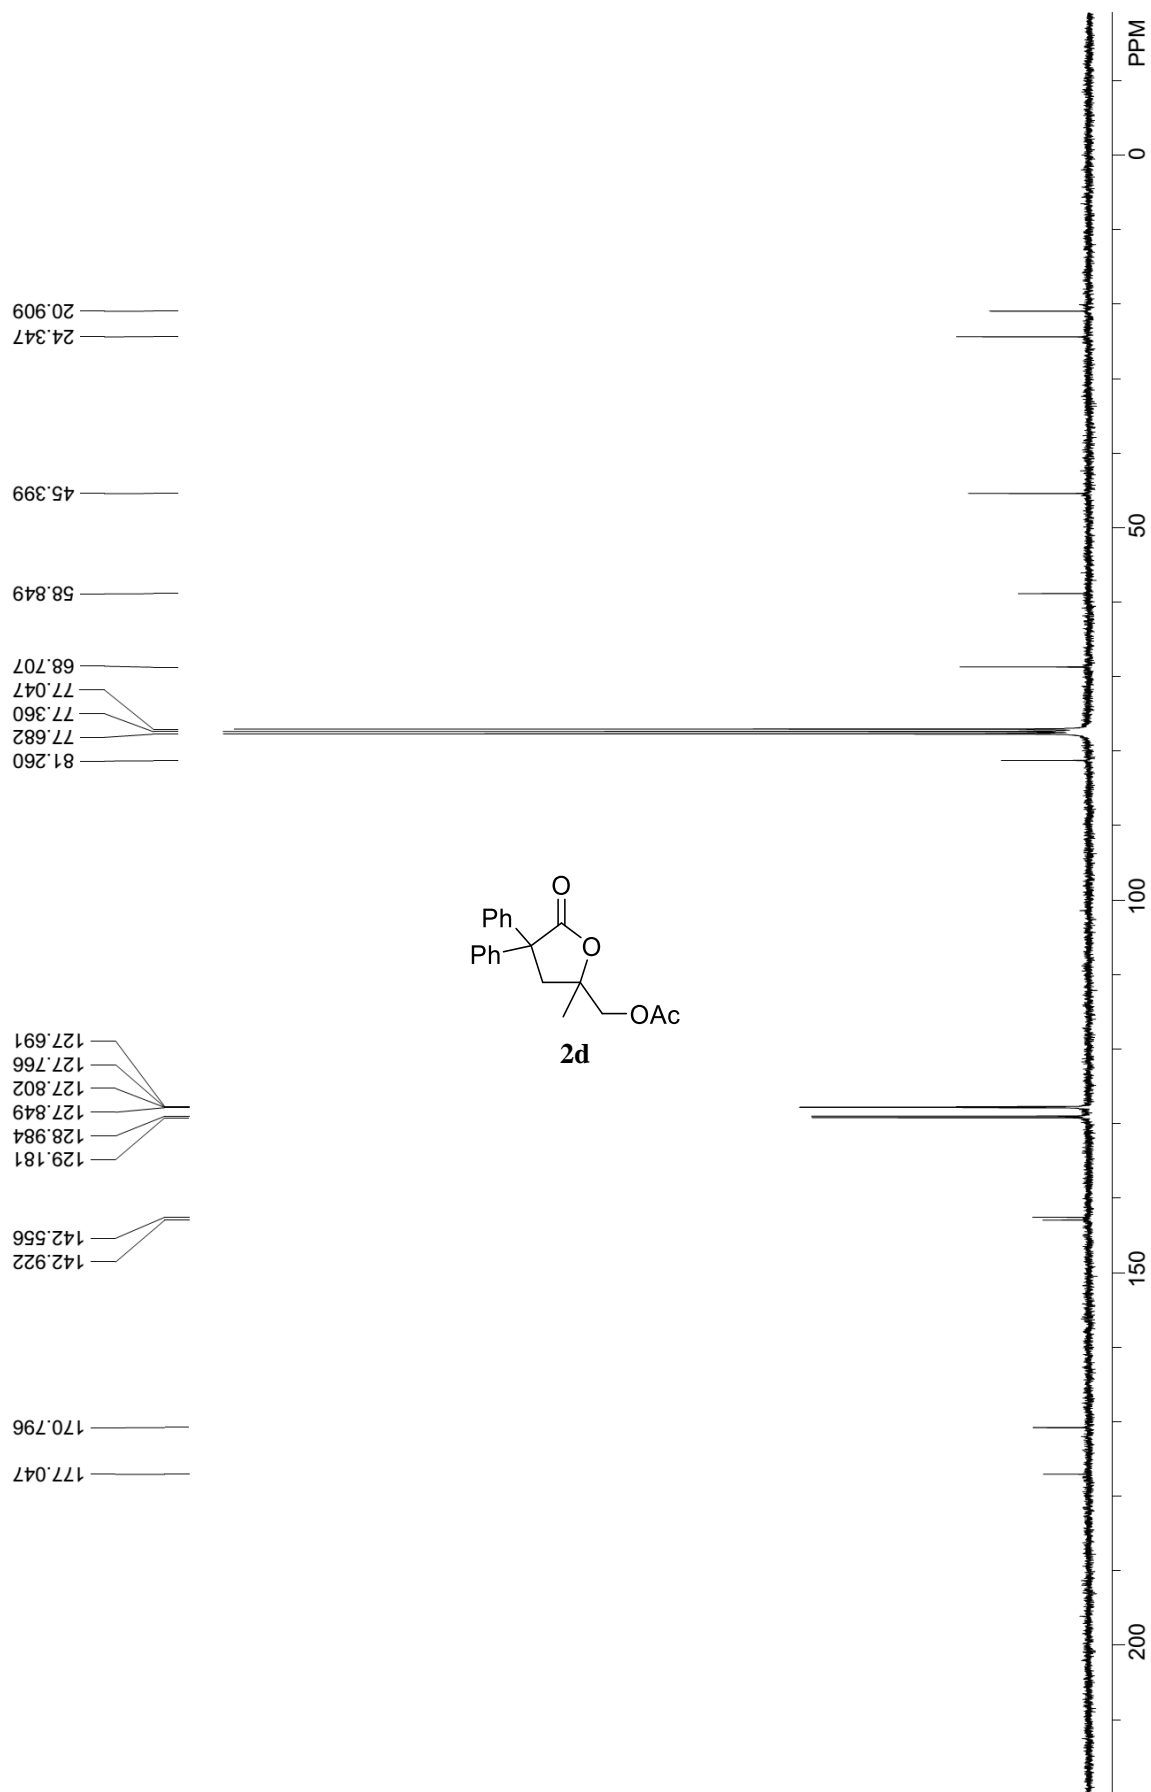

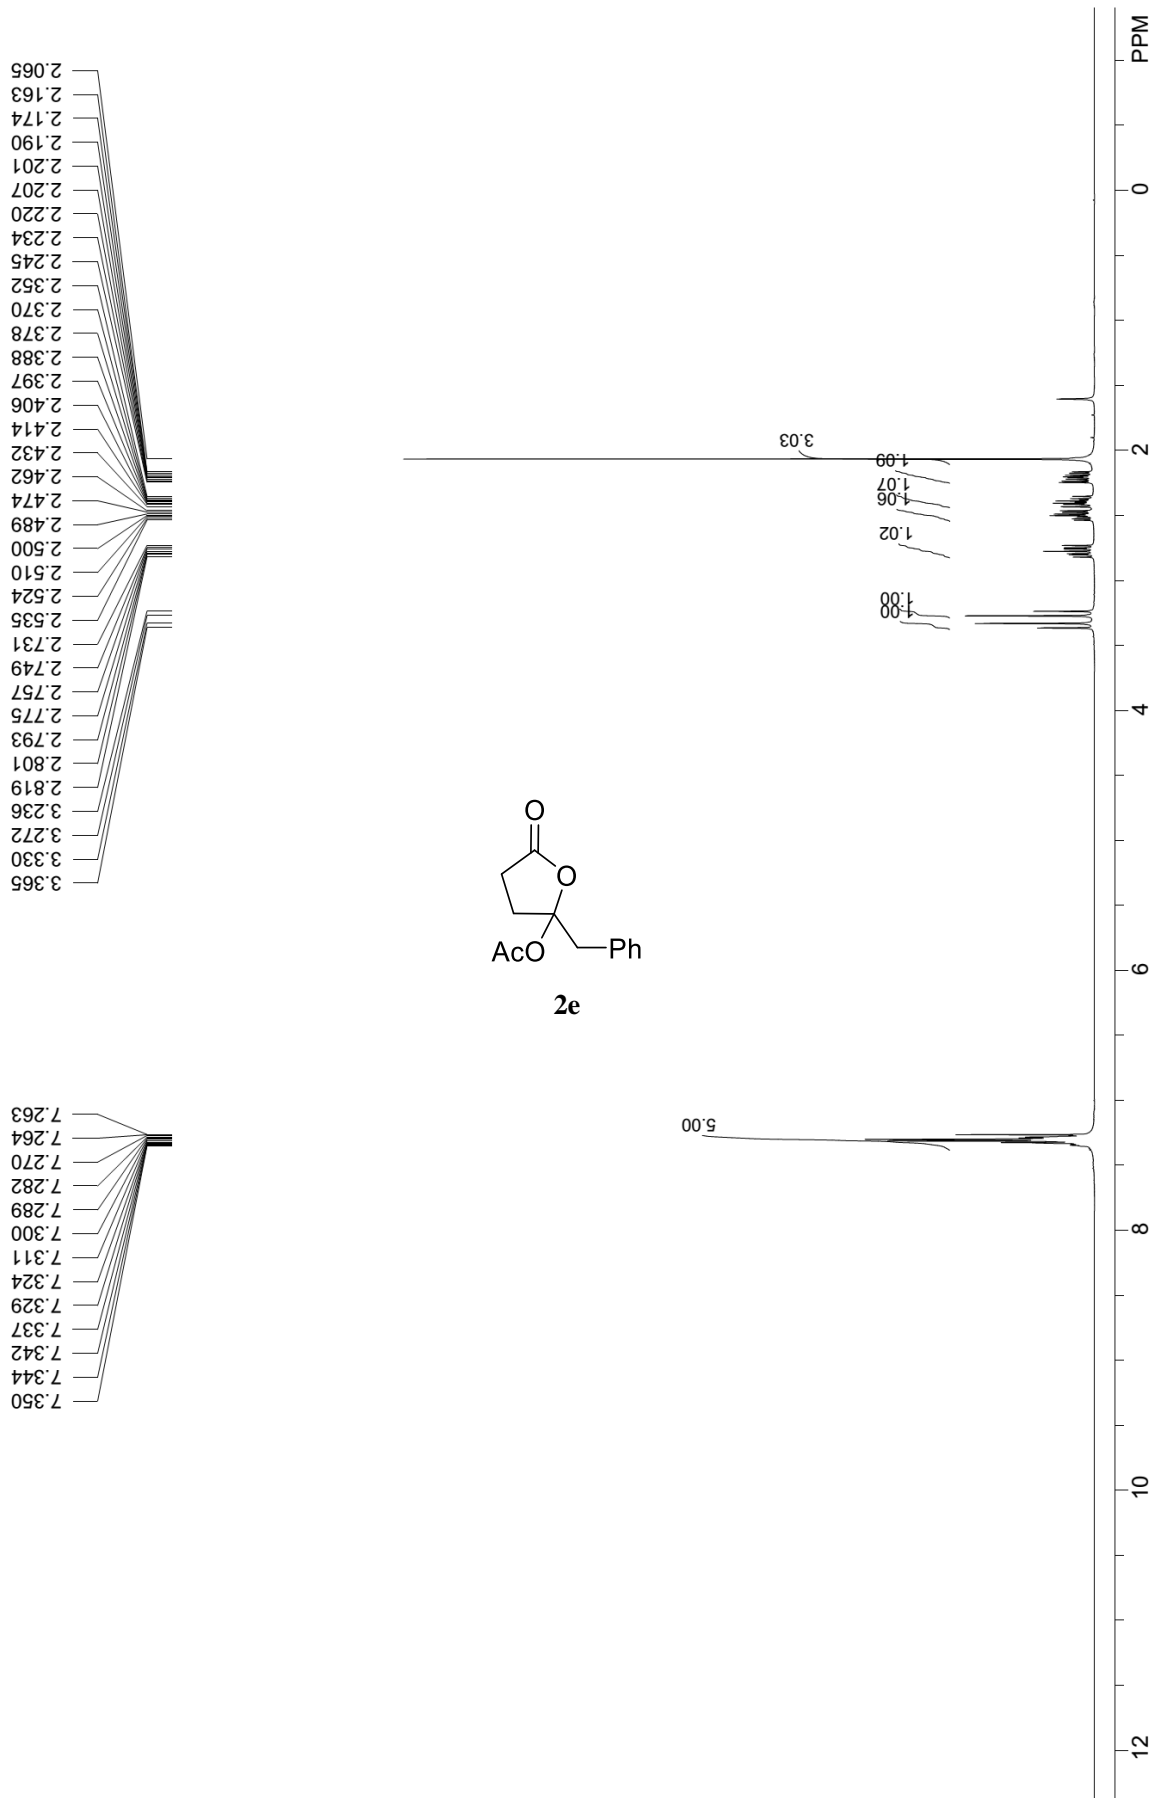



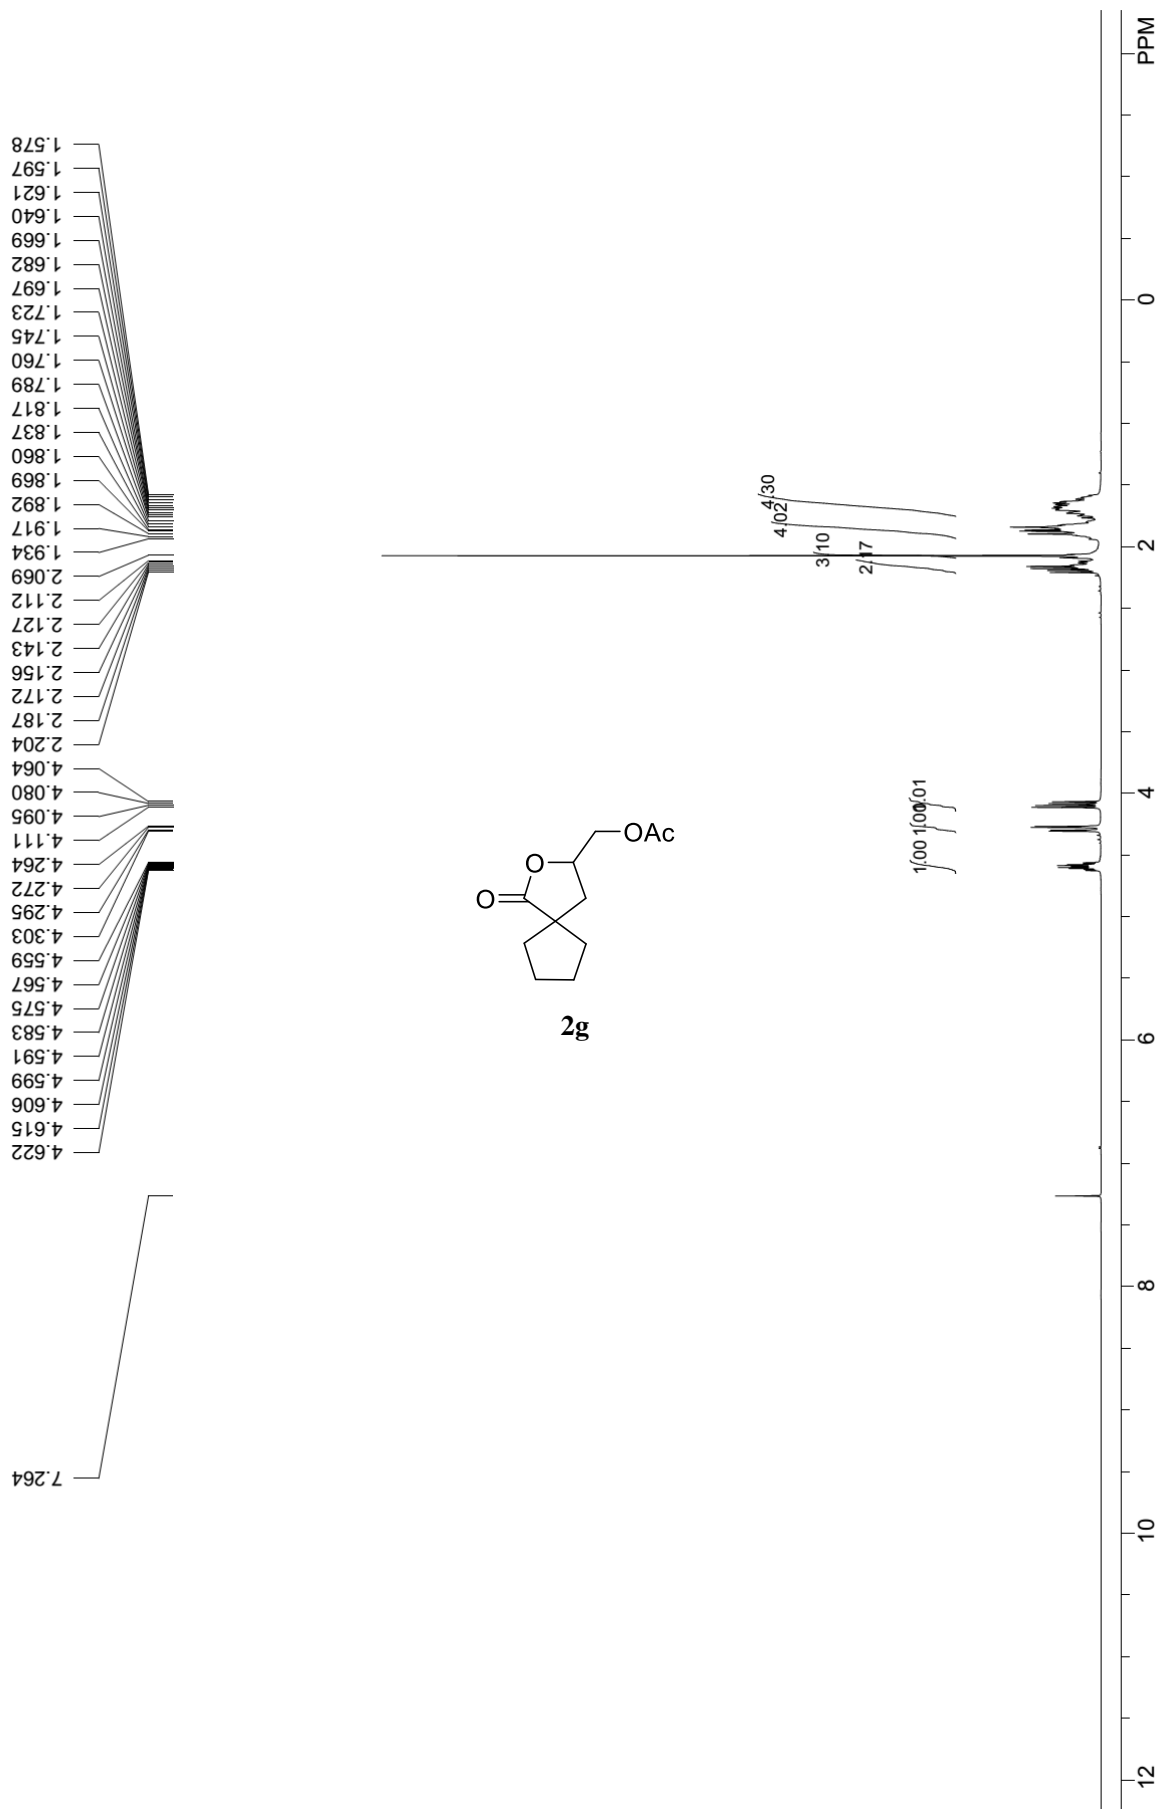

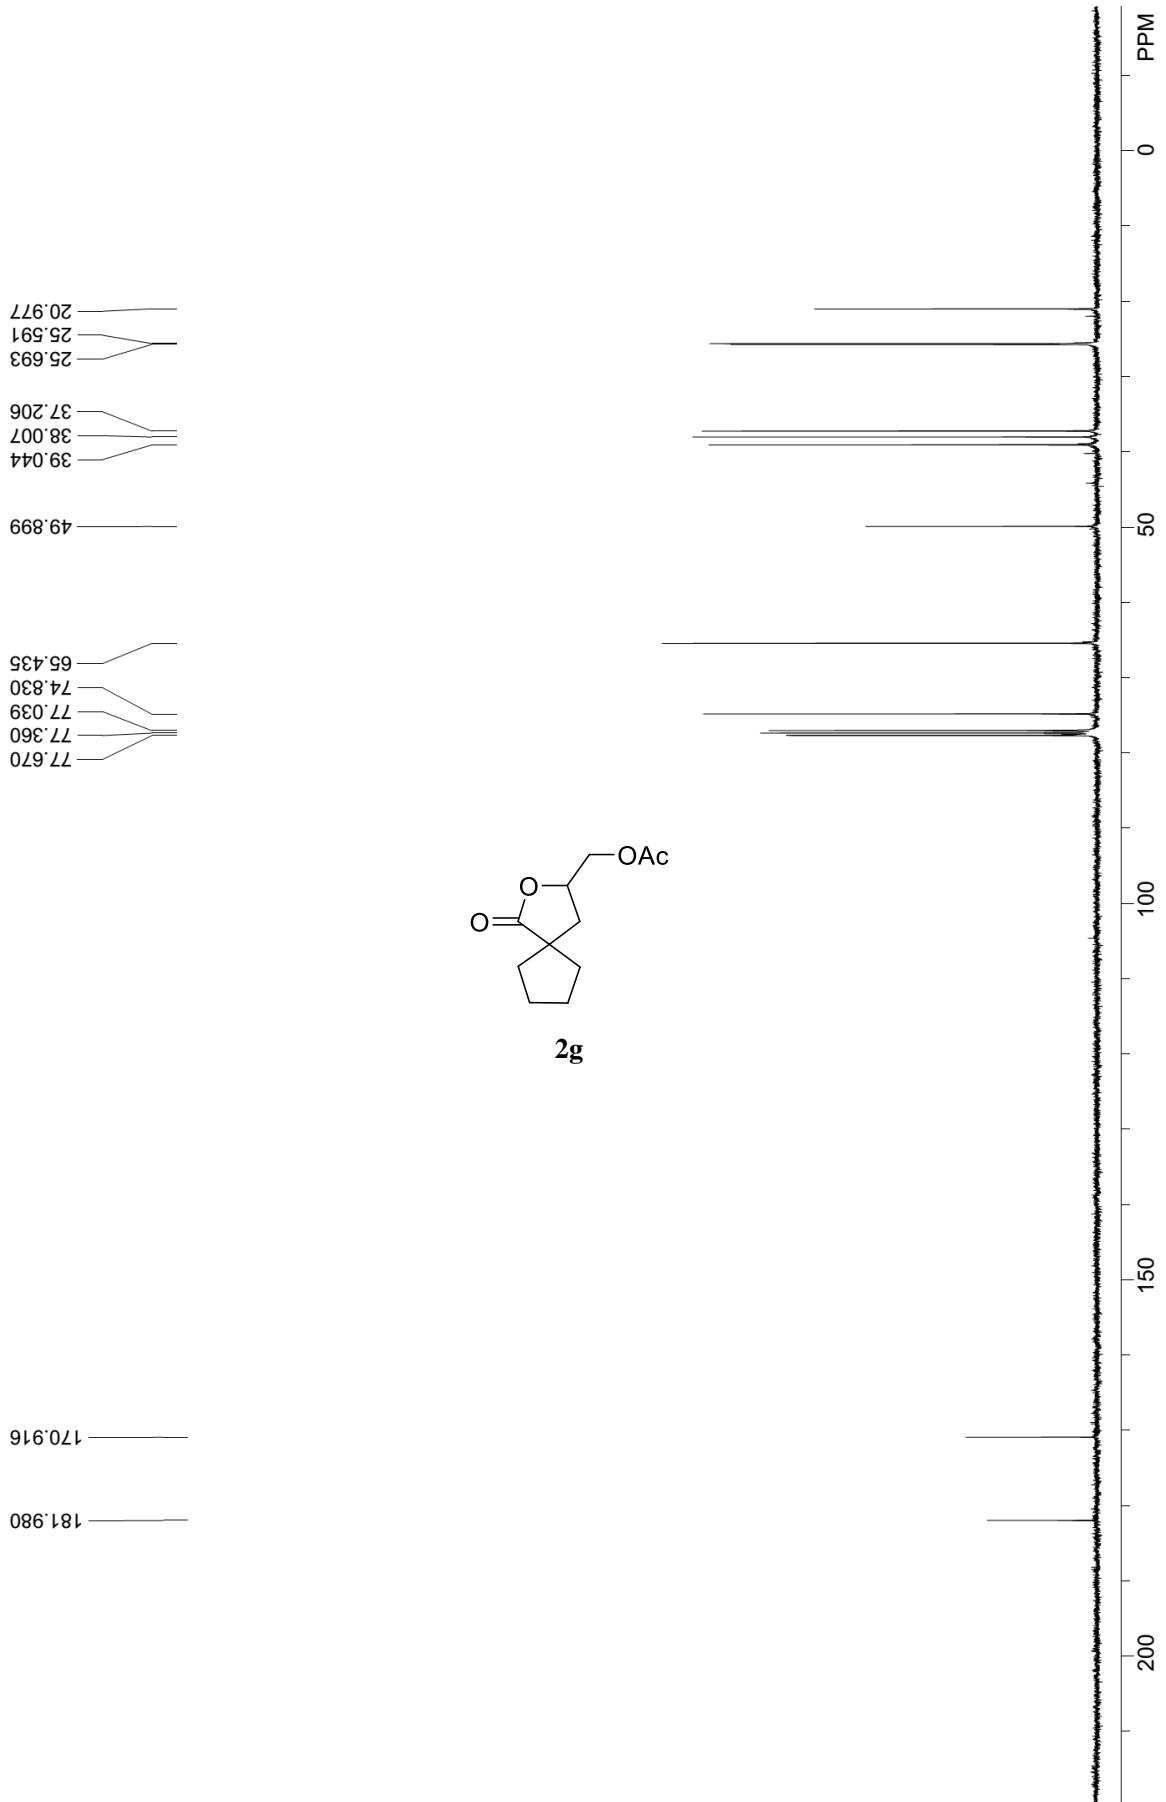

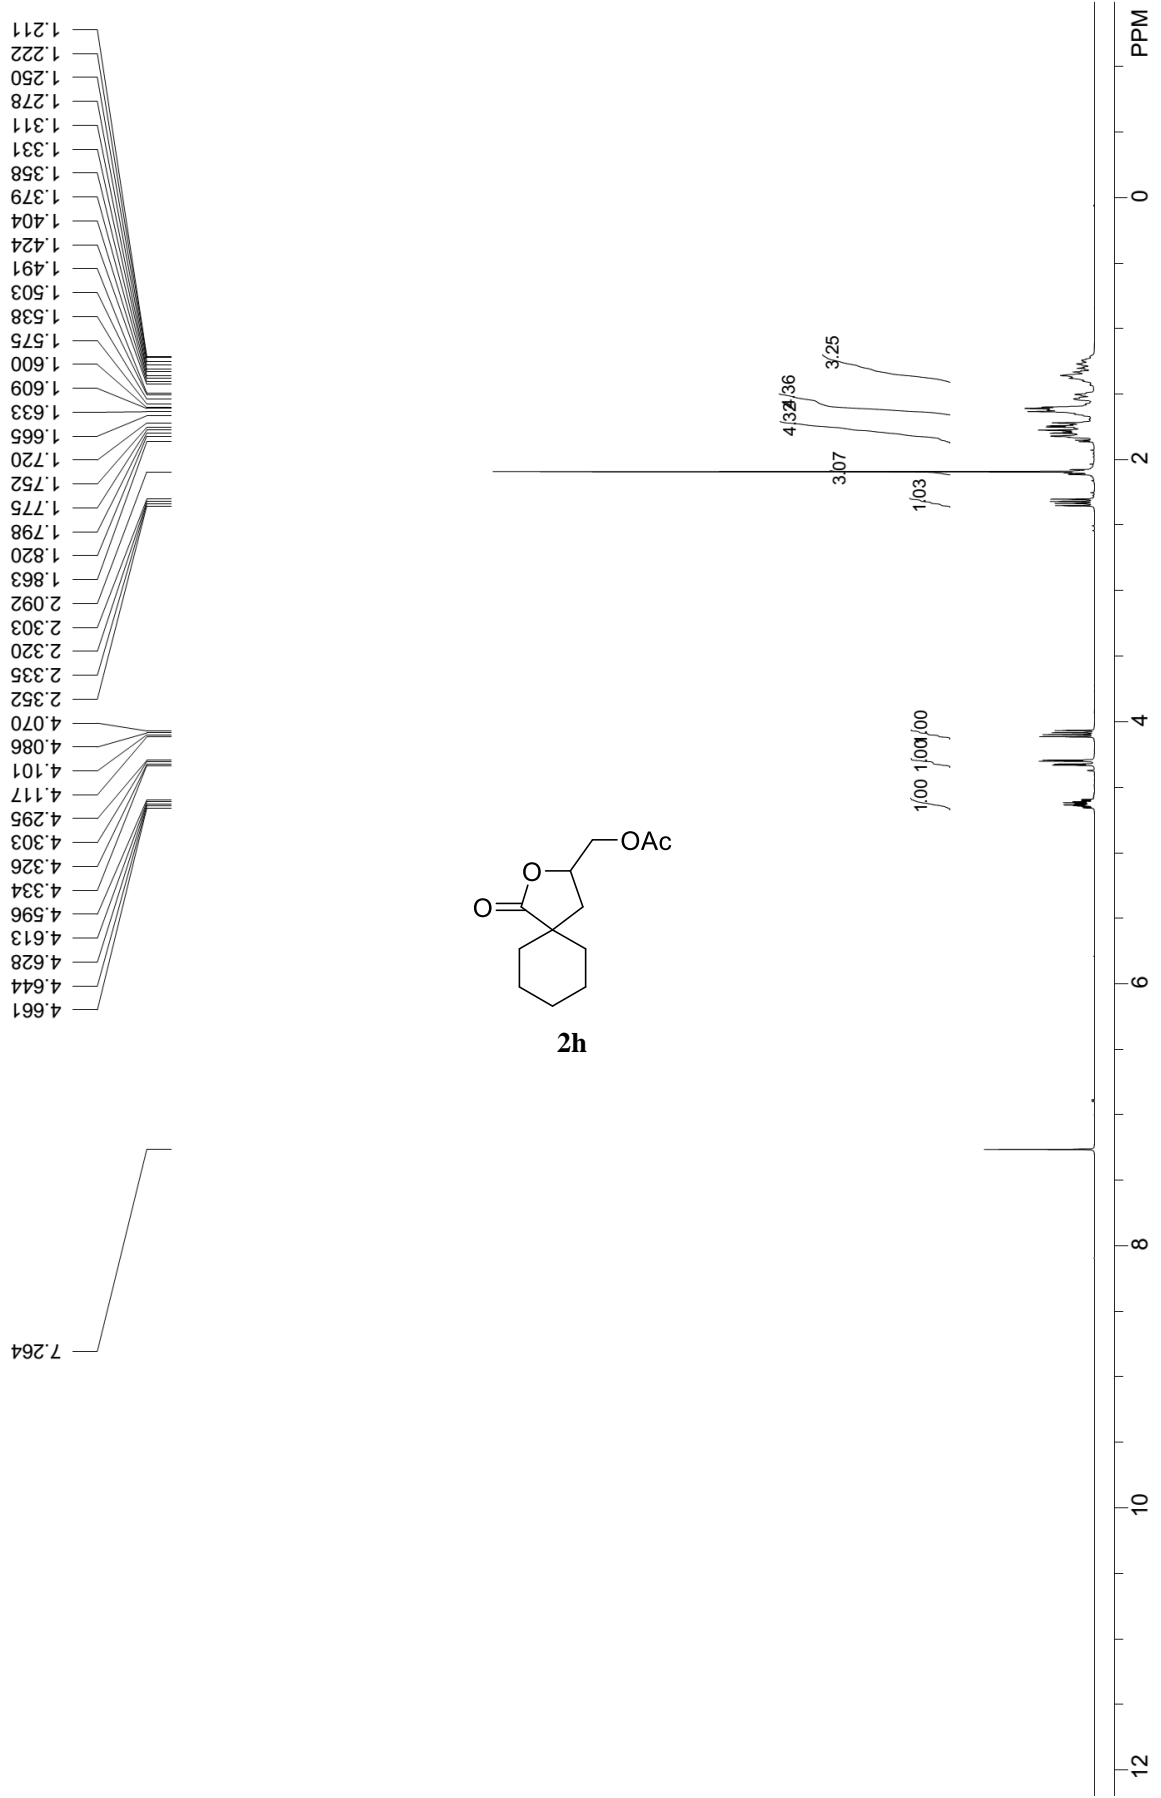

21.053  
22.374  
22.437  
25.514  
32.330  
34.361  
35.486  
44.745  
65.733  
74.532  
77.041  
77.360  
77.674

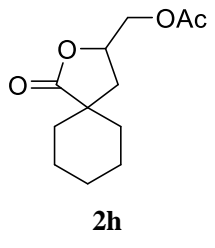

171.019  
181.117

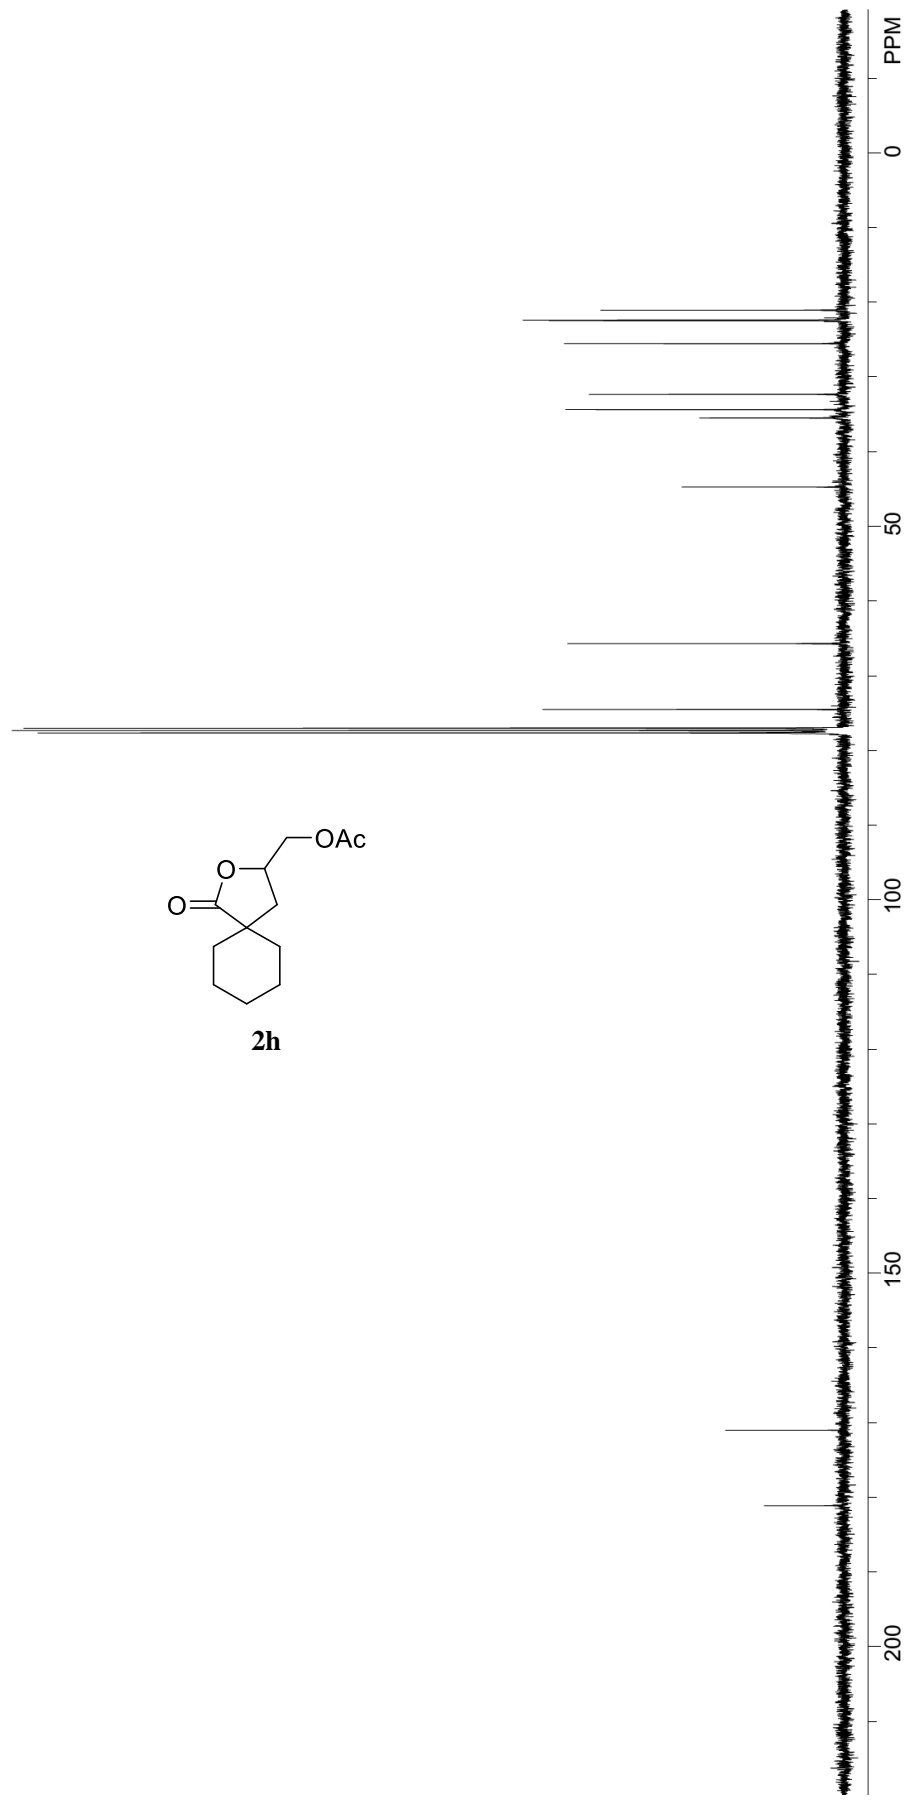

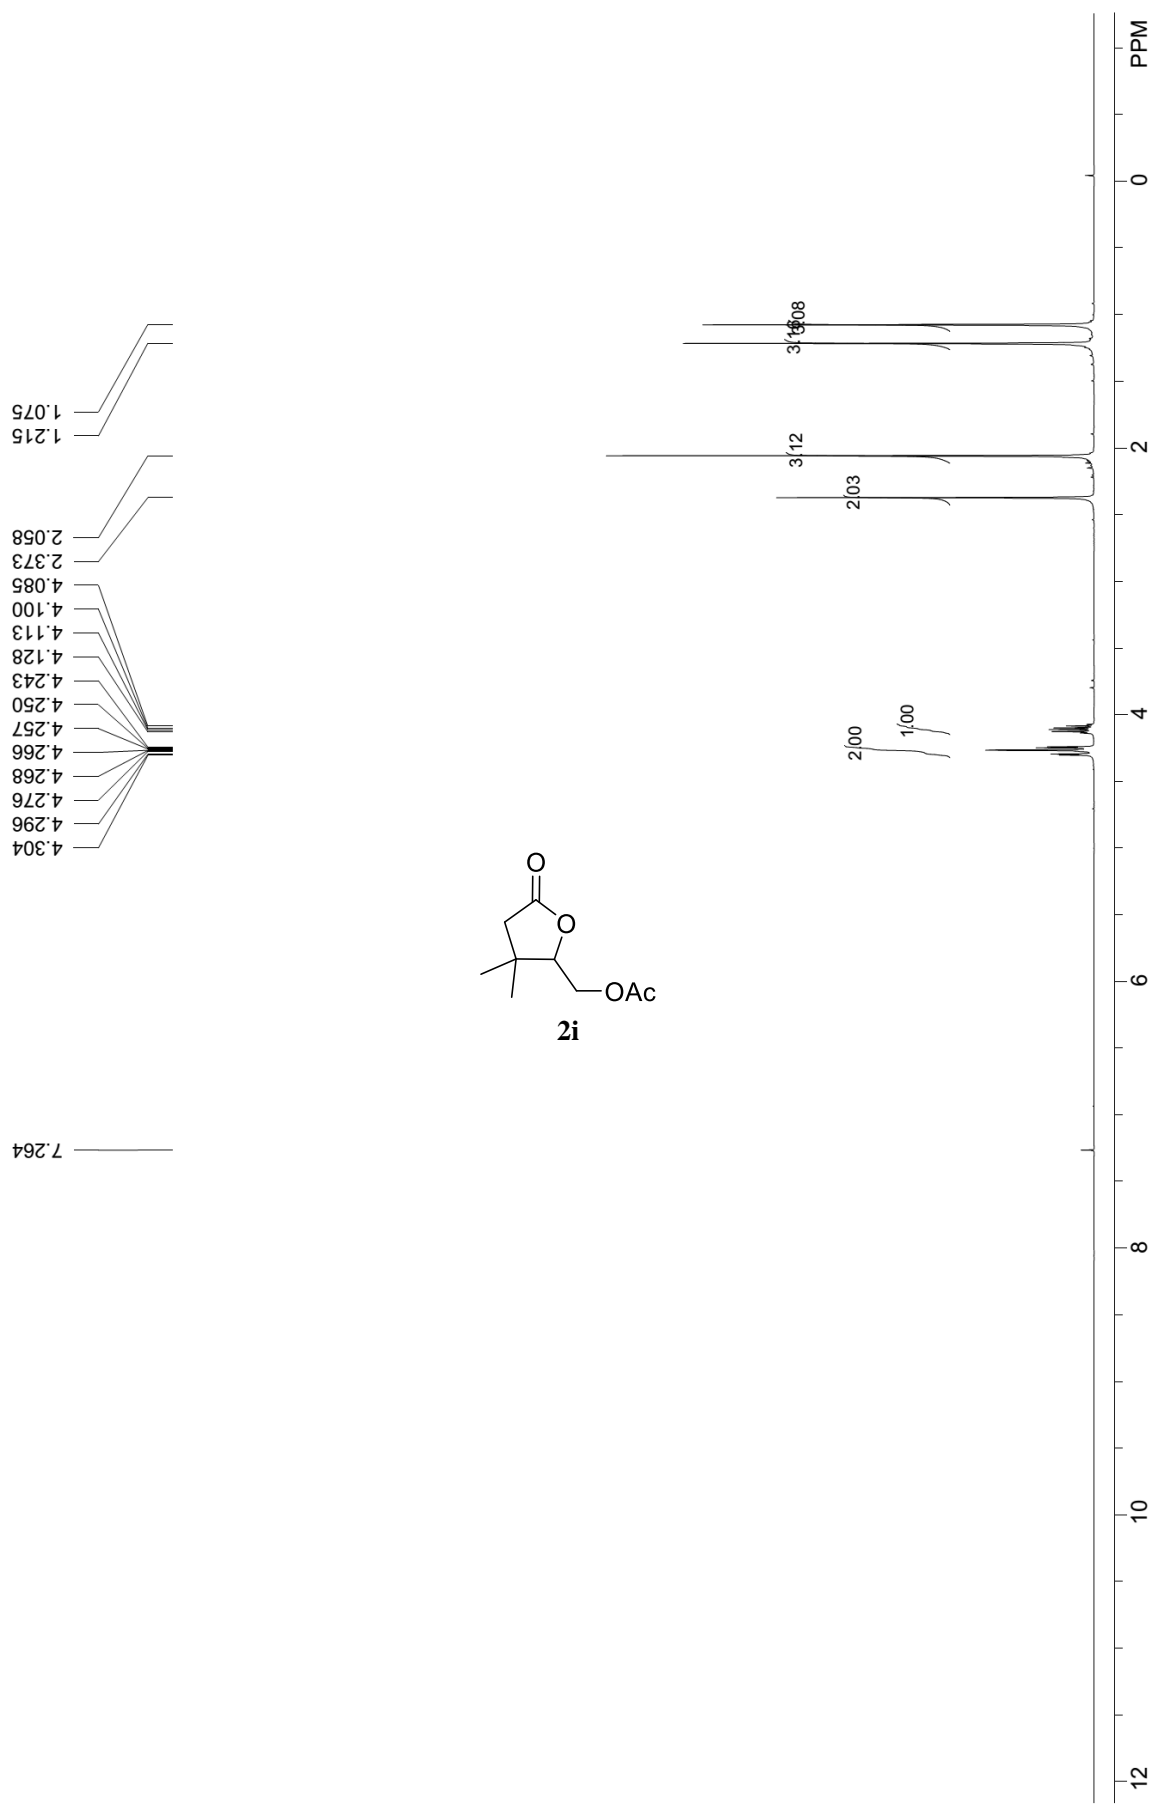



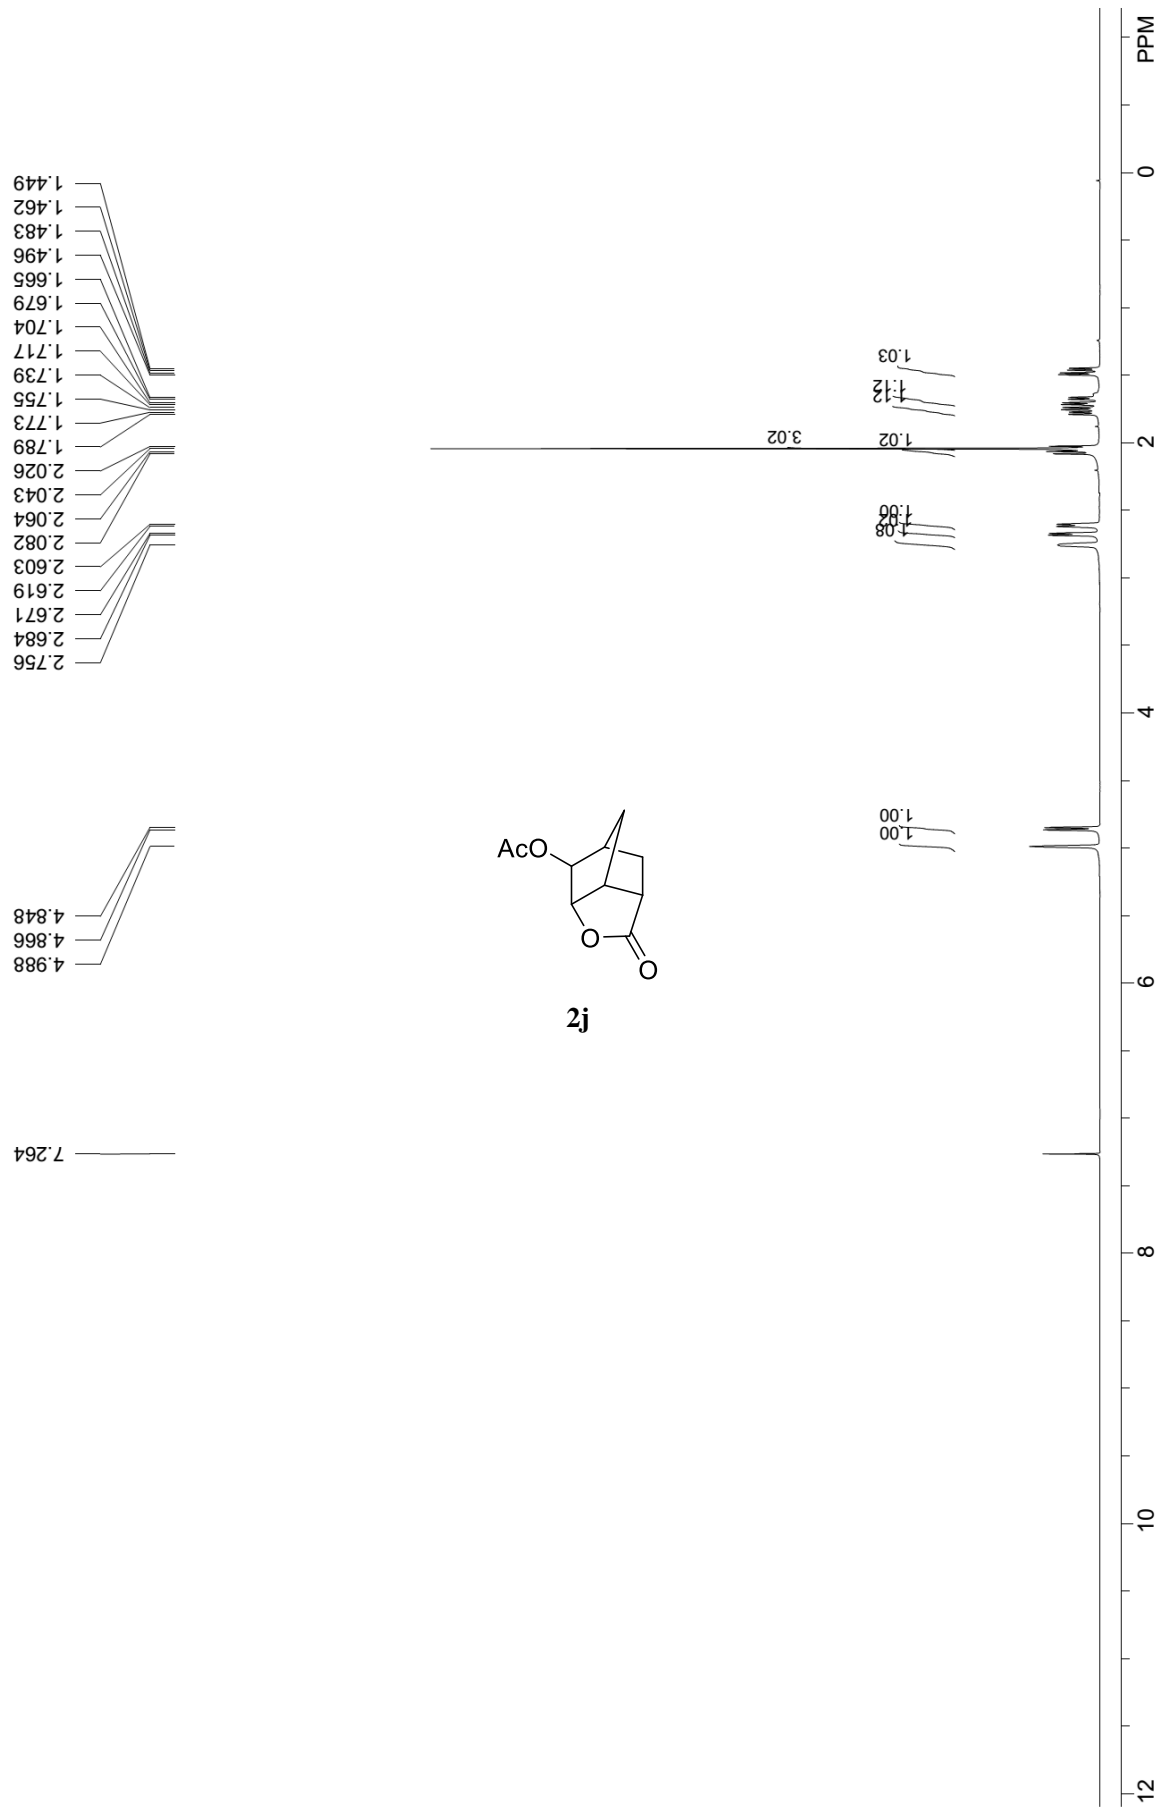

21.432  
25.357  
29.795

42.669  
43.670  
46.177

76.094  
77.039  
77.360  
77.671  
84.322

170.356

178.393

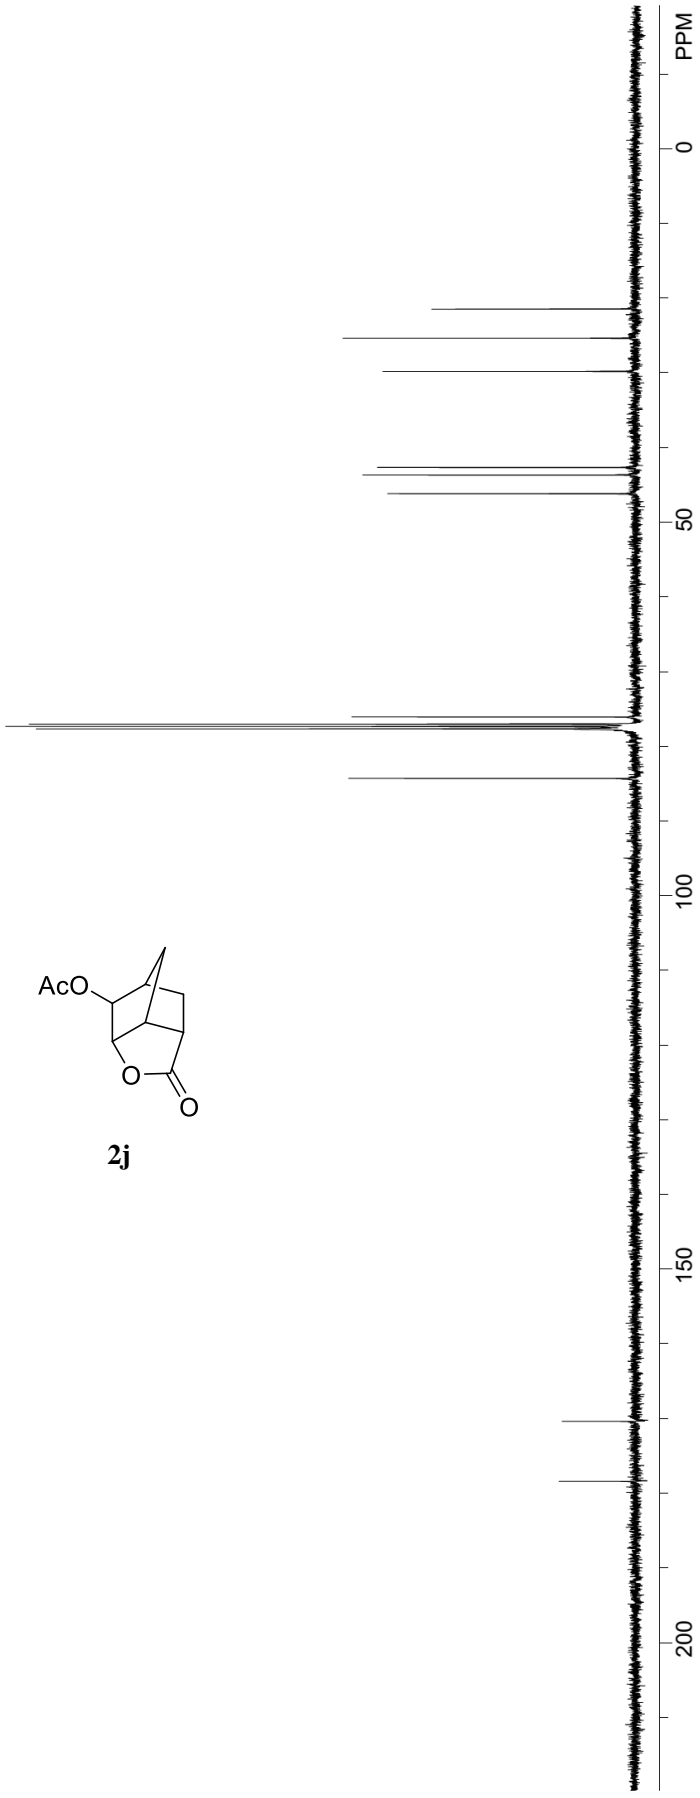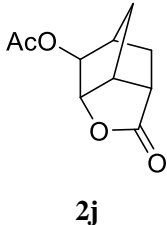

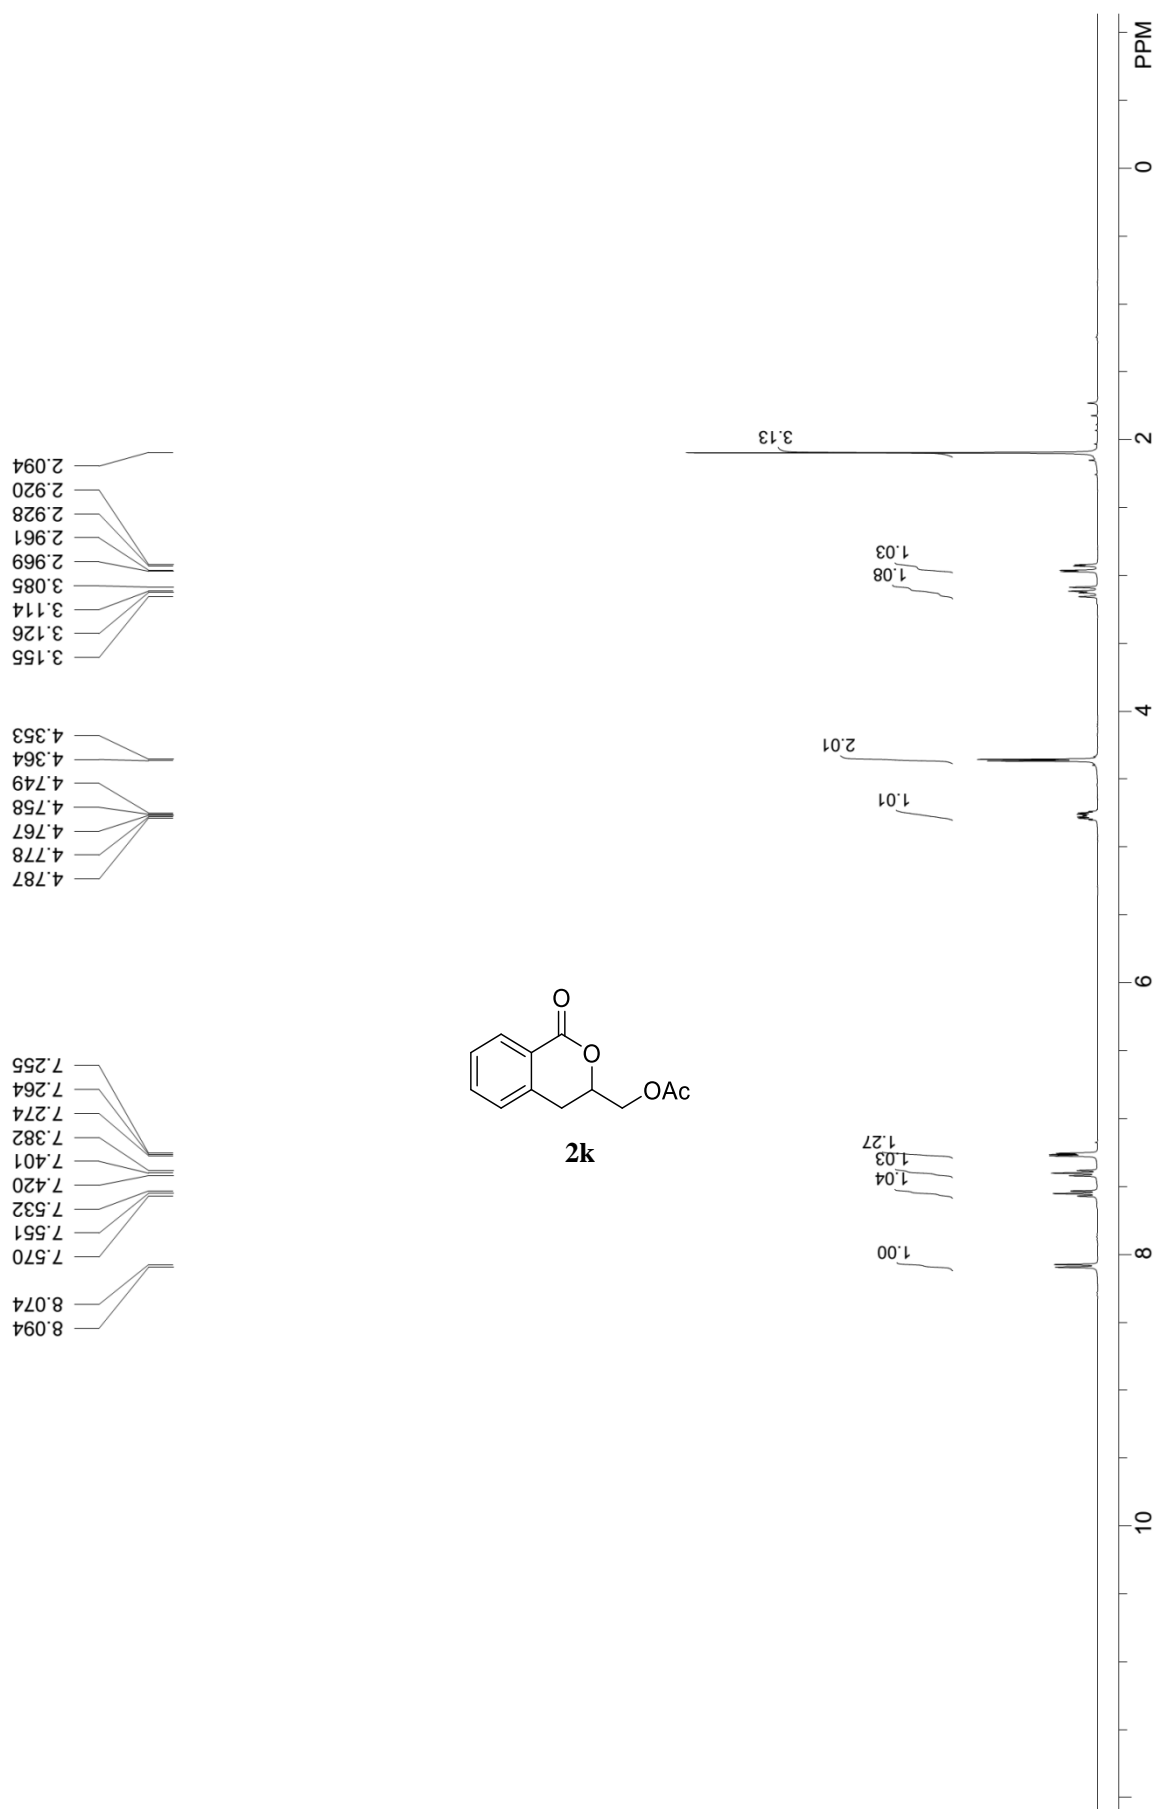

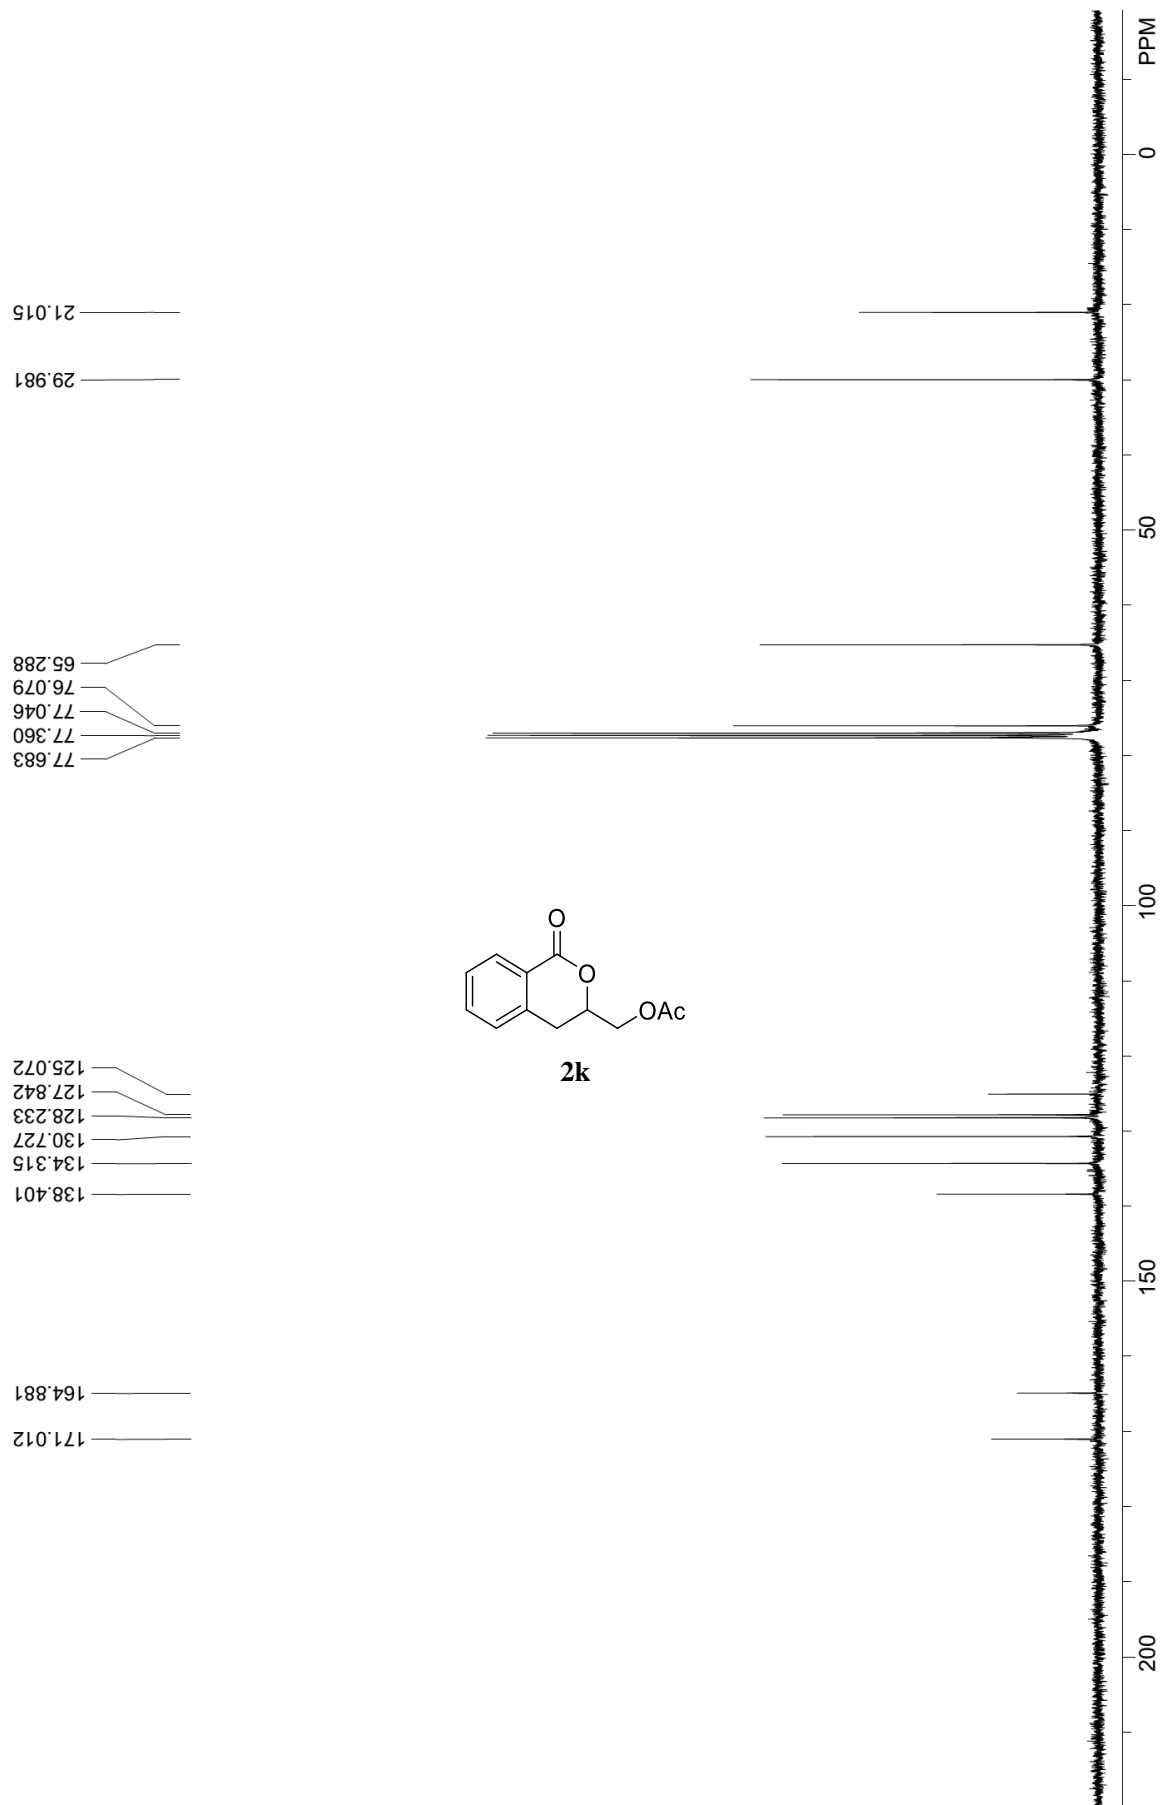

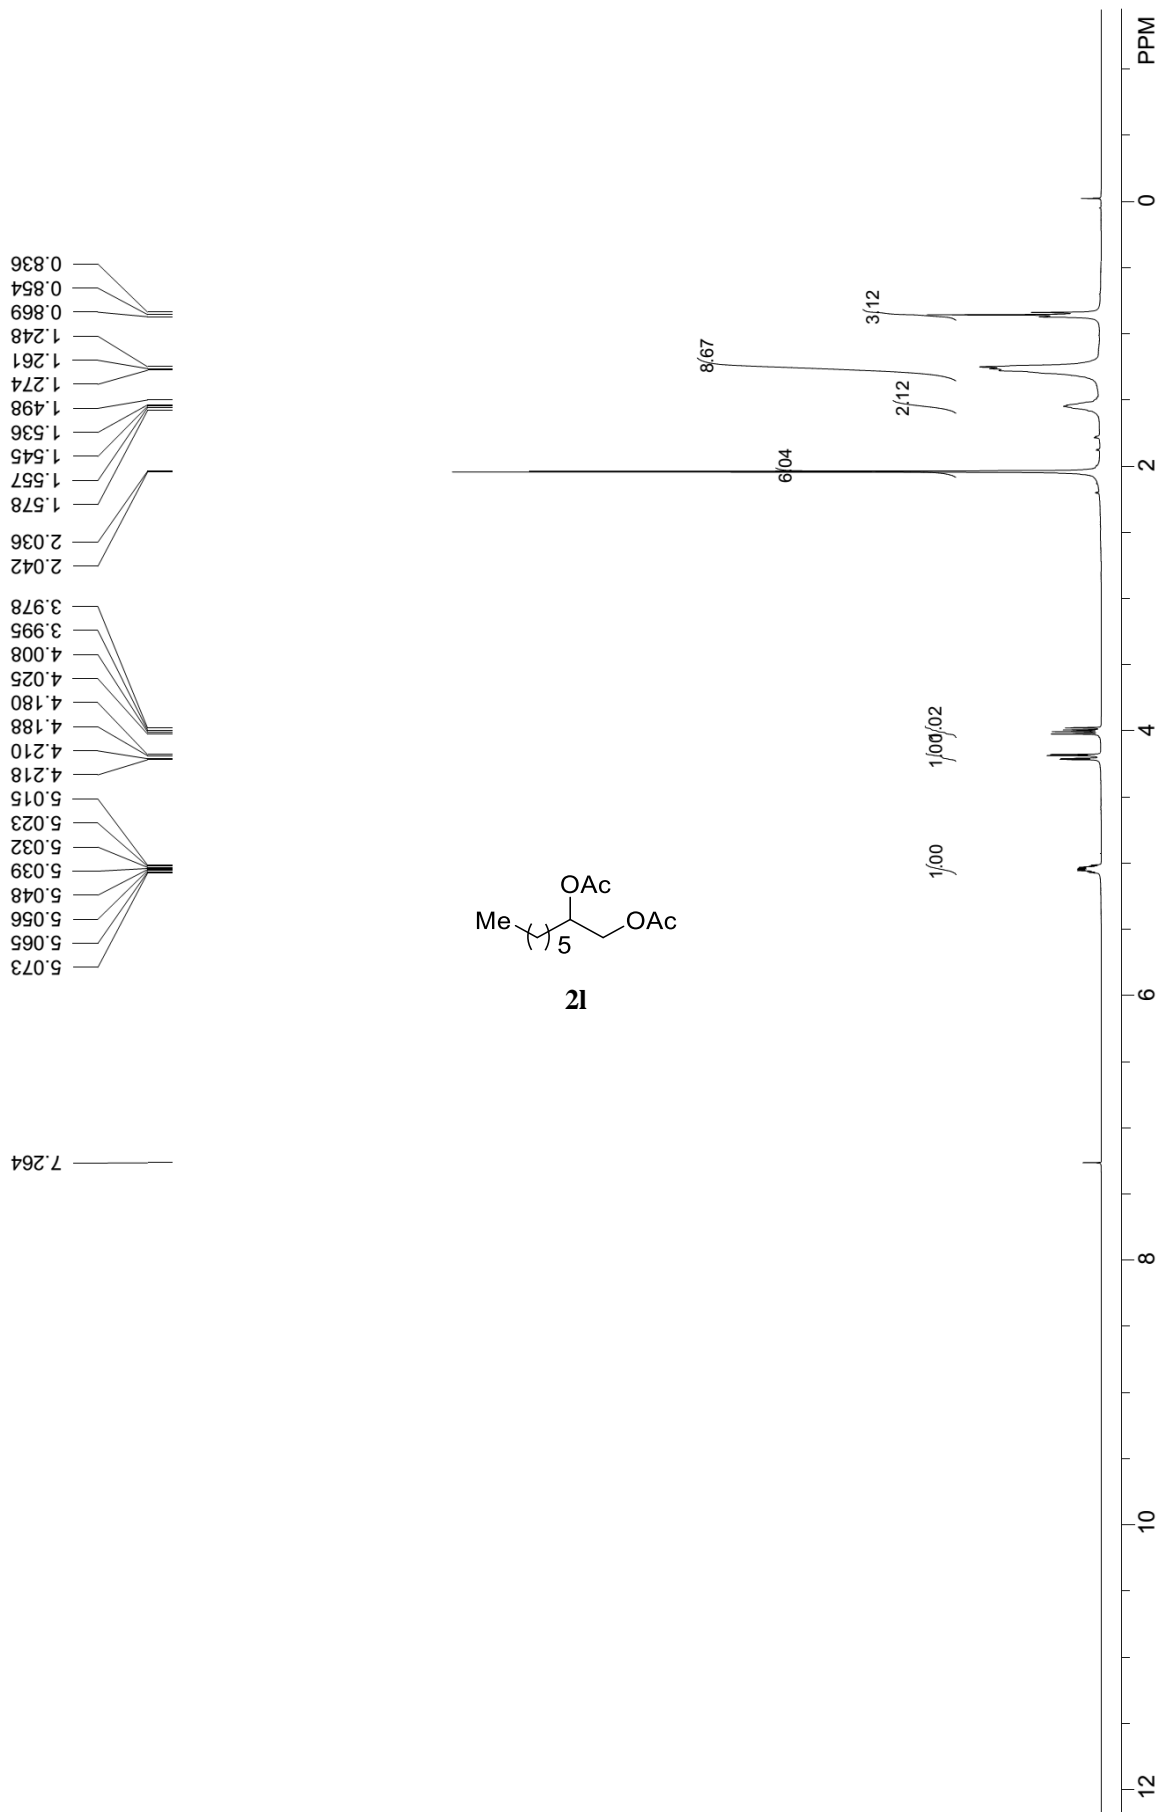

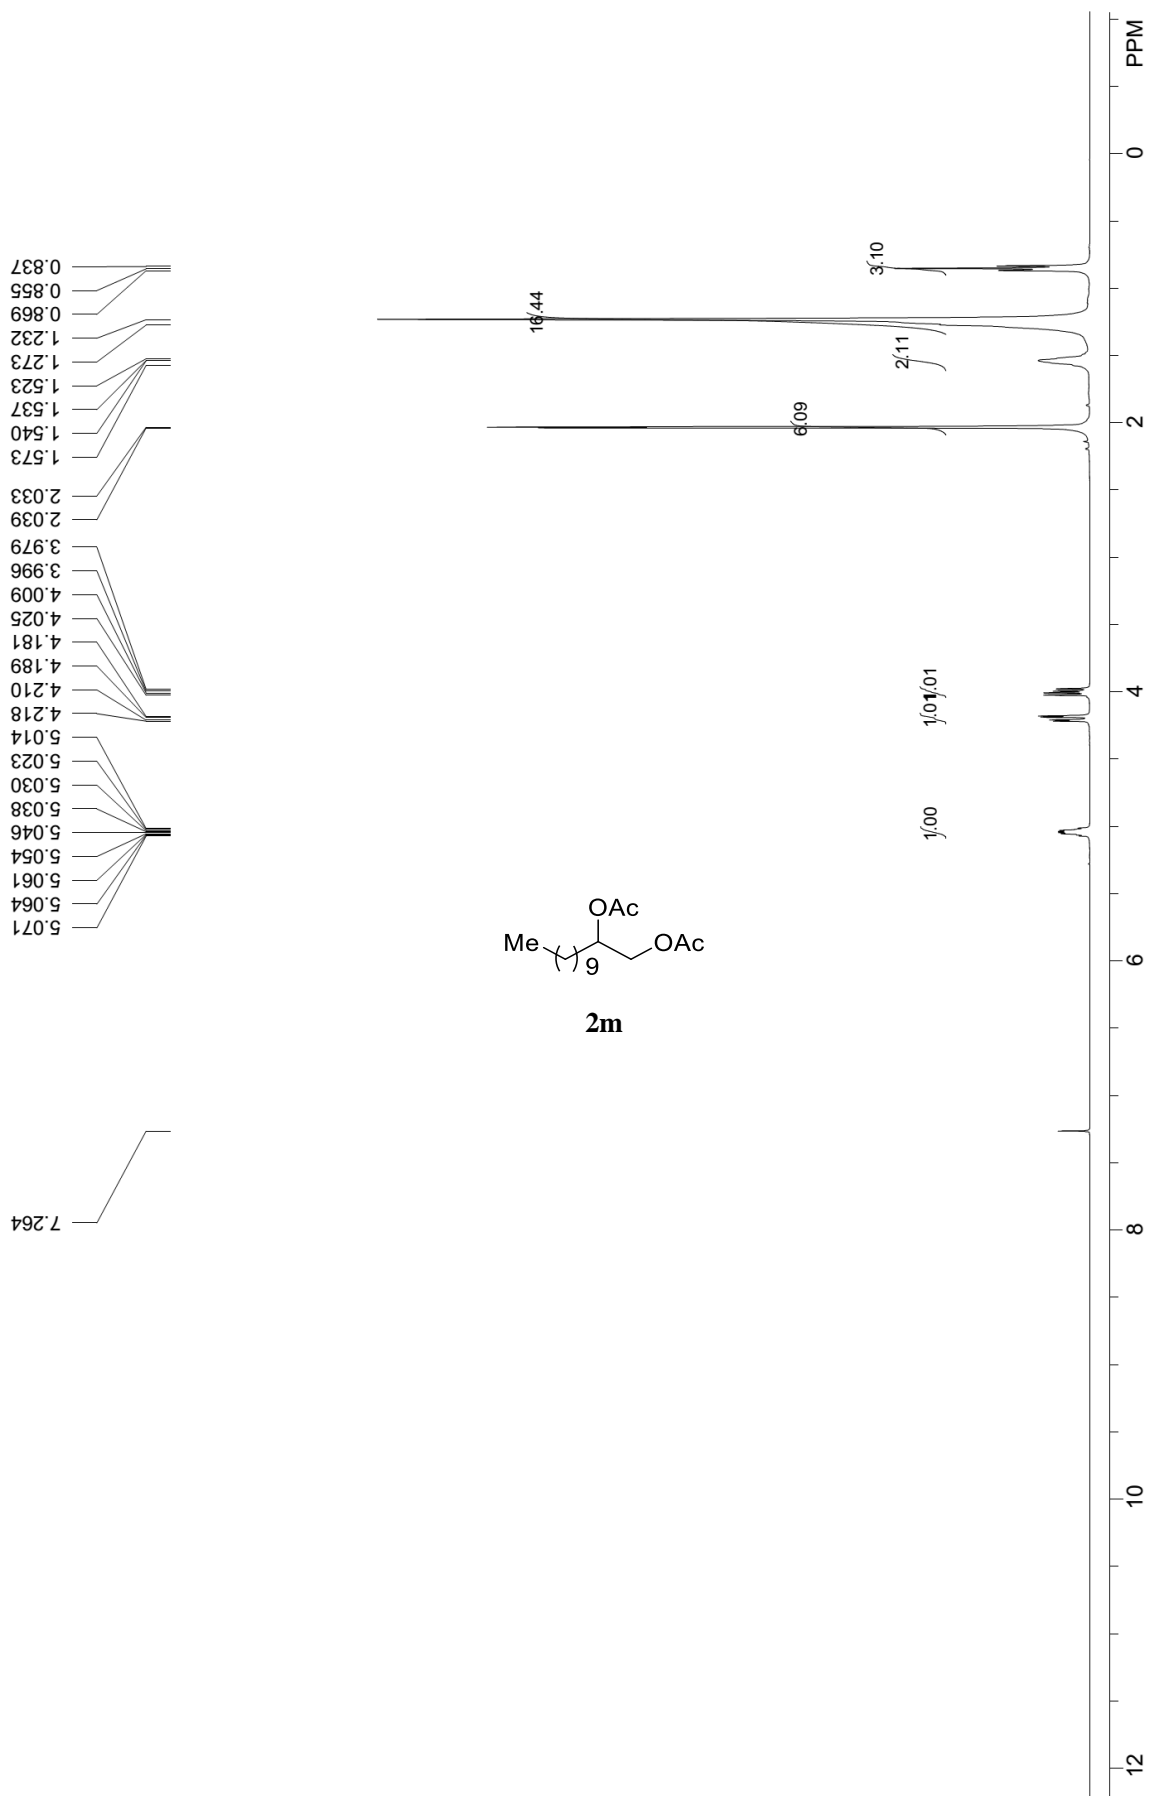

Supplement: c6cc02246d1.pdf [file c6cc02246d1.pdf]
